# Supplementary material
Source: PubMed Central journal article supplement (PMC4097818)
Supplement: NIHMS583689-supplement-Supporting_Information.pdf [file NIHMS583689-supplement-Supporting_Information.pdf]

## Experimental Supporting Information

**General information:** All reactions were performed under an argon atmosphere with stirring, unless otherwise noted. Bisoxazoline ligand 4,5-dihydro-2-(2-(4,5-dihydrooxazol-2-yl)propan-2-yl)oxazole, (achiral box) used to generate racemic samples for HPLC analysis, was synthesized using our previously reported procedure.<sup>1</sup> The 1,1-diphenylethylene **13a** was purchased from Aldrich and used without further purification. The 4,4'-(ethene-1,1-diyl)bis(methoxybenzene) **13b**, 4,4'-(ethene-1,1-diyl)bis(fluorobenzene) **13c**, 3-methylene-2,3-dihydrobenzofuran **25** and 2-ethyl-3-methylene-1-tosylindoline **27** alkene acceptors were synthesized according to a previously reported procedures.<sup>2</sup> The MnO<sub>2</sub> used was obtained from Aldrich as an activated, <5  $\mu$ m powder of 85% purity and used out of the bottle as supplied. All other reagents were purchased from Aldrich, Acros or Strem. Solvents were purified using a solvent filtration system purchased from Contour Glass Co (Irvine, California). PhCF<sub>3</sub> was purchased from Acros and distilled from CaH<sub>2</sub> prior to use. <sup>1</sup>H NMR spectra were recorded at 300, 400 or 500 MHz using Varian instruments. <sup>13</sup>C NMR data were recorded at 75 MHz. Coupling constants (*J*) are in hertz. Abbreviations used are s = singlet, d = doublet, t = triplet, m = multiplet, ABq = AB quartet, AX = AX quartet and br = broad. IR spectra were taken neat using a Nicolet-Impact 420 FTIR. Wave numbers in cm<sup>-1</sup> are reported for characteristic peaks. High resolution mass spectra were obtained at SUNY, Buffalo's mass spec. facility on a ThermoFinnigan MAT XL spectrometer. Melting points were obtained on an electrothermal melting point apparatus and are reported uncorrected. X-ray structures were obtained at the X-ray crystallographic facilities at the University of Rochester. Optical rotations were obtained using a Rudolph Autopol I Polarimeter fitted with a micro cell with a 1 dm path length. Enantiomeric excess was determined by high performance liquid chromatography (HPLC) using Chiralpak AD-RH or Regis (*S, S*)-Whelk chiral analytical column (UV detection at 254nm).

### Synthesis of substrates:

Substrates **1a**, **1b**, **3**, **5**, **7**, **9**, **17**, **20** and **22** were synthesized as previously reported.<sup>3,4,5</sup> Ethyl cyclopentane carboxylate was synthesized as previously reported.<sup>6</sup> Substrate **15** was synthesized via the

following route, adapted from a previously reported procedure<sup>7</sup>, starting from the commercially available cyclopentane carboxylic acid:

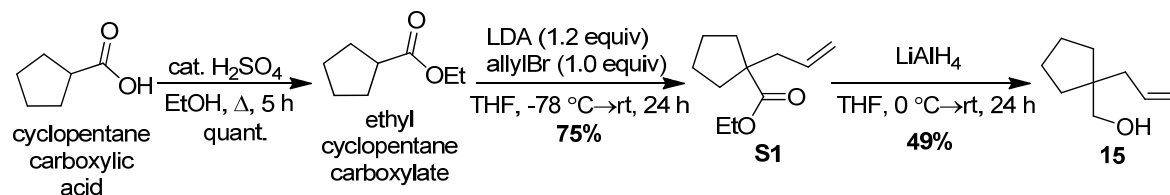

### (1-Allylcyclopentyl)methanol (**15**)

Ethyl cyclopentane carboxylate was obtained via the previously reported method<sup>6</sup>: Cyclopentane carboxylic acid (2.85 mL, 3.00 g, 26.3 mmol) was dissolved in absolute ethanol (14 mL) at room temperature. To this mixture was added conc. sulfuric acid (0.33 mL) and then the reaction was refluxed for 5 hours. The reaction mixture was allowed to cool to room temperature and then excess ethanol was removed under reduced pressure and the remaining oil was slowly poured over crushed ice with stirring. The ester separated from the mixture as an oil and was isolated with a separatory funnel. The aqueous layer was then extracted with chloroform (2 x 20 mL). The combined organic layers were washed with water, sat. sodium bicarbonate and water (1 x 50 mL each). The combined organics were dried over anhydrous magnesium sulfate. Removal of solvents gave ethyl cyclopentane carboxylate quantitatively as a pale yellow, sweetly fragrant, volatile oil.

Adapted from a previous reported procedure<sup>7</sup>: Diisopropylamine (4.46 mL, 31.6 mmol, 1.2 equiv) was dissolved in THF (26 mL) at room temperature before placing the flask in a  $-78\text{ }^\circ\text{C}$  bath. After stirring the mixture for 10 minutes 1.6 M  $n\text{BuLi}$  (19.7 mL, 31.5 mmol, 1.2 equiv) was added dropwise via syringe to the reaction mixture. After stirring the mixture for an additional 30 minutes ethyl cyclopentane carboxylate (3.74 g, 26.3 mmol, 1.0 equiv) was added dropwise via syringe. After stirring the mixture for an additional 30 minutes, allylbromide (2.29 mL, 26.3 mmol, 1.0 equiv) was added dropwise via syringe. The reaction mixture was then left to come to room temperature and stir overnight. The reaction was then quenched by the slow addition of sat. ammonium chloride solution (25 mL) and the organic layer was separated. The organics were then dried over anhydrous magnesium sulfate and the solvent removed *in vacuo* to give **S1** (3.59 g) in 75% crude yield as a clear oil.

Lithium aluminum hydride (2.10 g, 55.3 mmol, 2.8 equiv) was added in five portions to a solution of **S1** (3.59 g, 19.7 mmol, 1 equiv) in THF (105 mL) at 0 °C. The mixture was then stirred and allowed to come to room temperature overnight. The reaction was quenched with sat. ammonium chloride and the mixture was extracted with ethyl acetate (3 x 50 mL). The combined organics were dried over anhydrous magnesium sulfate and after filtration the solvents were removed *in vacuo* to give an oily residue which, when subjected to flash chromatography using hexanes-EtOAc 83 : 17, gave the pentenol **15** (1.36 g) in 49% yield as a clear oil. <sup>1</sup>H NMR (300 MHz, CDCl<sub>3</sub>) δ 5.95-5.77 (m, 1H), 5.12-5.03 (m, 2H), 3.40 (s, 2H), 2.16 (d, *J* = 6.9 Hz, 2H), 1.64-1.39 (m, 8H); <sup>13</sup>C NMR (75 MHz, CDCl<sub>3</sub>) δ 136.2, 116.9, 69.0, 47.2, 42.0, 34.1, 25.2; IR (neat): 3361, 3075, 2951, 2868, 1639, 1453, 1039, 994, 912 cm<sup>-1</sup>; LRMS (CI) calc'd for [M-OH]<sup>+</sup> C<sub>9</sub>H<sub>15</sub>: 123.2, found 123.2.

**Representative procedure for the Cu(OTf)<sub>2</sub>-catalyzed enantioselective intramolecular carboetherification:**

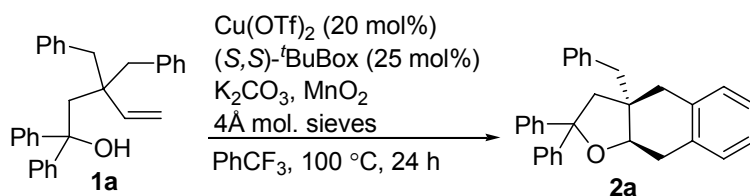

**(3a*R*,9a*R*)-3a-Benzyl-2,2-diphenyl-2,3,3a,4,9,9a-hexahydronaphtho[2,3-*b*]furan (2a)**

\*Excess moisture can adversely affect the enantioselectivity of these reactions. Care should be taken to maintain anhydrous conditions. Cu(OTf)<sub>2</sub> should either be obtained from a glove box or lightly flame dried under vacuum before use. Cu(OTf)<sub>2</sub> (9.4 mg, 0.026 mmol, 20 mol %) and (S,S)-<sup>t</sup>Bu-Box ligand (9.6 mg, 0.033 mmol, 25 mol %) were placed in a 12 mL glass reaction tube with a stir bar and PhCF<sub>3</sub> (1.0 mL). The tube was then flushed with argon, capped and stirred at 60 °C for 2 h. The reaction mixture was allowed to cool to room temperature before K<sub>2</sub>CO<sub>3</sub> (18.1 mg, 0.131 mmol, 1 equiv) and MnO<sub>2</sub> (33.9 mg, 0.390 mmol, 3 equiv) were added. Alcohol **1a** (54.4 mg, 0.130 mmol) dissolved in PhCF<sub>3</sub> (0.30 mL) was then added to the mixture followed by flame activated 4Å mol. sieves (~30 mg). The tube was flushed with argon again, capped and stirred at 100 °C for 24 h. The reaction was then

allowed to cool to room temperature before being diluted with EtOAc (3 mL) and filtered through a pad of Celite (~5 g). The Celite was then rinsed with EtOAc (3 x 30 mL) and the combined filtrate was concentrated *in vacuo*. The residue was purified by prep TLC (SiO<sub>2</sub>, 9 : 1 hexanes/Et<sub>2</sub>O) to afford 51 mg (95% yield) of **2a** as a clear oil. \*The same procedure is followed using the 4,5-dihydro-2-(2-(4,5-dihydrooxazol-2-yl)propan-2-yl)oxazole (achiral box), in order to generate racemic products used for analytical HPLC analysis. <sup>1</sup>H NMR data matched that previously reported by Chemler.<sup>3</sup> <sup>1</sup>H NMR (400 MHz, CDCl<sub>3</sub>) δ 7.65 (d, *J* = 7.6 Hz, 2H), 7.47 (t, *J* = 7.2 Hz, 2H), 7.35-7.20 (m, 7H), 7.10-7.04 (m, 3H), 7.03-6.99 (m, 3H), 6.70-6.67 (m, 2H), 4.40-4.38 (m, 1H), 3.13 (dd, *J* = 15.0, 3.2 Hz, 1H), 2.97 (dd, *J* = 13.2, 2.0 Hz, 1H), 2.73 (dd, *J* = 15.2, 3.2 Hz, 1H), 2.63 (d, *J* = 12.8 Hz, 1H), 2.48-2.44 (m, 2H), 2.38 (dd, *J* = 13.6, 1.6 Hz, 1H), 2.01 (d, *J* = 12.8 Hz, 1H); [α]<sub>D</sub><sup>19</sup> = 98.9° (*c* = 0.14, CHCl<sub>3</sub>); ee = >95%, determined by HPLC analysis [Chiralpak AD-RH, 57 : 43 MeCN/H<sub>2</sub>O, 0.20 mL/min, λ = 254 nm, t(major) = 138.65 min, t(minor) = 153.09 min].

**(3a*R*,9a*R*)-7-Chloro-3a-(4-chlorobenzyl)-2,2-diphenyl-2,3,3a,4,9,9a-hexahydronaphtho[2,3-*b*]furan (2b)**

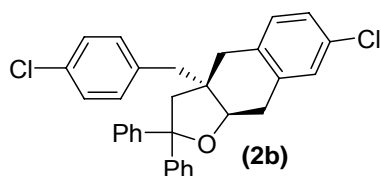

<sup>1</sup>H NMR data matched that previously reported by Chemler.<sup>3</sup>

Tetrahydronaphthofuran **2b** was purified by flash chromatography (SiO<sub>2</sub>, 100 : 0 - 80 : 20 gradient hexanes/EtOAc) to give (47 mg)

obtained from the catalytic carboetherification of **1b** as a white solid (95% yield), mp 137-139 °C. <sup>1</sup>H NMR (400 MHz, CDCl<sub>3</sub>) δ 7.60 (dd, *J* = 8.4, 1.6 Hz, 2H), 7.44 (t, *J* = 7.6 Hz, 2H), 7.33 (d, *J* = 7.2 Hz, 1H), 7.28-7.23 (m, 3H), 7.19 (dd, *J* = 8.4, 2.4 Hz, 1H), 7.07-7.04 (m, 3H), 6.99-6.96 (m, 3H), 6.75-6.72 (m, 2H), 4.34 (t, *J* = 3.6 Hz, 1H), 3.10 (dd, *J* = 15.2, 3.2 Hz, 1H), 2.90 (d, *J* = 13.2 Hz, 1H), 2.66 (dd, *J* = 15.2, 3.2 Hz, 1H), 2.46 (ABq, *J*<sub>AB</sub> = 14.0, Δ*v* = 29.5 Hz, 2H), 2.38 (ABq, *J*<sub>AB</sub> = 13.2, Δ*v* = 23.9 Hz, 2H), 1.99 (d, *J* = 13.2 Hz, 1H); [α]<sub>D</sub><sup>19</sup> = 112.1° (*c* = 0.43, CHCl<sub>3</sub>); ee = >95%, determined by HPLC analysis [Chiralpak AD-RH, 62 : 38 MeCN/H<sub>2</sub>O, 0.20 mL/min, λ = 254 nm, t(major) = 178.78 min, t(minor) = 197.52 min].

The X-ray crystal structure of **2b** (CCDC 985356) was used to establish 3a*R*, 9a*R* stereochemistry (C32 and C33 below, respectively). The structure was obtained by William W. Brennessel at the Crystallographic Facility at the University of Rochester.

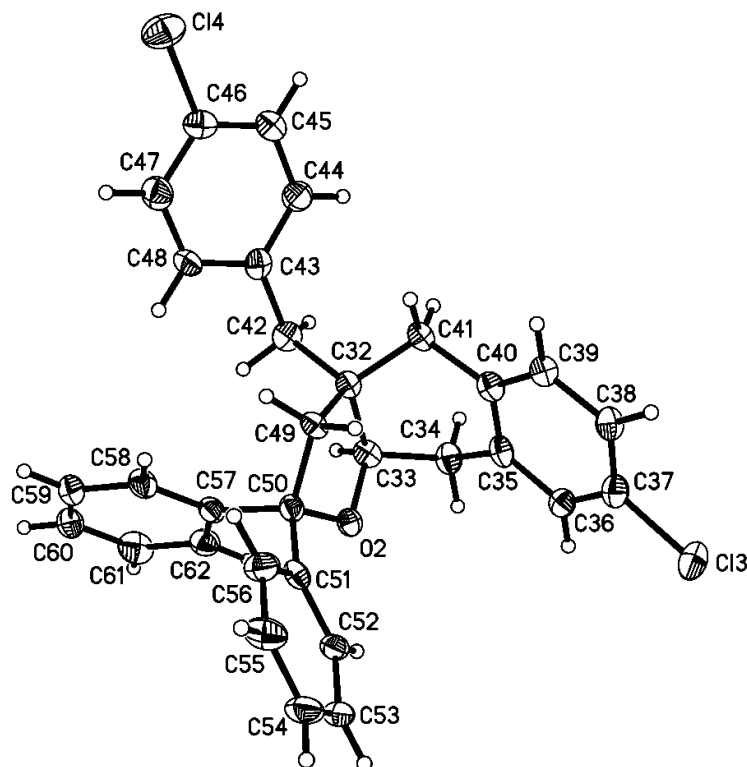

**(3a*R*,9a*R*)-3a-Benzyl-2,3,3a,4,9,9a-hexahydronaphtho[2,3-*b*]furan (**4**)**

Tetrahydronaphthofuran **4** was purified by flash chromatography (SiO<sub>2</sub>, 100 : 0 - 80 : 20 gradient hexanes/EtOAc) to give (28 mg) obtained from the catalytic carboetherification of **3** as a clear oil (71% yield). <sup>1</sup>H NMR data matched that previously reported by Chemler.<sup>3</sup> <sup>1</sup>H NMR (400 MHz, CDCl<sub>3</sub>) δ 7.35-7.07 (m, 9H), 4.12 (t, *J* = 4.4 Hz, 1H), 3.68-3.58 (m, 2H), 2.89 (dd, *J* = 15.2, 4.0 Hz, 1H), 2.80-2.69 (m, 3H), 2.57 (ABq, *J*<sub>AB</sub> = 14.8, Δ*v* = 52.8 Hz, 2H), 2.05-1.99 (m, 1H), 1.50-1.42 (m, 1H); [α]<sub>D</sub><sup>19.0</sup> = 7.3° (*c* = 0.55, CHCl<sub>3</sub>); ee = 70%, determined by HPLC analysis [Regis (*S*, *S*)-Whelk, 95 : 5 Hex./<sup>*i*</sup>PrOH, 1.00 mL/min, λ = 254 nm, *t*(major) = 4.57 min, *t*(minor) = 3.97 min].

**(1*S*,4*R*)-7-Chloro-1-(4-chlorophenyl)-1,2,4,5-tetrahydro-1,4-methanobenzo[d]oxepine (6)**

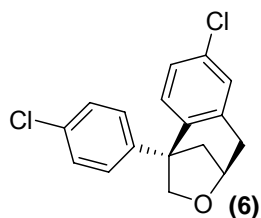

Tetrahydrofuran **6** was purified by Prep TLC (SiO<sub>2</sub>, 100 : 0 - 90 : 10 gradient hexanes/EtOAc) to give (34 mg) obtained from the catalytic carboetherification of **5** (reaction run at 120 °C) as a white solid (77% yield), mp 121-123 °C. <sup>1</sup>H NMR data matched that previously reported by Chemler.<sup>3</sup> <sup>1</sup>H NMR (400 MHz, CDCl<sub>3</sub>)

δ 7.38 (d, *J* = 8.8 Hz, 2H), 7.17-7.12 (m, 3H), 6.92 (dd, *J* = 8.4, 2.4 Hz, 1H), 6.40 (d, *J* = 8.4 Hz, 1H), 4.81-4.78 (m, 1H), 4.26 (ABq, *J*<sub>AB</sub> = 7.2, Δ*v* = 43.0 Hz, 2H), 3.09 (s, 2H), 2.47 (d, *J* = 10.8 Hz, 1H), 2.33 (dd, *J* = 11.6, 6.8 Hz, 1H); [α]<sub>D</sub><sup>19.6</sup> = -64.8° (*c* = 0.50, CHCl<sub>3</sub>). ee = 82%, determined by HPLC analysis [Regis (*S*, *S*)-Whelk, 95 : 5 Hex./<sup>i</sup>PrOH, 1.00 mL/min, λ = 254 nm, *t*(major) = 6.35 min, *t*(minor) = 5.53 min].

**(1*S*,4*R*)-4-Methyl-1-phenyl-1,2,4,5-tetrahydro-1,4-methanobenzo[d]oxepine (8)**

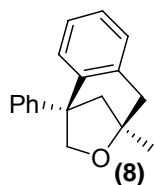

Tetrahydrofuran **8** was purified by Prep TLC (SiO<sub>2</sub>, 100 : 0 - 90 : 10 gradient hexanes/EtOAc) to give (36 mg) obtained from the catalytic carboetherification of **7** (reaction run at 120 °C) as a white solid (99% yield), mp 126-128 °C. <sup>1</sup>H NMR data

matched that previously reported by Chemler.<sup>3</sup> <sup>1</sup>H NMR (400 MHz, CDCl<sub>3</sub>) δ 7.43-7.39 (m, 2H), 7.36-7.31 (m, 1H), 7.24-7.19 (m, 2H), 7.15-7.11 (m, 2H), 6.98-6.94 (m, 1H), 6.51 (d, *J* = 8.0 Hz, 1H), 4.34 (ABq, *J*<sub>AB</sub> = 7.2, Δ*v* = 12.5 Hz, 2H), 3.10 (s, 2H), 2.38 (AXq, *J*<sub>AX</sub> = 10.8, Δ*v* = 143.6 Hz, 2H), 1.55 (s, 3H); [α]<sub>D</sub><sup>19.4</sup> = -70.5° (*c* = 0.91, CHCl<sub>3</sub>); ee = 84%, determined by HPLC analysis [Chiralpak AD-RH, 75 : 25 MeCN/H<sub>2</sub>O, 1.00 mL/min, λ = 254 nm, *t*(major) = 4.65 min, *t*(minor) = 6.53 min].

**(1*S*,4*S*,5*S*)-5-Methyl-1-phenyl-1,2,4,5-tetrahydro-1,4-methanobenzo[d]oxepine (10)**

Tetrahydrofurans **10** and **11** were purified by Prep TLC (SiO<sub>2</sub>, 95 : 5 hexanes/Et<sub>2</sub>O) to give (37 mg) obtained from the catalytic carboetherification of **9** (reaction run at 120 °C) as a clear oil [96% yield, **10** : **11** (1 : 1)]. They were separated by prep HPLC using 98 : 2 Hex./EtOAc (**10** eluted first) and **10** was a

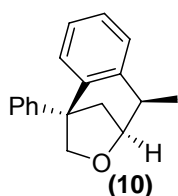

white crystalline solid, mp 179-181 °C.  $^1\text{H}$  NMR data matched that previously reported by Chemler.<sup>3</sup>  $^1\text{H}$  NMR (400 MHz,  $\text{CDCl}_3$ )  $\delta$  7.42-7.27 (m, 4H), 7.24-7.21 (m, 2H), 7.16 (td,  $J = 7.2, 1.6$  Hz, 1H), 6.95 (t,  $J = 8$  Hz, 1H), 6.47 (dd,  $J = 8.0, 1.6$  Hz, 1H), 4.51 (dd,  $J = 6.4, 2.4$  Hz, 1H), 4.30 (ABq,  $J_{\text{AB}} = 6.8$ ,  $\Delta\nu = 20.1$  Hz, 2H), 3.16-3.11 (m, 1H), 2.58 (d,  $J = 10.8$  Hz, 1H), 2.41 (dd,  $J = 11.2, 6.4$  Hz, 1H), 1.46 (d,  $J = 7.2$  Hz, 3H);  $[\alpha]_{\text{D}}^{19.7} = -36.1^\circ$  ( $c = 0.19$ ,  $\text{CHCl}_3$ ); ee = 94%, determined by HPLC analysis [Regis (*S, S*)-Whelk, 98 : 2 Hex./*i*PrOH, 0.20 mL/min,  $\lambda = 254$  nm,  $t(\text{major}) = 25.74$  min,  $t(\text{minor}) = 23.91$  min]. The relative stereochemistry of **10** was assigned by NOE and process of elimination (it was not **11**). Saturation of Ha revealed a strong enhancement of Hb but also a weak enhancement of Hd.

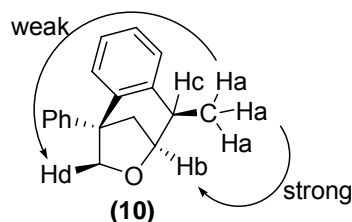

#### (1*S*,4*S*,5*R*)-5-Methyl-1-phenyl-1,2,4,5-tetrahydro-1,4-methanobenzo[d]oxepine (**11**)

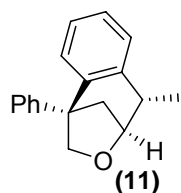

Tetrahydrofuran **11** was obtained as a clear oil.  $^1\text{H}$  NMR data matched that previously reported by Chemler.<sup>3</sup>  $^1\text{H}$  NMR (400 MHz,  $\text{CDCl}_3$ )  $\delta$  7.43-7.31 (m, 4H), 7.25-7.20 (m, 2H), 7.15 (td,  $J = 7.2, 1.2$  Hz, 1H), 6.95 (t,  $J = 8.4$  Hz, 1H), 6.48 (d,  $J = 8.0$  Hz, 1H), 4.50 (dd,  $J = 6.4, 2.8$  Hz, 1H), 4.26 (ABq,  $J_{\text{AB}} = 7.2$ ,  $\Delta\nu = 14.74$  Hz, 2H), 3.19-3.14 (m, 1H), 2.61 (d,  $J = 11.6$  Hz, 1H), 2.20 (dd,  $J = 11.2, 6.8$  Hz, 1H), 1.31 (d,  $J = 6.8$  Hz, 3H);  $[\alpha]_{\text{D}}^{20.0} = -30.7^\circ$  ( $c = 0.29$ ,  $\text{CHCl}_3$ ); ee = 94%, determined by HPLC analysis [Regis (*S, S*)-Whelk, 95 : 5 Hex./*i*PrOH, 1.00 mL/min,  $\lambda = 254$  nm,  $t(\text{major}) = 7.26$  min,  $t(\text{minor}) = 5.22$  min]. The relative stereochemistry of **11** was assigned by NOE. Saturation of Ha on diastereomer **III-11** showed strong enhancements of Hb and Hd but no enhancement of Hd.

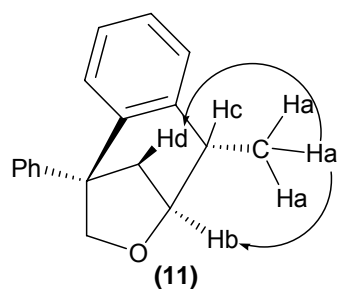

**Representative procedure for the  $\text{Cu}(\text{OTf})_2$ -catalyzed enantioselective intermolecular carboetherification:**

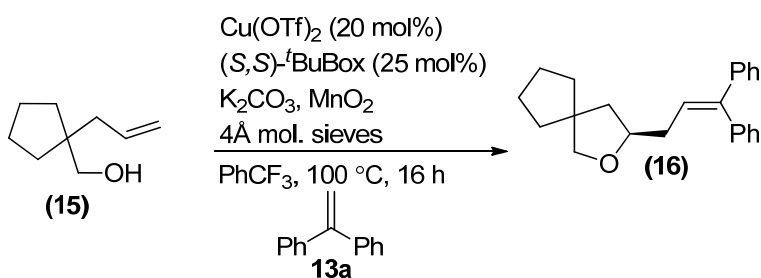

**(*R*)-3-(3,3-Diphenylallyl)-2-oxaspiro[4.4]nonane (16)**

\*Excess moisture can adversely affect the enantioselectivity of these reactions. Care should be taken to maintain anhydrous conditions.  $\text{Cu}(\text{OTf})_2$  should either be obtained from a glove box or lightly flame dried under vacuum before use.  $\text{Cu}(\text{OTf})_2$  (25.0 mg, 0.069 mmol, 20 mol %) and  $(S,S)\text{-}^t\text{Bu-Box}$  ligand (25.7 mg, 0.087 mmol, 25 mol %) were placed in a 12 mL glass reaction tube equipped with a stir bar. The mixture was dissolved in  $\text{PhCF}_3$  (1.5 mL) and the tube was flushed with argon and capped. The mixture was stirred at  $60\text{ }^\circ\text{C}$  for 2 h then allowed to cool to room temperature.  $\text{K}_2\text{CO}_3$  (47.3 mg, 0.342 mmol, 1 equiv),  $\text{MnO}_2$  (90.1 mg, 1.03 mmol, 3 equiv) and 1,1-diphenylethylene **13a** (183  $\mu\text{L}$ , 1.03 mmol, 3 equiv) were added to the reaction mixture. Alcohol **15** (48.3 mg, 0.342 mmol) was dissolved in  $\text{PhCF}_3$  (0.5 mL) and added to the tube followed by additional  $\text{PhCF}_3$  (1.4 mL). Flame-dried  $4\text{\AA}$  mol. sieves (~70 mg) were added directly to the tube while still hot. The tube was flushed with argon and capped and the reaction mixture was stirred at  $100\text{ }^\circ\text{C}$  for 16 h. The reaction was then allowed to cool to room temperature before being diluted with EtOAc (3 mL) and vacuum filtered through a pad of Celite (~5 g). The Celite was then rinsed with EtOAc (3 x 30 mL) and the combined filtrate was concentrated *in vacuo*.

The residue was purified by Prep TLC (SiO<sub>2</sub>, 92 : 8 hexanes/EtOAc) to give (41 mg) of **16** as a pale yellow oil (90% yield).  $[\alpha]_D^{19.0} = -8.5^\circ$  ( $c = 0.56$ , CHCl<sub>3</sub>); ee = 82%, determined by HPLC analysis [Chiralpak AD-RH, 60 : 40 MeCN/H<sub>2</sub>O, 0.75 mL/min,  $\lambda = 254$  nm,  $t(\text{major}) = 33.07$  min,  $t(\text{minor}) = 29.39$  min]; <sup>1</sup>H NMR (400 MHz, CDCl<sub>3</sub>)  $\delta$  7.38-7.33 (m, 2H), 7.32-7.30 (m, 1H), 7.26-7.17 (m, 7H), 6.14 (t,  $J = 7.6$  Hz, 1H), 4.09-4.02 (m, 1H), 3.58 (ABq,  $J_{AB} = 8.0$ ,  $\Delta\nu = 30.2$  Hz, 2H), 2.45 (dt,  $J = 7.2$ , 6.8 Hz, 1H), 2.33 (dt,  $J = 7.6$ , 6.0 Hz, 1H), 1.88 (dd,  $J = 12$ , 6.4 Hz, 1H), 1.66-1.43 (m, 9H); <sup>13</sup>C NMR (75 MHz, CDCl<sub>3</sub>)  $\delta$  143.2, 142.6, 140.0, 129.9, 128.2, 128.0, 127.2, 126.9, 125.6, 79.1, 78.6, 50.9, 44.8, 37.6, 36.7, 36.2, 24.7; IR (neat): 3056, 3024, 2950, 2859, 1599, 1494, 1444, 1362, 1052, 760 cm<sup>-1</sup>; HRMS (EI) calc'd for [M]<sup>+</sup> C<sub>23</sub>H<sub>26</sub>O: 318.1986, found 318.1978.

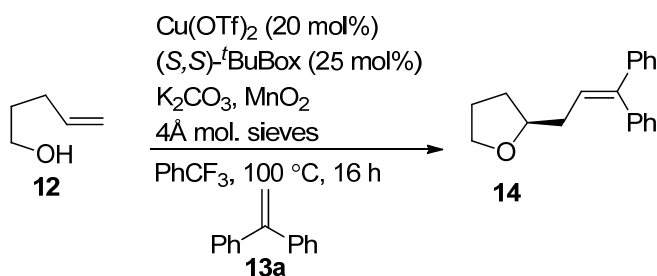

#### (S)-2-(3,3-Diphenylallyl)tetrahydrofuran (**14**)

The reaction followed the same procedure as above except this reaction was run at 0.08 M with respect to substrate, as opposed to the 0.1 M, in order to eliminate an undesired side product. Upon scale-up to 0.526 mmol of substrate this side product is unavoidable. The residue was purified by flash chromatography (SiO<sub>2</sub>, 100 : 0 - 90 : 10 gradient hexanes/Et<sub>2</sub>O) to afford 35 mg (92% yield) of **14** as a pale yellow oil.  $[\alpha]_D^{18.0} = -7.4^\circ$  ( $c = 0.39$ , CHCl<sub>3</sub>); ee = 82%, determined by HPLC analysis [Chiralpak AD-RH, 60 : 40 MeCN/H<sub>2</sub>O, 0.75 mL/min,  $\lambda = 254$  nm,  $t(\text{major}) = 13.71$  min,  $t(\text{minor}) = 12.69$  min]; <sup>1</sup>H NMR (400 MHz, CDCl<sub>3</sub>)  $\delta$  7.37 (t,  $J = 7.2$  Hz, 2H), 7.32-7.27 (m, 1H), 7.25-7.18 (m, 7H), 6.16 (t,  $J = 7.6$  Hz, 1H), 3.97-3.83 (m, 2H), 3.73 (td,  $J = 7.0$ , 6.8 Hz, 1H), 2.42 (dt,  $J = 7.2$ , 6.8 Hz, 1H), 2.35-2.28 (m, 1H), 2.01-1.93 (m, 1H), 1.89-1.82 (m, 1H), 1.54-1.45 (m, 1H); <sup>13</sup>C NMR (75 MHz, CDCl<sub>3</sub>)  $\delta$  143.2, 142.6, 140.1, 129.9, 128.2, 128.0, 127.3, 126.9, 125.7, 79.0, 67.8, 35.8, 30.9, 25.7; IR (neat): 3040, 3012,

2968, 2850, 1495, 1442, 1361, 1076, 759  $\text{cm}^{-1}$ ; HRMS (EI) calc'd for  $[\text{M}]^+$   $\text{C}_{19}\text{H}_{20}\text{O}$ : 264.1516, found 264.1509.

**(S)-5-(3,3-Diphenylallyl)-2,2-diphenyltetrahydrofuran (18a)**

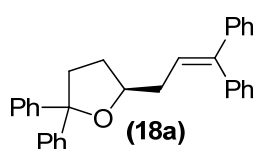

Tetrahydrofuran **18a** was purified by flash chromatography ( $\text{SiO}_2$ , 100 : 0 - 90 : 10 gradient hexanes/ $\text{Et}_2\text{O}$ ) to give (55 mg) obtained from the catalytic carboetherification of **17** and **13a** as a clear oil (90% yield).  $[\alpha]_{\text{D}}^{19.0} = 8.2^\circ$  ( $c = 0.54$ ,  $\text{CHCl}_3$ ); ee = >95%, determined by HPLC analysis [Chiralpak AD-RH, 80 : 20 to 90 : 10 gradient MeOH/ $\text{H}_2\text{O}$ , 0.10 mL/min,  $\lambda = 254$  nm,  $t(\text{major}) = 229.49$  min,  $t(\text{minor}) = 225.11$  min];  $^1\text{H}$  NMR (400 MHz,  $\text{CDCl}_3$ )  $\delta$  7.46-7.40 (m, 4H), 7.36-7.14 (m, 16H), 6.22 (t,  $J = 7.2$  Hz, 1H), 4.26-4.20 (m, 1H), 2.65-2.40 (m, 4H), 2.01-1.92 (m, 1H), 1.72-1.63 (m, 1H);  $^{13}\text{C}$  NMR (75 MHz,  $\text{CDCl}_3$ )  $\delta$  147.1, 146.7, 143.1, 142.7, 140.1, 130.0, 128.2, 128.1, 128.0, 127.9, 127.3, 126.9, 126.6, 126.5, 125.8, 88.1, 78.7, 38.8, 36.3, 30.9; IR (neat): 3056, 3024, 2965, 1598, 1493, 1446, 1362, 1228, 1053, 915, 885, 759  $\text{cm}^{-1}$ ; HRMS (EI) calc'd for  $[\text{M}]^+$   $\text{C}_{31}\text{H}_{28}\text{O}$ : 416.2139, found 416.2135.

**(R)-4,4-Bis(4-chlorophenyl)-2-(3,3-diphenylallyl)tetrahydrofuran (19)**

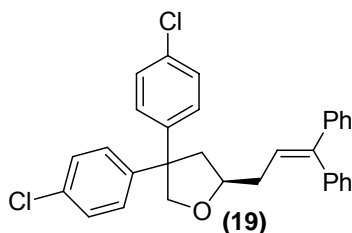

Tetrahydrofuran **19** was purified by flash chromatography ( $\text{SiO}_2$ , 100 : 0 - 80 : 20 gradient hexanes/ $\text{EtOAc}$ ) to give (53 mg) obtained from the catalytic carboetherification of **5** and **13a** as a pale orange oil (80% yield).  $[\alpha]_{\text{D}}^{19.6} = -29.9^\circ$  ( $c = 0.57$ ,  $\text{CHCl}_3$ ); ee = 80%, determined by HPLC analysis [Chiralpak AD-RH, 80 : 20 MeCN/ $\text{H}_2\text{O}$ , 1.00 mL/min,  $\lambda = 254$  nm,  $t(\text{major}) = 19.49$  min,  $t(\text{minor}) = 13.81$  min];  $^1\text{H}$  NMR (300 MHz,  $\text{CDCl}_3$ )  $\delta$  7.36-7.30 (m, 3H), 7.27-7.13 (m, 13H), 7.07 (d,  $J = 9.0$  Hz, 2H), 6.09 (t,  $J = 7.8$  Hz, 1H), 4.27 (AXq,  $J_{\text{AX}} = 9.0$ ,  $\Delta\nu = 122$  Hz, 2H), 4.19-4.08 (m, 1H), 2.58-2.35 (m, 3H), 2.26 (dd,  $J = 16.4, 12.4$  Hz, 1H);  $^{13}\text{C}$  NMR (75 MHz,  $\text{CDCl}_3$ )  $\delta$  144.3, 143.8, 142.3, 139.8, 132.5, 132.3, 129.8, 128.8, 128.7, 128.5, 128.4, 128.3, 128.2, 128.1, 127.2, 127.1, 127.0, 124.7, 78.5, 55.3,

44.2, 36.0, 29.7; IR (neat): 3058, 3021, 2958, 2922, 2854, 1598, 1494, 1445, 1261, 1095, 1013, 820  $\text{cm}^{-1}$ ;  
HRMS (EI) calc'd for  $[\text{M}]^+ \text{C}_{31}\text{H}_{26}\text{Cl}_2\text{O}$ : 484.1333, found 484.1355.

**(S)-5-(3,3-Diphenylallyl)-2,2-dimethyltetrahydrofuran (21)**

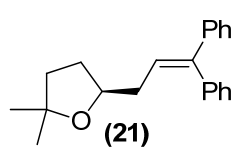

Tetrahydrofuran **21** was purified by flash chromatography ( $\text{SiO}_2$ , 95: 5 isochratic hexanes/ether) to give (62 mg) obtained from the catalytic carboetherification of **20** and **13a** as a colorless oil (84% yield).  $[\alpha]_{\text{D}}^{20} = -21.74^\circ$  ( $c = 1.0$ ,  $\text{CHCl}_3$ ); ee = 96%, determined by HPLC [Chiralpak AD-RH, 60 : 40  $\text{CH}_3\text{CN}/\text{H}_2\text{O}$ , 0.5 mL/min,  $\lambda = 254$  nm,  $t(\text{major}) = 22.96$  min,  $t(\text{minor}) = 21.41$  min];  $^1\text{H}$  NMR (400 MHz,  $\text{CDCl}_3$ ):  $\delta$  7.38-7.19 (m, 10H), 6.16 (t,  $J = 7.6$  Hz, 1H), 4.10-4.04 (m, 1H), 2.49-2.42 (m, 1H), 2.34-2.26 (m, 1H), 2.05-1.98 (m, 1H), 1.74-1.60 (m, 3H), 1.25 (s, 3H), 1.24 (s, 3H);  $^{13}\text{C}$  NMR (75 Hz,  $\text{CDCl}_3$ ):  $\delta$  143.1, 142.7, 140.1, 129.9, 128.1, 128.0, 127.2, 126.9, 125.6, 80.6, 78.2, 38.5, 36.5, 31.4, 29.2, 28.1; IR (neat): 3055, 3024, 2966, 1494, 1444, 1364, 1144, 1073, 760, 700  $\text{cm}^{-1}$ ; HRMS (EI) calcd for  $[\text{M}]^+ \text{C}_{21}\text{H}_{24}\text{O}$ : 292.1822, found: 292.1826.

**(2S,5S)-2-(But-3-en-1-yl)-5-(3,3-diphenylallyl)tetrahydrofuran (23)**

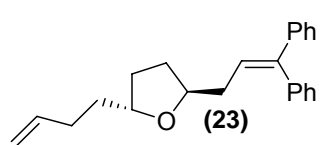

Tetrahydrofurans **23** and **24** were purified by Prep TLC ( $\text{SiO}_2$ , 100 : 0 to 95 : 5 gradient hexanes/EtOAc) to give (42 mg) obtained from the catalytic carboetherification of **22** and **13a** as a clear oil [90% yield, **23** : **24** (6 : 1)]. They were separated by prep HPLC using 98 : 2 Hex./EtOAc (**23** eluted first).  $[\alpha]_{\text{D}}^{20.1} = -9.9^\circ$  ( $c = 0.28$ ,  $\text{CHCl}_3$ ); ee = 86%, determined by HPLC analysis [Chiralpak AD-RH, 60 : 10  $\text{MeCN}/\text{H}_2\text{O}$ , 0.75 mL/min,  $\lambda = 254$  nm,  $t(\text{major}) = 25.31$  min,  $t(\text{minor}) = 21.43$  min];  $^1\text{H}$  NMR (400 MHz,  $\text{CDCl}_3$ )  $\delta$  7.38-7.28 (m, 4H), 7.25-7.17 (m, 6H), 6.13 (t,  $J = 7.6$  Hz, 1H), 5.89-5.78 (m, 1H), 5.02 (d,  $J = 17.2$  Hz, 1H), 4.95 (d,  $J = 12.4$  Hz, 1H), 4.10-4.03 (m, 1H), 3.96-3.89 (m, 1H), 2.42 (dt,  $J = 6.8, 6.4$  Hz, 1H), 2.28 (dt,  $J = 6.8, 6.4$  Hz, 1H), 2.17-1.96 (m, 4H), 1.75-1.63 (m, 1H), 1.56-1.44 (m, 3H);  $^{13}\text{C}$  NMR (75 MHz,  $\text{CDCl}_3$ )  $\delta$  143.2, 142.7, 140.1, 138.5, 129.9, 128.2, 128.0, 127.3, 126.9, 125.7, 114.4, 78.4, 78.3, 36.1, 35.1, 31.9, 31.6, 30.5; IR (neat): 3057, 3022, 2928, 2857, 1491, 1438, 1361, 1071, 907, 755  $\text{cm}^{-1}$ ; HRMS (EI) calc'd for

$[M]^+ C_{23}H_{26}O$ : 318.1978, found 318.1978. The relative stereochemistry of **23** was assigned by process of elimination (it was not **24**).

**(2*R*,5*S*)-2-(But-3-en-1-yl)-5-(3,3-diphenylallyl)tetrahydrofuran (24)**

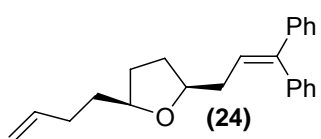

Tetrahydrofuran **24** was obtained as a clear oil.  $[\alpha]_D^{19.2} = -2.6^\circ$  ( $c = 0.16$ ,  $CHCl_3$ ).  $ee = 97\%$ , determined by HPLC analysis [Chiralpak AD-RH, 60 : 40 MeCN/H<sub>2</sub>O, 0.75 mL/min,  $\lambda = 254$  nm,  $t(\text{major}) = 21.61$  min,  $t(\text{minor}) =$

23.11 min];  $^1H$  NMR (400 MHz,  $CDCl_3$ )  $\delta$  7.38-7.34 (m, 2H), 7.36-7.29 (m, 2H), 7.25-7.18 (m, 6H), 6.14 (t,  $J = 7.2$  Hz, 1H), 5.88-5.79 (m, 1H), 5.02 (d,  $J = 17.2$  Hz, 1H), 4.95 (d,  $J = 8.0$  Hz, 1H), 3.96-3.90 (m, 1H), 3.86-3.81 (m, 1H), 2.43 (dt,  $J = 6.8, 6.4$  Hz, 1H), 2.31 (dt,  $J = 7.2, 6.4$  Hz, 1H), 2.17-1.90 (m, 4H), 1.72-1.65 (m, 1H), 1.56-1.44 (m, 4H);  $^{13}C$  NMR (75 MHz,  $CDCl_3$ )  $\delta$  143.2, 142.7, 140.1, 138.6, 130.0, 128.2, 128.0, 127.3, 126.9, 125.7, 114.4, 110.0, 78.9, 78.8, 36.2, 35.3, 31.0, 30.5, 29.8; IR (neat): 3062, 3025, 2916, 2856, 1495, 1446, 1367, 1078, 998, 907, 755  $cm^{-1}$ ; HRMS (EI) calc'd for  $[M]^+ C_{23}H_{26}O$ : 318.1978, found 318.1973. The relative stereochemistry of **24** was assigned by NOE. In the first experiment, saturation of  $H_A$  showed strong enhancements of  $H_C$  and  $H_D$ . In a second experiment, saturation of  $H_C$  revealed a strong enhancement of  $H_A$ , a weak enhancement of  $H_E$ , but no enhancement of  $H_D$ . This data has led to our support of this structure for **24**.

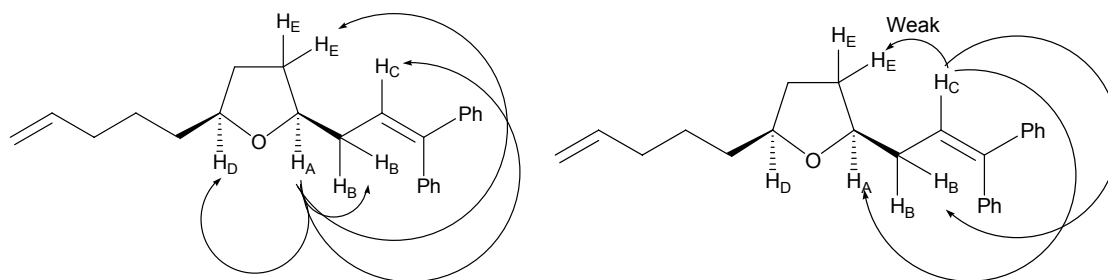

**(S)-5-(3,3-Bis(4-methoxyphenyl)allyl)-2,2-diphenyltetrahydrofuran (18b)**

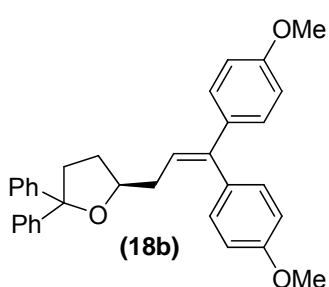

Tetrahydrofuran **18b** was purified by flash chromatography (SiO<sub>2</sub>, 100 : 0 - 80 : 20 gradient hexanes/EtOAc) to give (60 mg) obtained from the catalytic carboetherification of **17** and **13b** as a pale yellow oil (88% yield).  $[\alpha]_D^{19.9} = 4.6^\circ$  ( $c = 0.85$ , CHCl<sub>3</sub>); ee = >95%, determined by HPLC analysis [Chiralpak AD-RH, 65 : 35 MeCN/H<sub>2</sub>O, 0.20 mL/min,  $\lambda = 254$  nm,  $t(\text{major}) = 77.01$  min,

$t(\text{minor}) = 73.07$  min]; <sup>1</sup>H NMR (400 MHz, CDCl<sub>3</sub>)  $\delta$  7.44 (td,  $J = 9.6, 1.2$  Hz, 4H), 7.31-7.16 (m, 6H), 7.13-7.08 (m, 4H), 6.88 (d,  $J = 9.6$  Hz, 2H), 6.79 (d,  $J = 10$  Hz, 2H), 6.07 (t,  $J = 6.8$  Hz, 1H), 4.26-4.18 (m, 1H), 3.83 (s, 3H), 3.79 (s, 3H), 2.67-2.38 (m, 4H), 2.02-1.93 (m, 1H), 1.72-1.63 (m, 1H); <sup>13</sup>C NMR (75 MHz, CDCl<sub>3</sub>)  $\delta$  158.7, 158.5, 147.1, 146.7, 142.2, 135.8, 132.6, 131.1, 128.4, 128.1, 127.9, 126.5, 125.9, 123.84, 113.5, 113.4, 88.1, 78.9, 55.2, 38.8, 36.3, 30.9; IR (neat): 3058, 3022, 2925, 2850, 1606, 1511, 1448, 1288, 1246, 1174, 1109, 1034, 833 cm<sup>-1</sup>; HRMS (EI) calc'd for [M]<sup>+</sup> C<sub>33</sub>H<sub>32</sub>O<sub>3</sub>: 476.2343, found 476.2346.

**(S)-5-(3,3-Bis(4-fluorophenyl)allyl)-2,2-diphenyltetrahydrofuran (18c)**

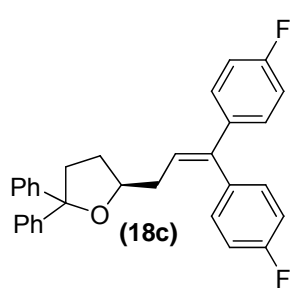

Tetrahydrofuran **18c** was purified by flash chromatography (SiO<sub>2</sub>, 100 : 0 - 90 : 10 gradient hexanes/Et<sub>2</sub>O) to give (44 mg) obtained from the catalytic carboetherification of **17** and **13c** as a pale yellow oil (70% yield).  $[\alpha]_D^{19.5} = -4.5^\circ$  ( $c = 0.98$ , CHCl<sub>3</sub>); ee = >95%, determined by HPLC analysis [Chiralpak AD-RH, 65 : 35 MeCN/H<sub>2</sub>O, 0.20 mL/min,  $\lambda = 254$  nm,  $t(\text{major}) = 78.12$  min,

$t(\text{minor}) = 74.75$  min]; <sup>1</sup>H NMR (300 MHz, CDCl<sub>3</sub>)  $\delta$  7.48-7.42 (m, 4H), 7.34-6.92 (m, 14H), 6.16 (t,  $J = 7.2$  Hz, 1H), 4.30-4.22 (m, 1H), 2.69-2.38 (m, 4H), 2.05-1.95 (m, 1H), 1.73-1.65 (m, 1H); <sup>13</sup>C NMR (75 MHz, CDCl<sub>3</sub>)  $\delta$  162.1 (d,  $J_1 = 245$  Hz), 161.9 (d,  $J_1 = 245$  Hz), 147.0, 146.6, 141.2, 131.5 (d,  $J_3 = 8.03$  Hz), 128.8 (d,  $J_3 = 6.9$  Hz), 128.1, 128.0, 126.6, 126.1, 125.9, 125.8, 115.2 (d,  $J_2 = 21.75$  Hz), 114.9 (d,  $J_2 = 21.75$  Hz), 88.2, 78.6, 38.7, 36.3, 30.9; IR (neat): 3058, 2964, 2877, 1602, 1506, 1448, 1261, 1224,

1557, 1094, 1054, 912, 838, 797  $\text{cm}^{-1}$ ; HRMS (CI) calc'd for  $[\text{M}+\text{H}]^+$   $\text{C}_{31}\text{H}_{27}\text{OF}_2$ : 453.2026, found 453.2024.

**(R)-3-(2-(5,5-Diphenyltetrahydrofuran-2-yl)ethyl)benzofuran (26)**

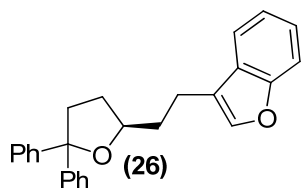

Tetrahydrofuran **26** was purified by flash chromatography ( $\text{SiO}_2$ , 100 : 0 - 90 : 10 gradient hexanes/EtOAc) to give (50 mg) obtained from the catalytic carboetherification of **17** and **25** as a clear oil (88% yield).  $[\alpha]_{\text{D}}^{18.3} = 15.7^\circ$  ( $c = 0.71$ ,  $\text{CHCl}_3$ ); ee = 94%, determined by HPLC analysis [Chiralpak AD-RH, 90 : 10 MeCN/ $\text{H}_2\text{O}$ , 0.65 mL/min,  $\lambda = 254$  nm,  $t(\text{major}) = 17.87$  min,  $t(\text{minor}) = 16.75$  min];  $^1\text{H}$  NMR (400 MHz,  $\text{CDCl}_3$ )  $\delta$  7.57 (d,  $J = 7.6$  Hz, 1H), 7.48-7.44 (m, 6H), 7.33-7.26 (m, 6H), 7.25-7.17 (m, 2H), 4.24-4.18 (m, 1H), 2.98-2.79 (m, 2H), 2.71-2.64 (m, 1H), 2.60-2.53 (m, 1H), 2.15-2.03 (m, 2H), 1.97-1.93 (m, 1H), 1.75-1.66 (m, 1H);  $^{13}\text{C}$  NMR (75 MHz,  $\text{CDCl}_3$ )  $\delta$  155.4, 147.3, 146.7, 141.1, 128.3, 128.1, 128.0, 126.6, 126.5, 125.9, 125.8, 124.1, 122.2, 120.2, 119.7, 111.4, 88.0, 78.3, 38.8, 35.8, 31.4, 20.4; IR (neat): 3059, 3012, 2928, 2859, 1597, 1490, 1454, 1261, 1184, 1092, 1051, 858, 801, 747  $\text{cm}^{-1}$ ; HRMS (EI) calc'd for  $[\text{M}]^+$   $\text{C}_{26}\text{H}_{24}\text{O}_2$ : 368.1774, found 368.1771.

**(R)-3-(2-(5,5-Diphenyltetrahydrofuran-2-yl)ethyl)-2-ethyl-1-tosyl-1H-indole (28)**

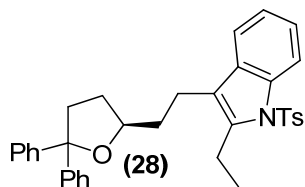

Tetrahydrofuran **28** was purified by flash chromatography ( $\text{SiO}_2$ , 100 : 0 - 90 : 10 gradient hexanes/EtOAc) to give (66 mg) obtained from the catalytic carboetherification of **17** and **27** as a white solid (81% yield), required two columns to obtain pure compound **28**;  $[\alpha]_{\text{D}}^{20} = 3.75^\circ$  ( $c = 0.95$ ,  $\text{CHCl}_3$ ); ee = nd (enantiomers were unseparable); mp 47  $^\circ\text{C}$ ;  $^1\text{H}$  NMR (400 MHz,  $\text{CDCl}_3$ ):  $\delta$  8.18 (d,  $J = 8.4$  Hz, 1H), 7.52 (d,  $J = 8.8$  Hz, 2H), 7.49-7.41 (m, 4H), 7.32-7.19 (m, 8H), 7.06 (d,  $J = 8.4$  Hz, 2H), 4.06-4.00 (m, 1H), 3.10-3.01 (m, 2H), 2.91-2.75 (m, 2H), 2.66-2.59 (m, 1H), 2.55-2.49 (m, 1H), 2.28 (s, 3H), 2.00-1.84 (m, 2H), 1.77-1.70 (m, 1H), 1.64-1.55 (m, 1H), 1.31 (t,  $J = 7.2$  Hz, 3H);  $^{13}\text{C}$  NMR (75 Hz,  $\text{CDCl}_3$ ):  $\delta$  147.3, 146.7, 144.2, 139.3, 136.9, 135.9, 130.9, 129.5, 128.1, 128.0, 126.6, 126.5, 126.1, 125.8, 125.7, 123.9, 123.3, 120.7, 118.6,

115.4, 88.0, 77.9, 38.7, 36.6, 31.3, 21.5, 20.9, 19.9, 15.7; IR (neat): 3058, 2934, 2873, 1597, 1448, 1361, 1225, 1172, 1090, 1048, 811, 748, 703  $\text{cm}^{-1}$ ; HRMS (EI) calcd for  $[\text{M}]^+ \text{C}_{35}\text{H}_{35}\text{O}_3\text{NS}$ : 549.2332, found: 549.2335.

**(S,E)-5-(3-(4-methoxyphenyl)allyl)-2,2-diphenyltetrahydrofuran (30)**

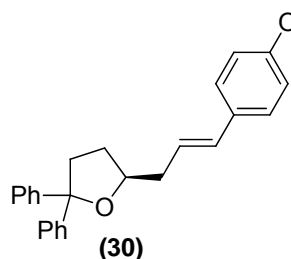

Tetrahydrofuran **30** was purified by preparative TLC ( $\text{SiO}_2$ , 95 : 5 hexanes/ether, developed 2x) to give (25 mg) obtained from the catalytic carboetherification of **17** and **29a** as a colorless oil (46% yield).  $[\alpha]_{\text{D}}^{19} = 8.30^\circ$  ( $c = 0.6$ ,  $\text{CHCl}_3$ ); ee = >95%, determined by HPLC [Chiralpak AD-RH, 65 : 35  $\text{CH}_3\text{CN}/\text{H}_2\text{O}$ , 0.5 mL/min,  $\lambda = 254$  nm,  $t(\text{major}) = 31.22$  min,  $t(\text{minor}) = 39.63$  min];  $^1\text{H}$  NMR (400 MHz,  $\text{CDCl}_3$ ):  $\delta$  7.46 (d,  $J = 8.0$  Hz, 4H), 7.32-7.25 (m, 6H), 7.22-7.17 (m, 2H), 6.85 (m, 2H), 6.41 (d,  $J = 16.0$  Hz, 1H), 6.13 (dt,  $J = 16.0$  Hz, 7.2 Hz, 1H), 4.31-4.23 (m, 1H), 3.81 (s, 3H), 2.67-2.61 (m, 2H), 2.57-2.45 (m, 2H), 2.09-1.98 (m, 1H), 1.81-1.70 (m, 1H);  $^{13}\text{C}$  NMR (75 Hz,  $\text{CDCl}_3$ ):  $\delta$  158.8, 147.1, 146.6, 131.4, 130.5, 128.1, 128.0, 127.5, 127.1, 126.6, 126.5, 125.9, 124.6, 113.9, 88.2, 78.7, 55.3, 39.7, 38.8, 30.7; IR (neat): 3028, 2952, 2835, 1607, 1510, 1456, 1248, 1174, 1035, 701  $\text{cm}^{-1}$ ; HRMS (EI) calcd for  $[\text{M}]^+ \text{C}_{26}\text{H}_{26}\text{O}_2$ : 370.1947, found: 370.1933.

**(S,E)-5-(3-(4-(tert-butyl)phenyl)allyl)-2,2-dimethyltetrahydrofuran (31)**

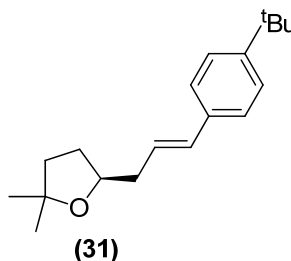

Tetrahydrofuran **31** was purified by preparative TLC ( $\text{SiO}_2$ , 95 : 5 hexanes/ether, developed 2x) to give (35 mg) obtained from the catalytic carboetherification of **20** and **29b** as a colorless oil (42% yield).  $[\alpha]_{\text{D}}^{19} = -21.73^\circ$  ( $c = 0.55$ ,  $\text{CHCl}_3$ ); ee = 95%, determined by HPLC [Chiralpak AD-RH, 90 : 10  $\text{CH}_3\text{CN}/\text{H}_2\text{O}$ , 0.5 mL/min,  $\lambda = 254$  nm,  $t(\text{major}) = 35.61$  min,  $t(\text{minor}) = 12.19$  min];  $^1\text{H}$  NMR (400 MHz,  $\text{CDCl}_3$ ):  $\delta$  7.33-7.28 (m, 4H), 6.42 (d,  $J = 16.0$  Hz, 1H), 6.18 (dt,  $J = 16.0$  Hz, 7.6 Hz, 1H), 4.11-4.03 (m, 1H), 2.55-2.48 (m, 1H), 2.40-2.33 (m, 1H), 2.05-1.97 (m, 1H), 1.75-1.66 (m, 3H), 1.31 (s, 9H), 1.27 (s, 3H), 1.24 (s, 3H);  $^{13}\text{C}$  NMR (75 Hz,  $\text{CDCl}_3$ ):  $\delta$  150.0, 134.9, 131.7, 125.9, 125.7, 125.4, 80.7,

78.1, 39.8, 38.4, 34.5, 31.3, 31.1, 29.2, 28.1; IR (neat): 2964, 2868, 1507, 1457, 1363, 1269, 1143, 1050, 967  $\text{cm}^{-1}$ ; HRMS (EI) calcd for  $[\text{M}]^+ \text{C}_{19}\text{H}_{28}\text{O}$ : 272.2146, found: 272.2140.

Conversion of **14** to the known compound (*S*)-2-(Tetrahydrofuran-2-yl)ethyl benzoate to establish absolute configuration.<sup>8</sup>

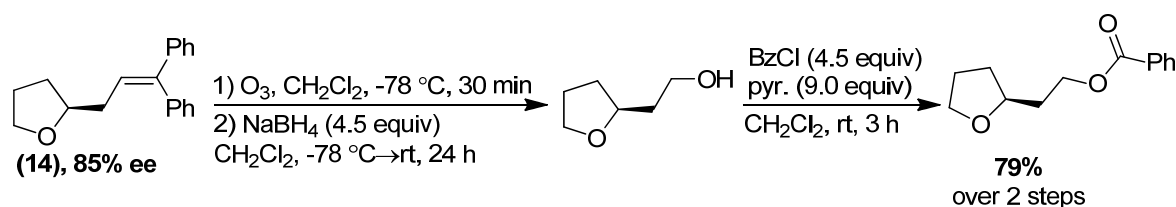

#### (*S*)-2-(Tetrahydrofuran-2-yl)ethyl benzoate:

Tetrahydrofuran **14** (35 mg, 0.132 mmol, 1 equiv) was dissolved in  $\text{CH}_2\text{Cl}_2$  (2.0 mL) and the mixture placed, with stirring, in a  $-78^\circ\text{C}$  bath. After allowing the mixture to stir for 10 minutes a stream of  $\text{O}_3$  gas was bubbled through until a deep blue color persisted even with removal of the gas stream. Once enough  $\text{O}_3$  had been bubbled into the mixture the reaction was purged with a stream of argon gas. The mixture was then treated with sodium borohydride (23.0 mg, 0.608 mmol, 4.5 equiv) and allowed to stir and come to room temperature overnight. The reaction was then quenched with 1 M HCl (5 mL) and extracted with diethyl ether (3 x 10 mL). The combined organics were then dried over anhydrous sodium sulfate and the solvent removed *in vacuo* to give 131 mg of the crude alcohol product which was used in the next step without further purification.

Pyridine (0.097 mL, 1.20 mmol, 9 equiv) was added via syringe at room temperature to a solution of the crude alcohol from the previous step (131 mg) dissolved in  $\text{CH}_2\text{Cl}_2$  (2.0 mL). The resulting mixture was allowed to stir for 20 minutes before benzoyl chloride (0.069 mL, 0.594 mmol, 4.5 equiv) was added drop wise via syringe. The mixture was then allowed to stir at room temperature for 3 hour before being quenched with water (5 mL) and then extracted with  $\text{CH}_2\text{Cl}_2$  (3 x 5 mL). The combined organic layers were then washed with brine (15 mL) and dried over anhydrous sodium sulfate. Removal of the solvent *in vacuo* gave the crude residue which was purified by flash chromatography 30%  $\text{Et}_2\text{O}$  in hexanes to give (*S*)-2-(tetrahydrofuran-2-yl)ethyl benzoate<sup>8</sup>, 23.0 mg, as a colorless oil (79% yield over 2 steps).

$[\alpha]_D^{19.5} = 13.1^\circ$  ( $c = 0.53$ ,  $\text{CH}_2\text{Cl}_2$ ).  $^1\text{H}$  NMR data matched that previously reported by Matsubara.<sup>8</sup>  $^1\text{H}$  NMR (400 MHz,  $\text{CDCl}_3$ )  $\delta$  8.04 (d,  $J = 8.0$  Hz, 2H), 7.56 (t,  $J = 7.6$  Hz, 1H), 7.44 (t,  $J = 8.0$  Hz, 2H), 4.50-4.37 (m, 2H), 4.05-3.97 (m, 1H), 3.92-3.86 (m, 1H), 3.78-3.72 (m, 1H), 2.12-1.85 (m, 5H), 1.60-1.51 (m, 1H).

The absolute configuration of the 2-(tetrahydrofuran-2-yl)ethyl benzoate we obtained was assigned as (*S*) by comparing the optical rotation with the literature value of the known enantiomer.<sup>8</sup> [lit. (*R*)-2-(tetrahydrofuran-2-yl)ethyl benzoate:  $[\alpha]_D^{26} = -14.7^\circ$  ( $c = 2.21$ ,  $\text{CH}_2\text{Cl}_2$ )].

## References

1. Miao, L.; Haque, I.; Manzoni, M. R.; Tham, W. S.; Chemler, S. R., *Org. Lett.* **2010**, *12* (21), 4739-4741.
2. (a) Liwosz, T. W.; Chemler, S. R., *Chem. Eur. J.* **2013**, *19* (38), 12771-12777.  
(b) Terada, Y.; Arisawa, M.; Nishida, A., *Angew. Chem. Int. Ed.* **2004**, *43* (31), 4063-4067.
3. Miller, Y.; Miao, L.; Hosseini, A. S.; Chemler, S. R., *J. Am. Chem. Soc.* **2012**, *134* (29), 12149-12156.
4. Lemieïère, G.; Gandon, V.; Cariou, K.; Hours, A.; Fukuyama, T.; Dhimane, A.-L.; Fensterbank, L.; Malacria, M., *J. Am. Chem. Soc.* **2009**, *131* (8), 2993-3006.
5. Dragoli, D. R.; Burdett, M. T.; Ellman, J. A., *J. Am. Chem. Soc.* **2001**, *123* (41), 10127-10131.
6. Youssef, A. M.; Safo, M. K.; Danso-Danquah, R.; Joshi, G. S.; Kister, J.; Marden, M. C.; Abraham, D. J., *J. Med. Chem* **2002**, *45* (6), 1184-1195.
7. Aburel, P. S.; Romming, C.; Ma, K.; Undheim, K., *J. Chem. Soc., Perkin Trans. 1* **2001**, (12), 1458-1472.
8. Asano, K.; Matsubara, S., *J. Am. Chem. Soc.* **2011**, *133* (42), 16711-16713.

## HPLC traces:

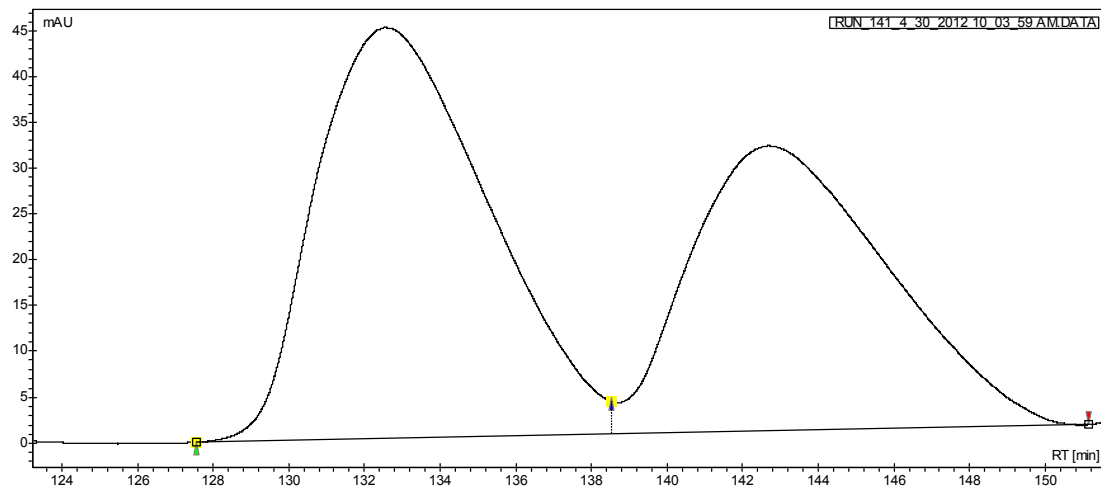

| # | Time [min] | Area [%] |
|---|------------|----------|
| 1 | 132.55     | 55.6     |
| 2 | 142.67     | 44.4     |

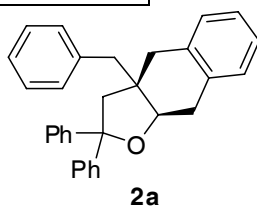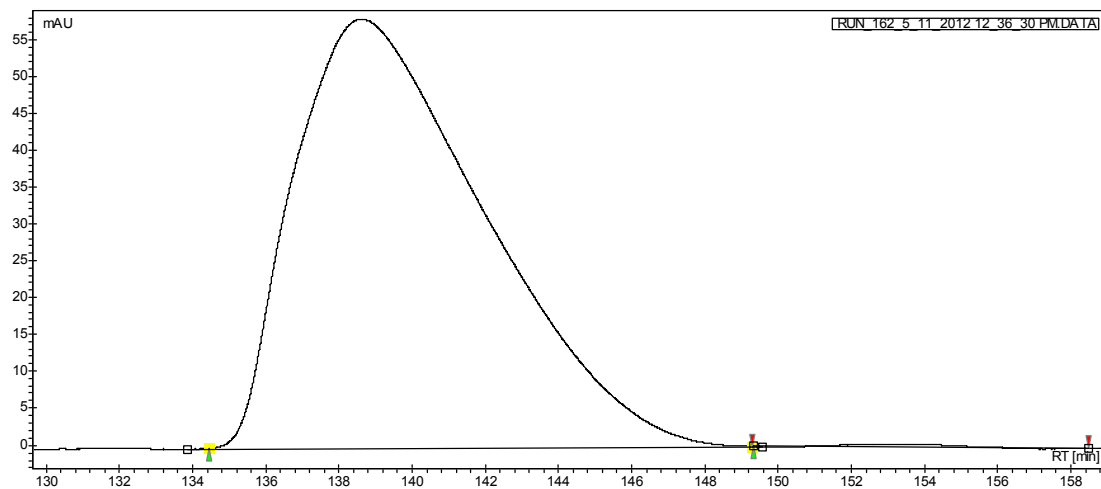

| # | Time [min] | Area [%] |
|---|------------|----------|
| 1 | 138.65     | 99.7     |
| 2 | 153.09     | 0.3      |

**2a** using (S,S)-*i*-Pr-box:

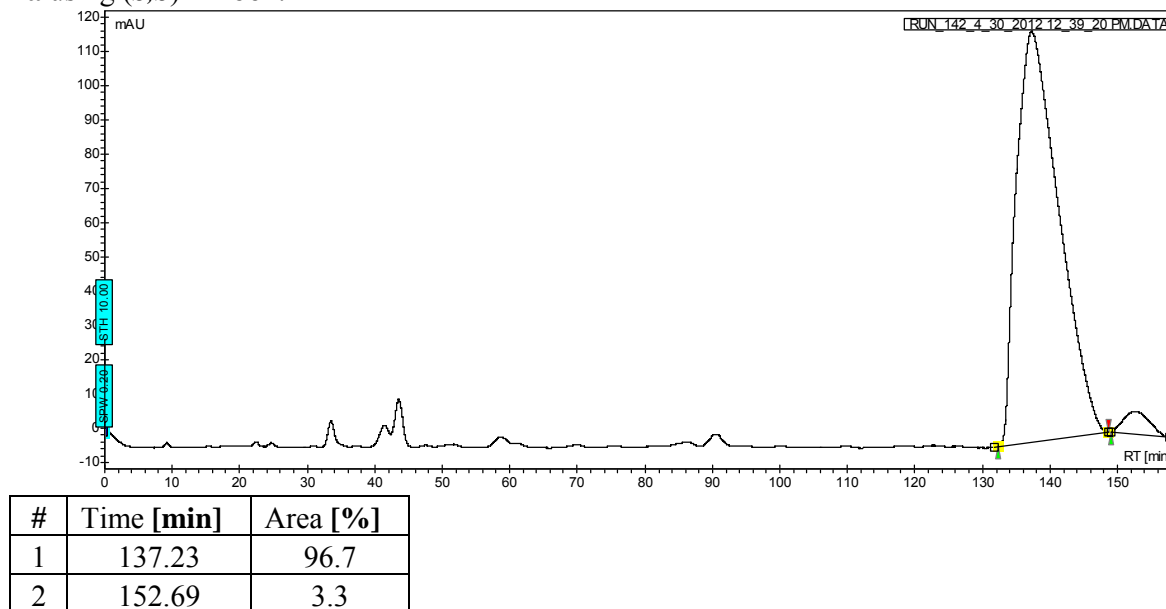

**2a** using (S)-*i*-Pr-QUINOX:

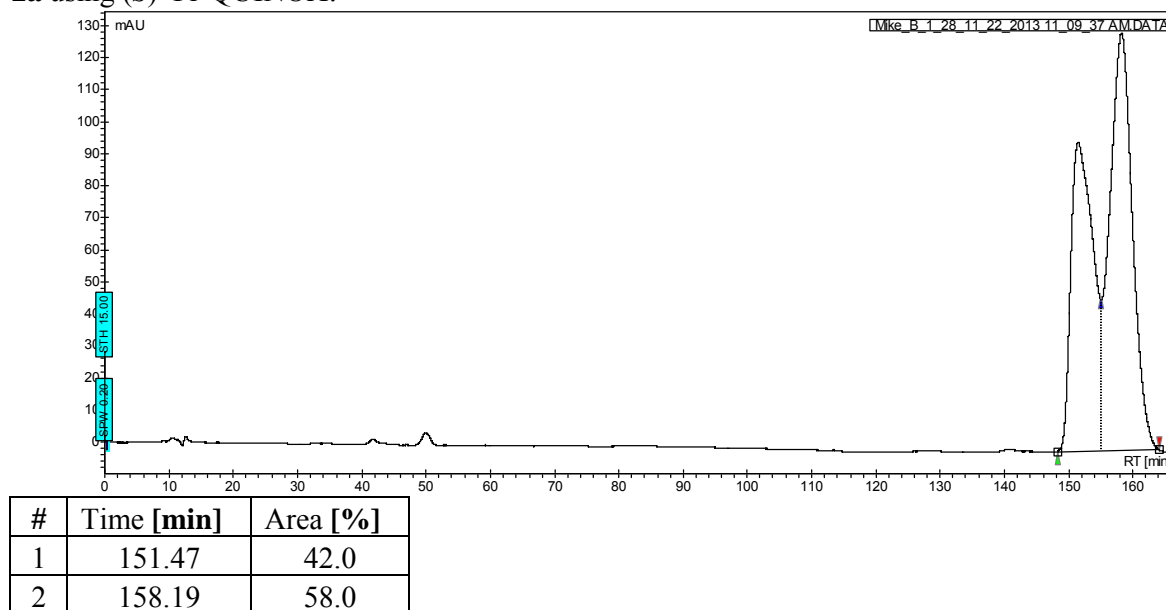

**2a** using (*R,R*)-Ph-box:

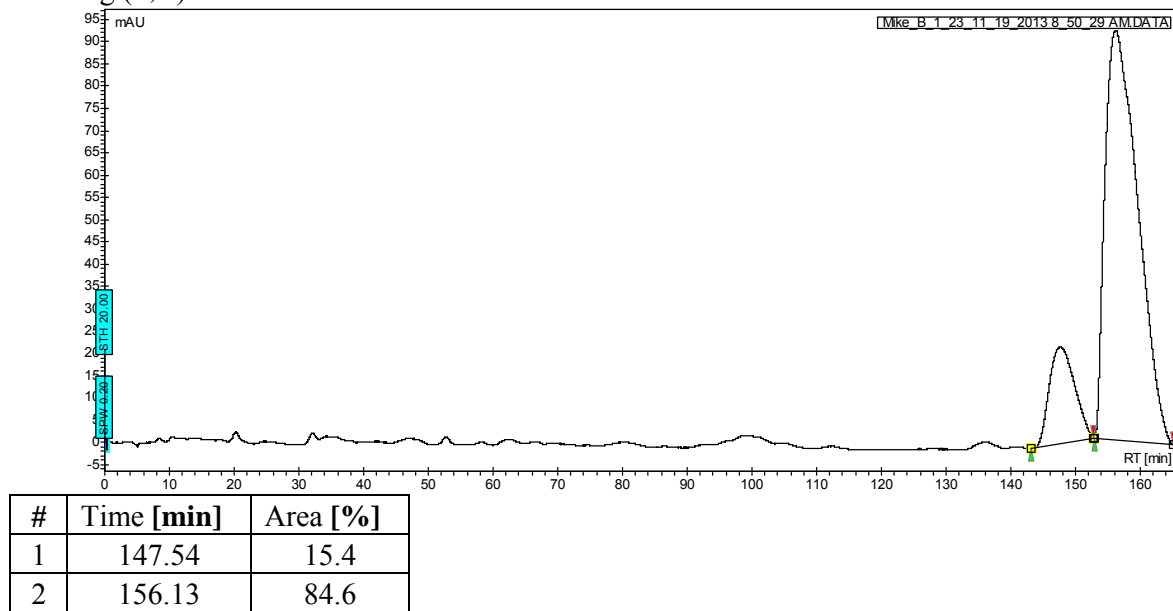

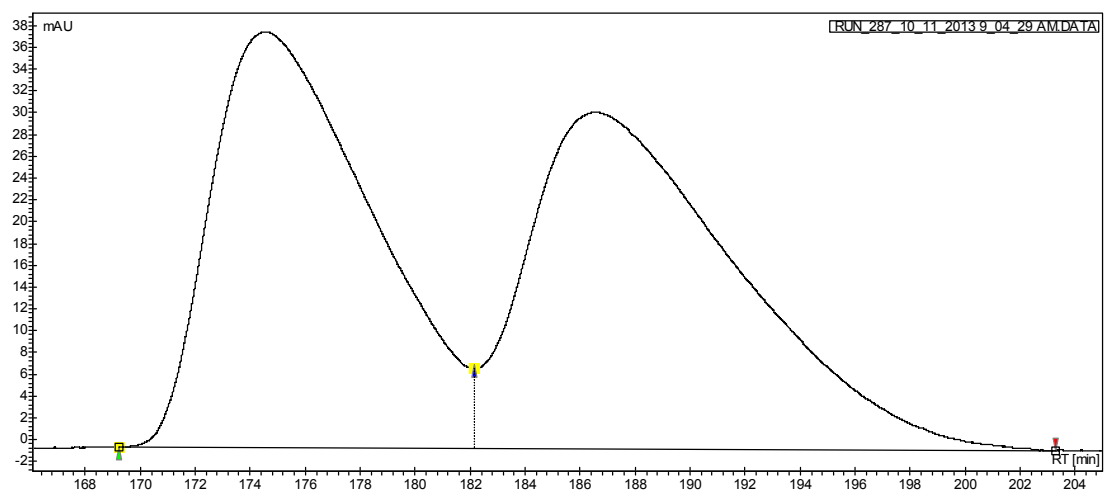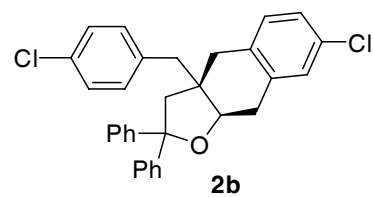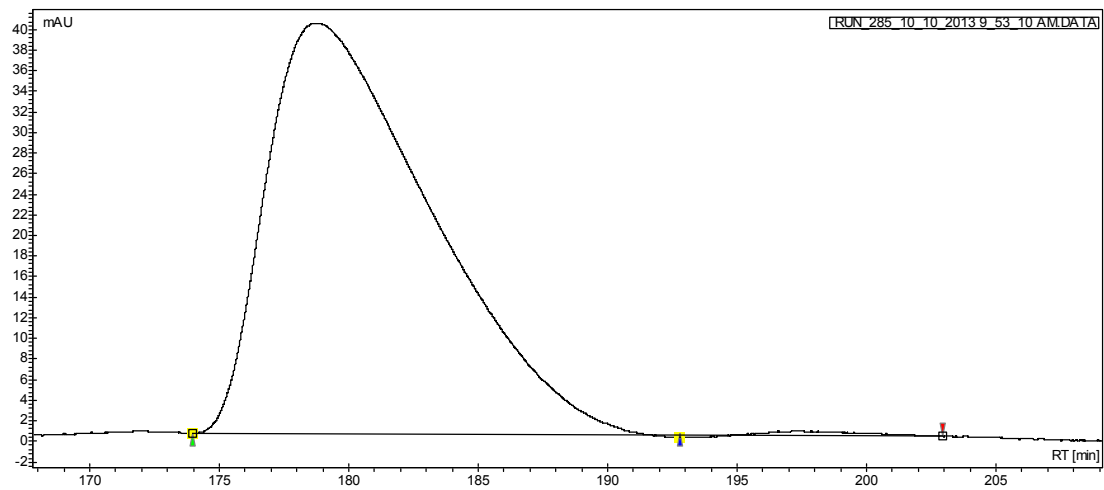

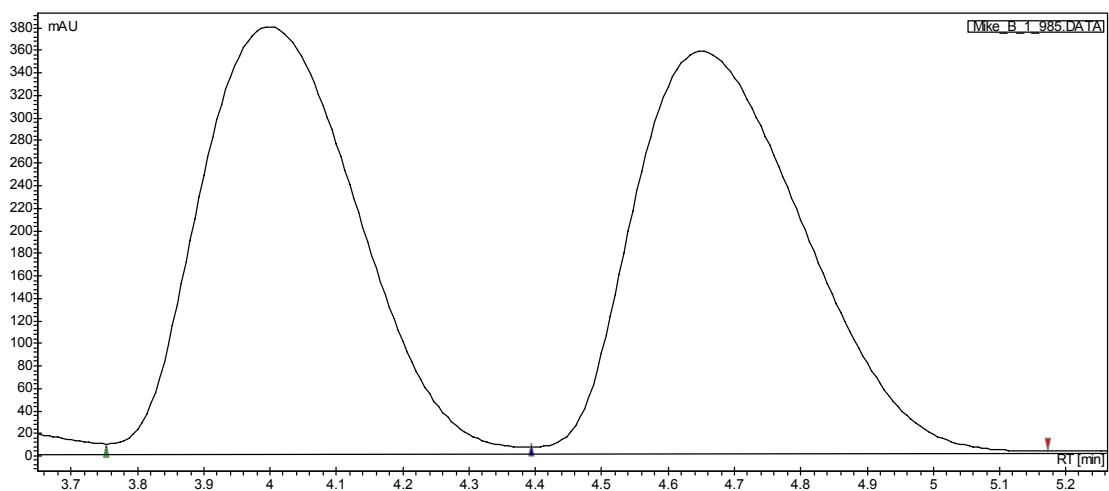

| # | Time [min] | Area [%] |
|---|------------|----------|
| 1 | 4.00       | 49.6     |
| 2 | 4.65       | 50.4     |

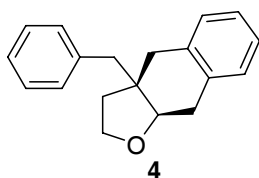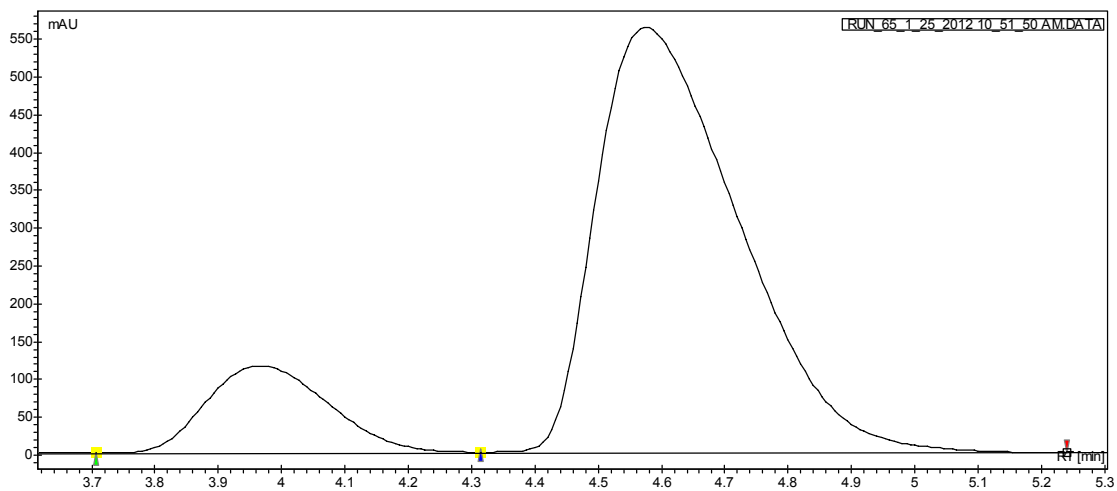

| # | Time [min] | Area [%] |
|---|------------|----------|
| 1 | 3.97       | 15.0     |
| 2 | 4.57       | 85.0     |

(4) using (*S,S*)-*i*Pr-box:

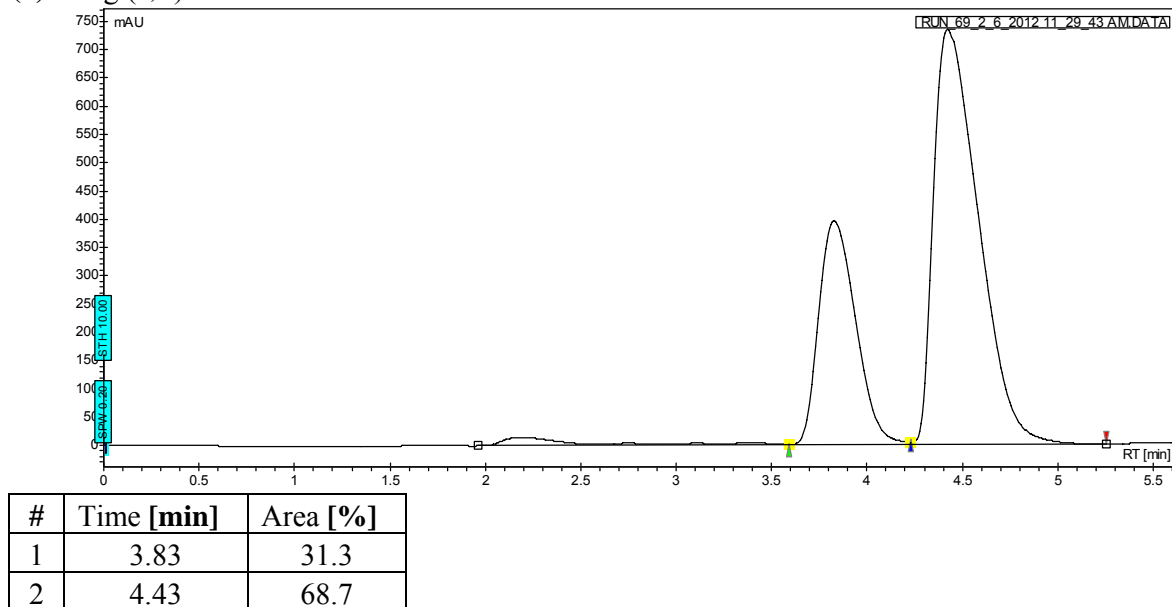

(4) using (*S*)-*i*Pr-QUINOX:

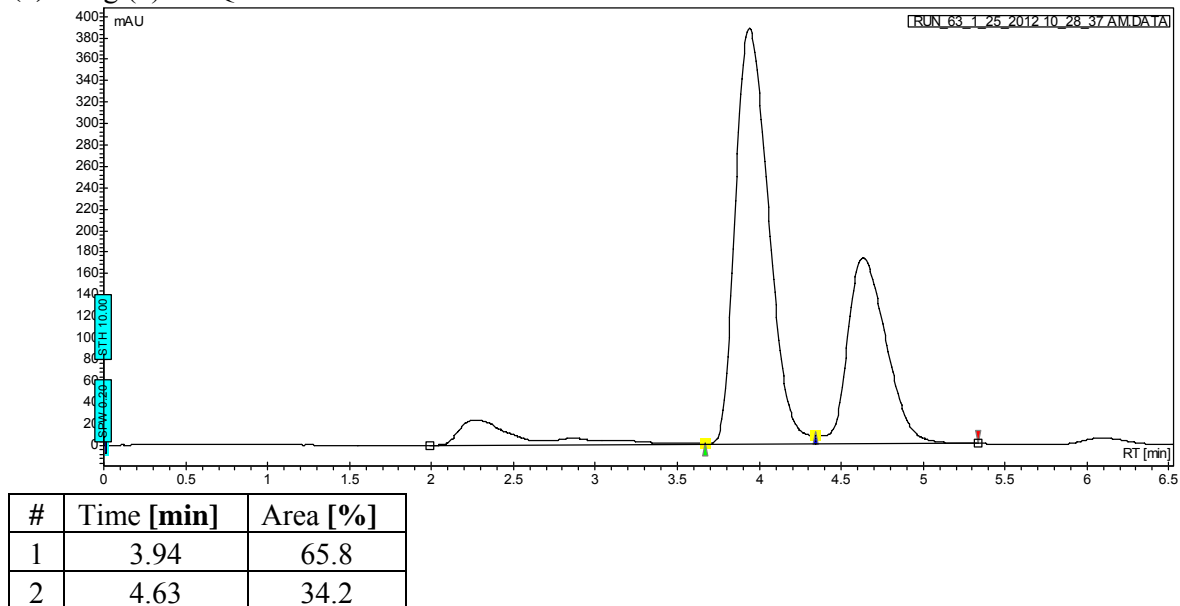

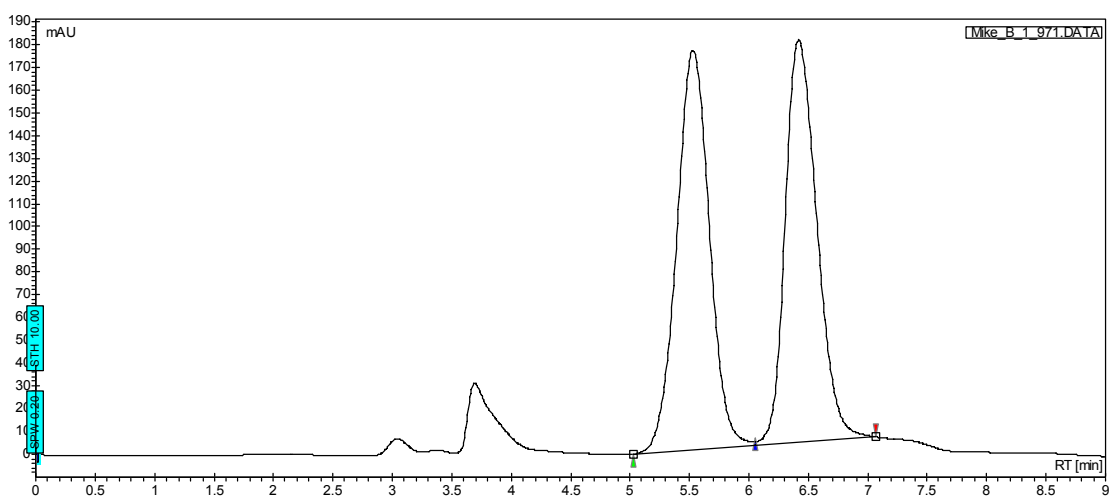

| # | Time [min] | Area [%] |
|---|------------|----------|
| 1 | 5.53       | 50.7     |
| 2 | 6.42       | 49.3     |

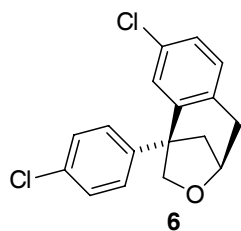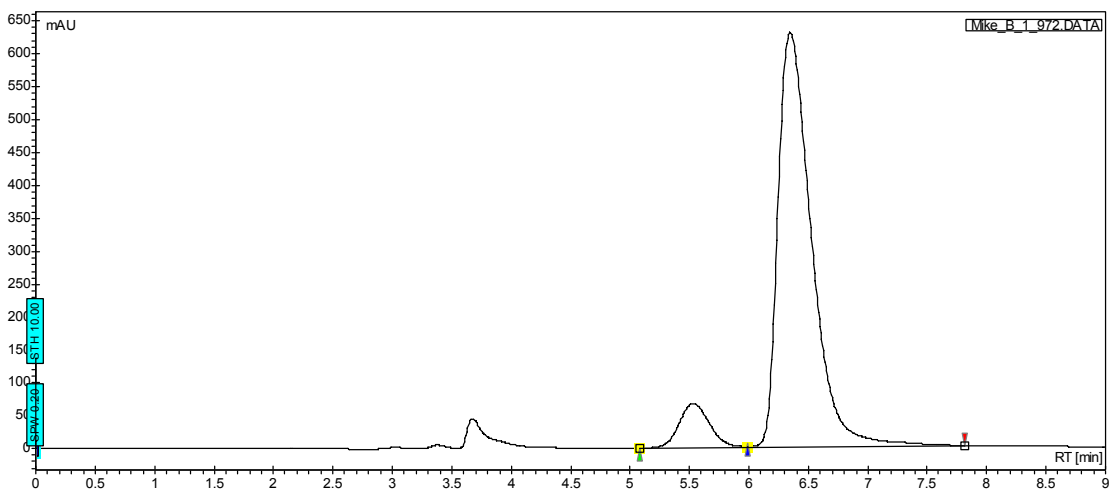

| # | Time [min] | Area [%] |
|---|------------|----------|
| 1 | 5.53       | 8.9      |
| 2 | 6.35       | 91.1     |

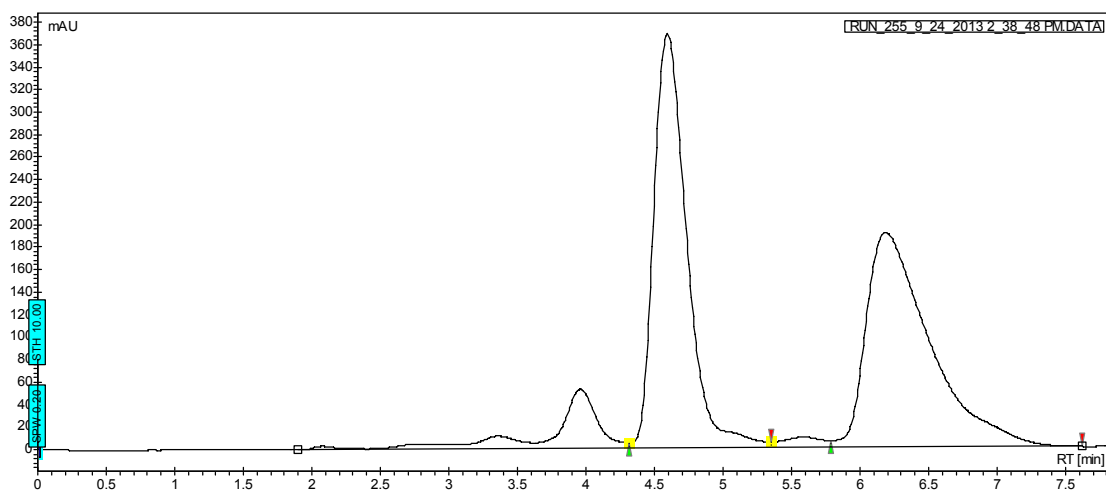

| # | Time [min] | Area [%] |
|---|------------|----------|
| 1 | 4.59       | 50.0     |
| 2 | 6.18       | 50.0     |

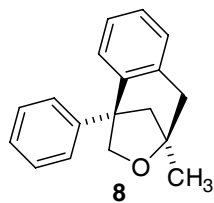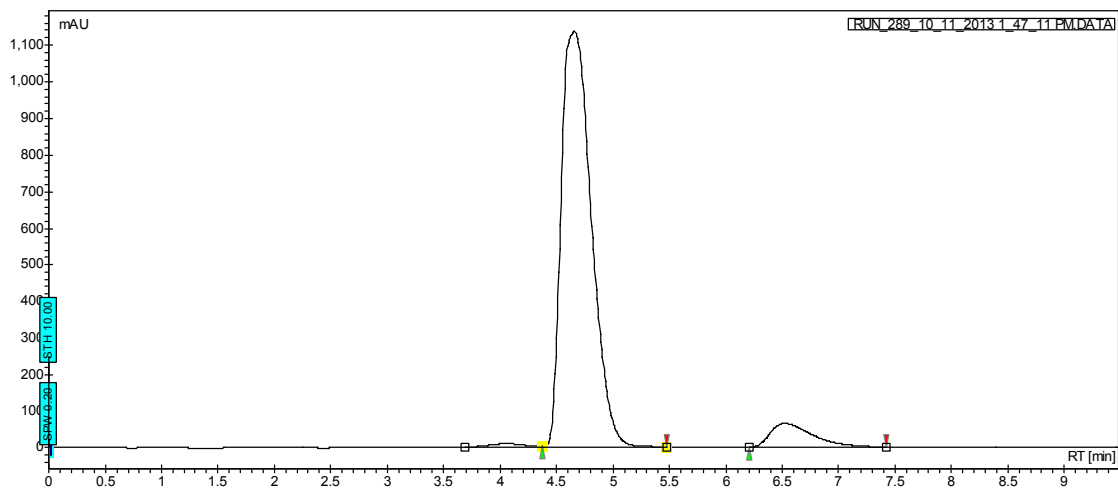

| # | Time [min] | Area [%] |
|---|------------|----------|
| 1 | 4.65       | 92.6     |
| 2 | 6.53       | 7.4      |

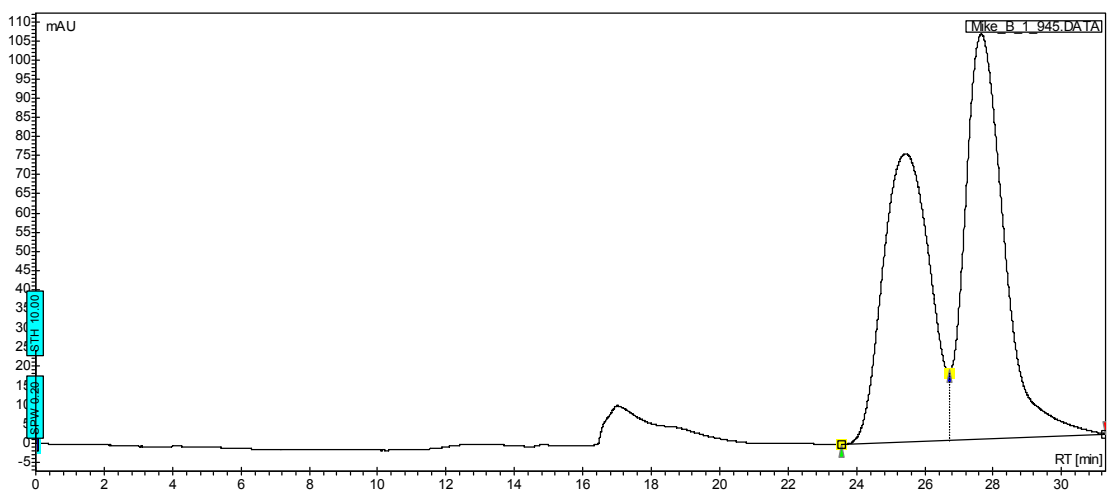

| # | Time [min] | Area [%] |
|---|------------|----------|
| 1 | 25.43      | 45.9     |
| 2 | 27.65      | 54.1     |

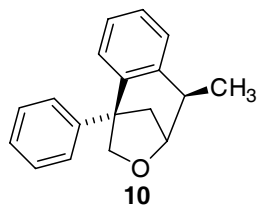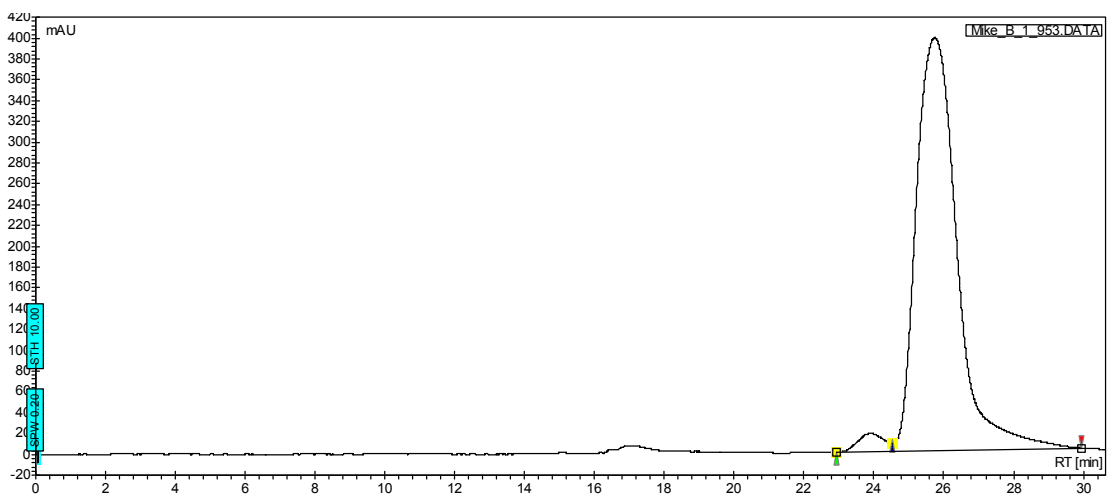

| # | Time [min] | Area [%] |
|---|------------|----------|
| 1 | 23.91      | 2.8      |
| 2 | 25.74      | 97.2     |

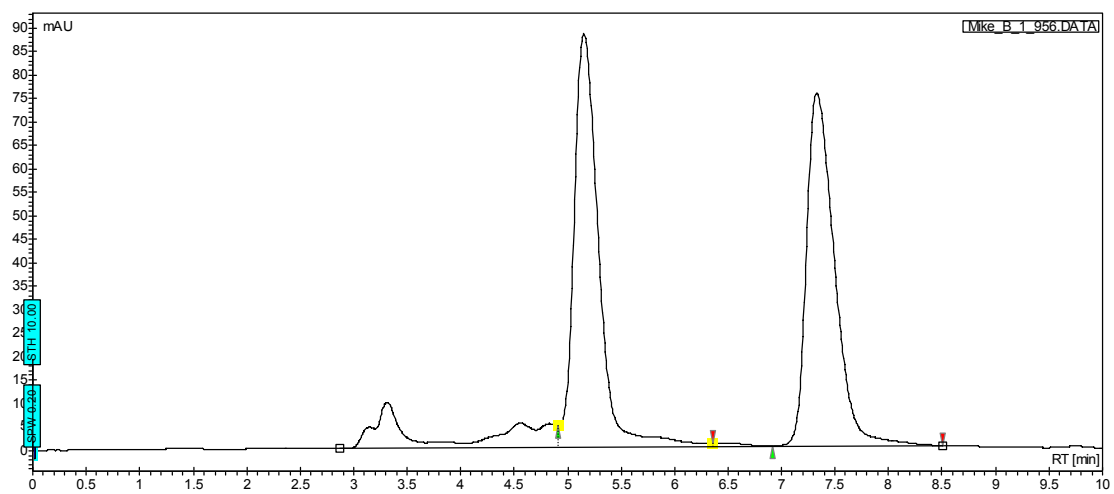

| # | Time [min] | Area [%] |
|---|------------|----------|
| 1 | 5.15       | 50.9     |
| 2 | 7.33       | 49.1     |

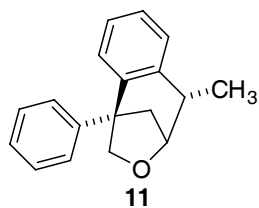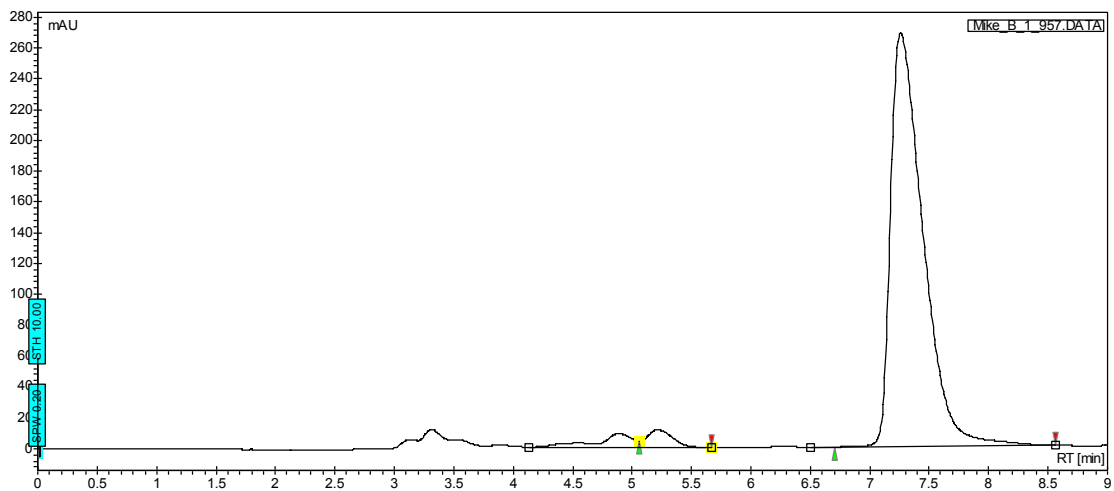

| # | Time [min] | Area [%] |
|---|------------|----------|
| 1 | 5.22       | 3.2      |
| 2 | 7.26       | 96.8     |

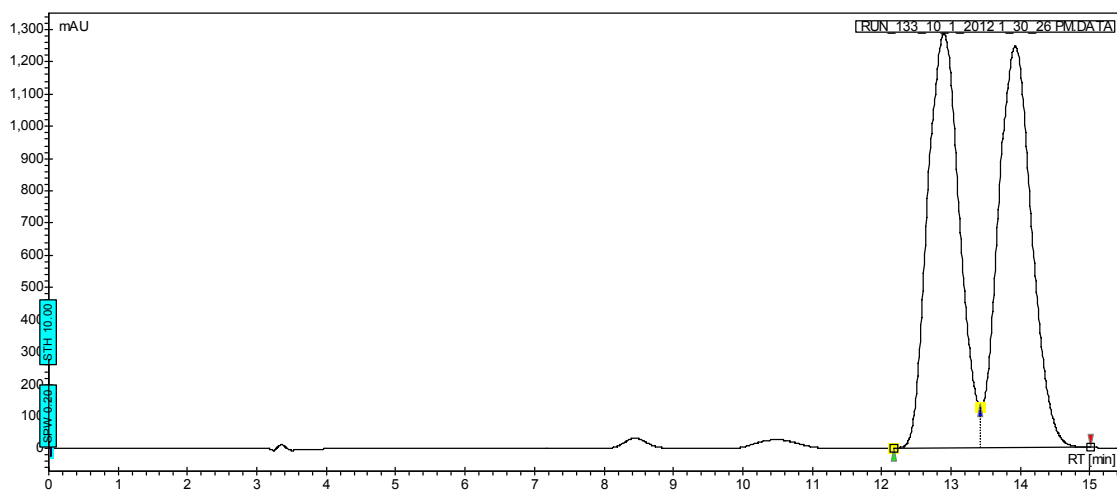

| # | Time [min] | Area [%] |
|---|------------|----------|
| 1 | 12.89      | 49.5     |
| 2 | 13.93      | 50.5     |

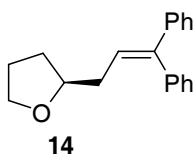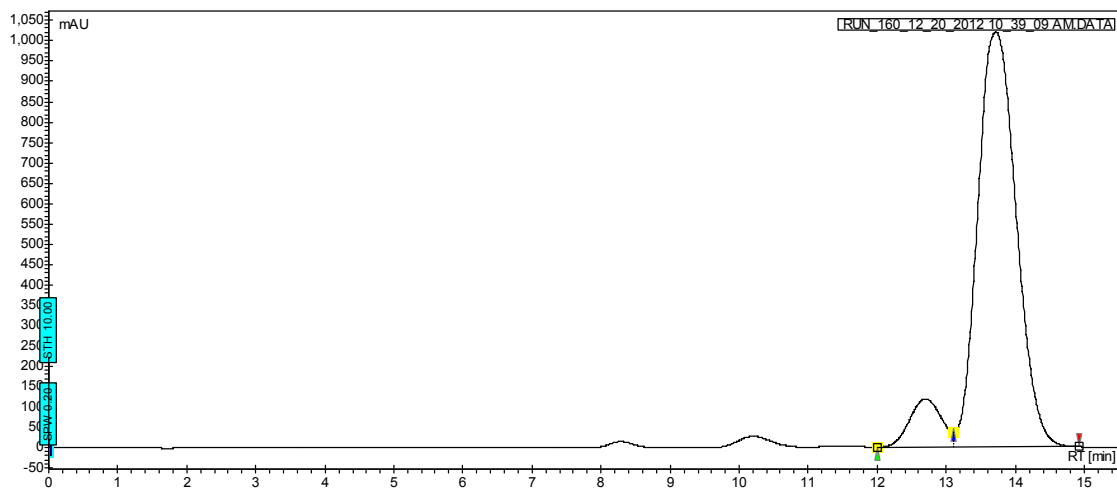

| # | Time [min] | Area [%] |
|---|------------|----------|
| 1 | 12.69      | 8.7      |
| 2 | 13.90      | 91.3     |

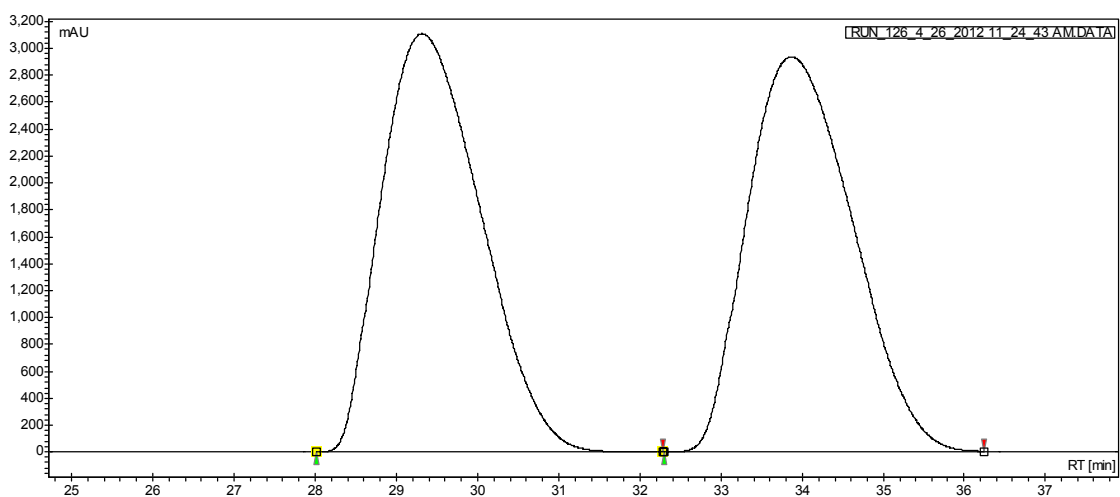

| # | Time [min] | Area [%] |
|---|------------|----------|
| 1 | 29.32      | 50.0     |
| 2 | 33.87      | 50.0     |

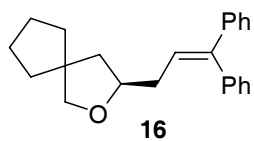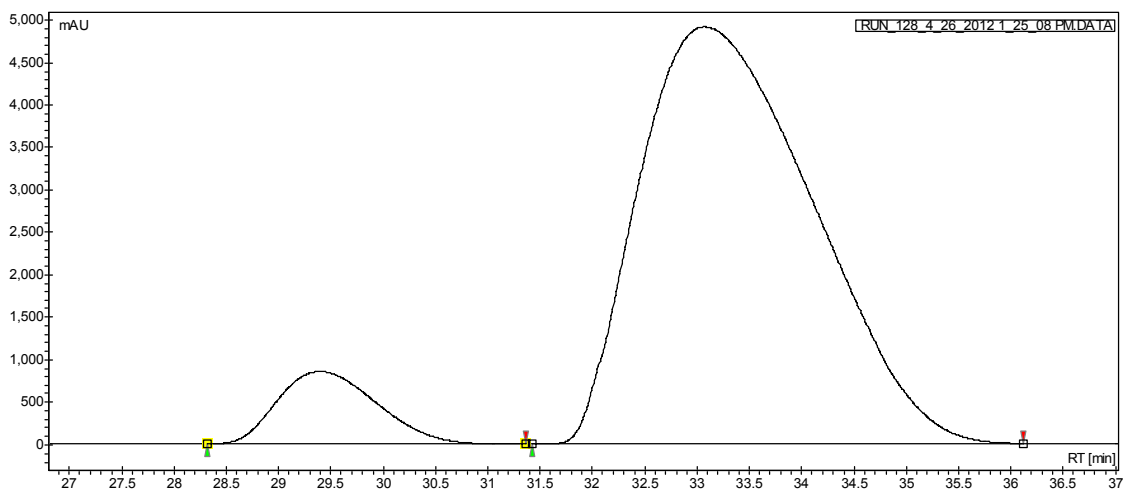

| # | Time [min] | Area [%] |
|---|------------|----------|
| 1 | 29.39      | 9.1      |
| 2 | 33.07      | 90.9     |

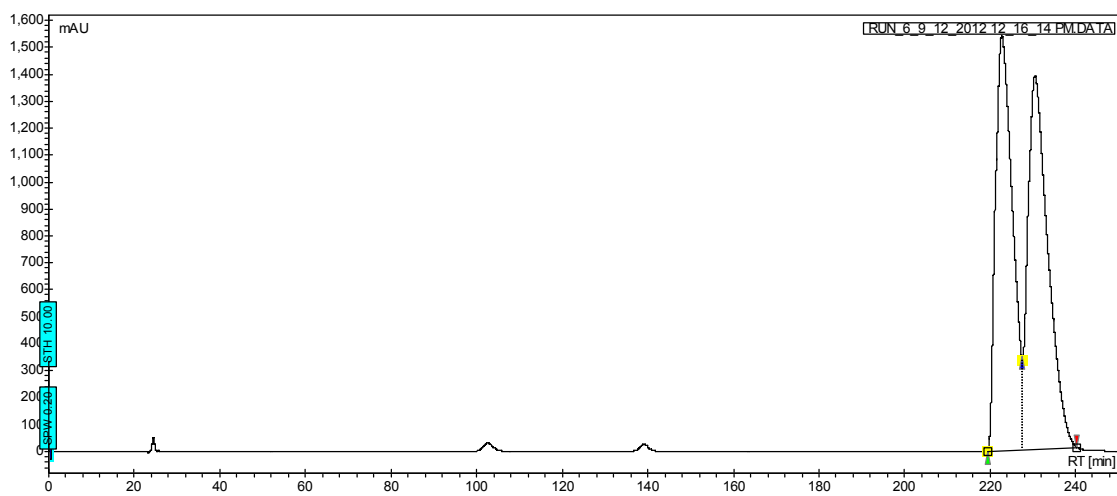

| # | Time [min] | Area [%] |
|---|------------|----------|
| 1 | 222.73     | 48.4     |
| 2 | 230.45     | 51.6     |

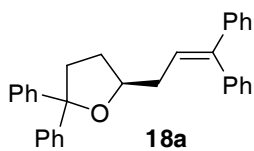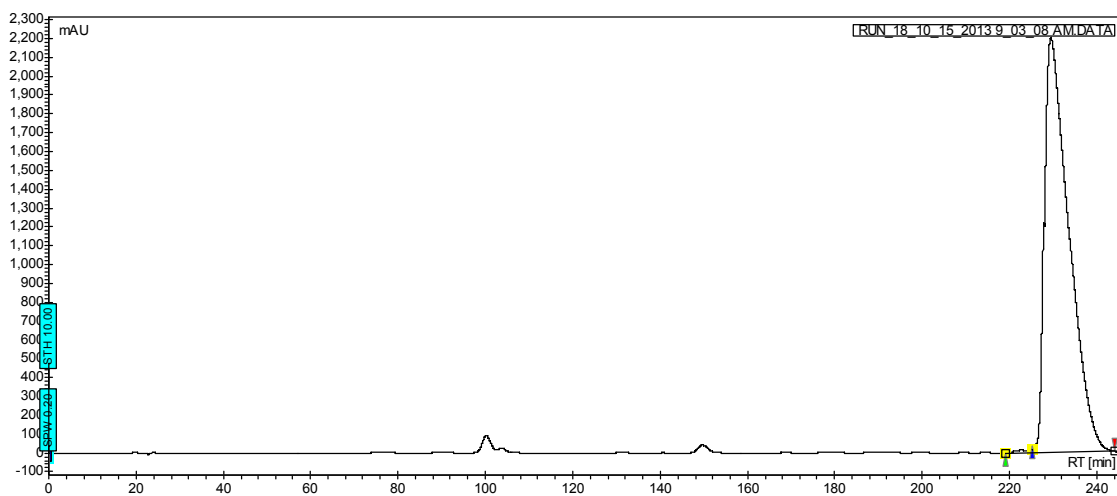

| # | Time [min] | Area [%] |
|---|------------|----------|
| 1 | 225.11     | 0.3      |
| 2 | 229.49     | 99.7     |

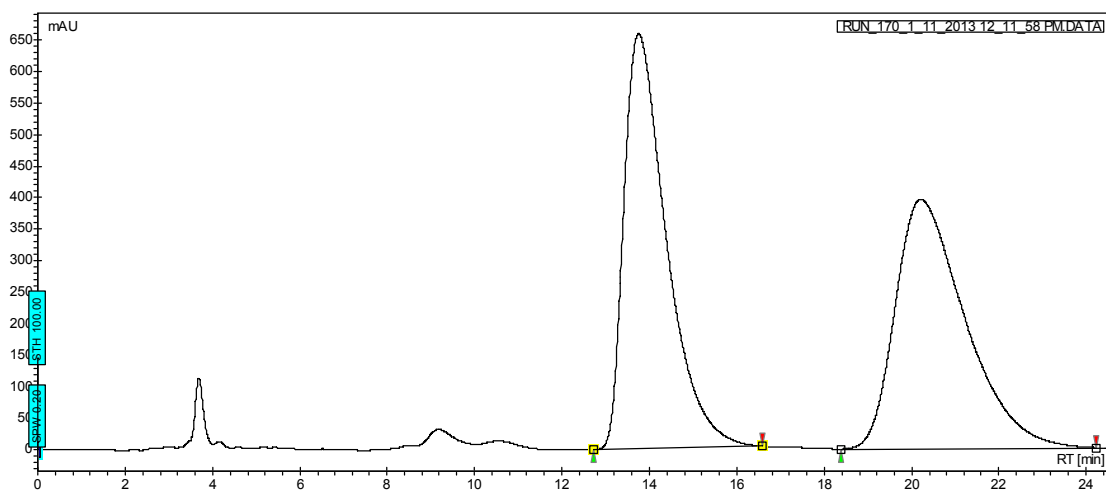

| # | Time [min] | Area [%] |
|---|------------|----------|
| 1 | 13.75      | 50.3     |
| 2 | 20.21      | 49.7     |

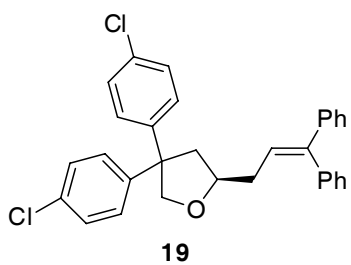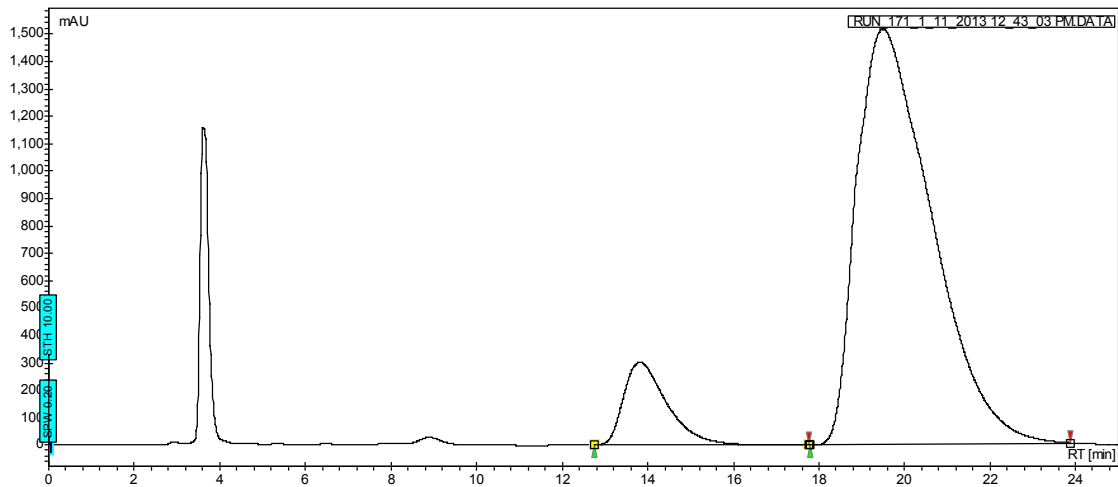

| # | Time [min] | Area [%] |
|---|------------|----------|
| 1 | 13.81      | 10.3     |
| 2 | 19.49      | 89.7     |

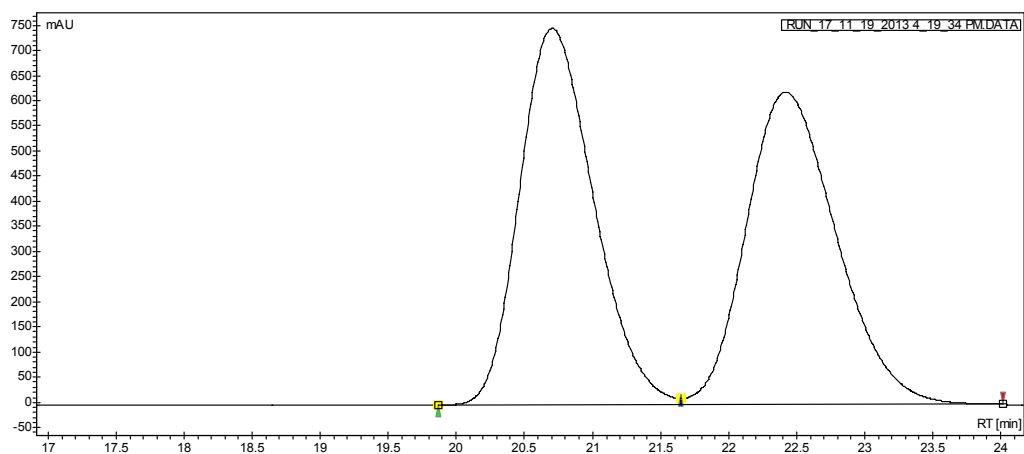

| # | Time [min] | Area [%] |
|---|------------|----------|
| 1 | 20.71      | 49.83    |
| 2 | 22.42      | 50.17    |

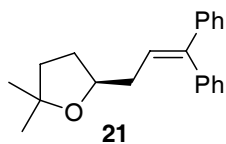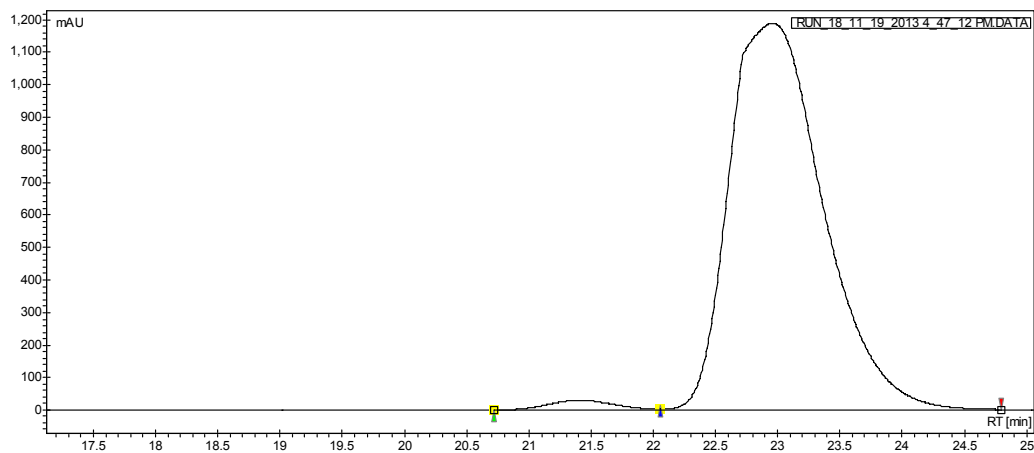

| # | Time [min] | Area [%] |
|---|------------|----------|
| 1 | 21.41      | 1.76     |
| 2 | 22.96      | 98.14    |

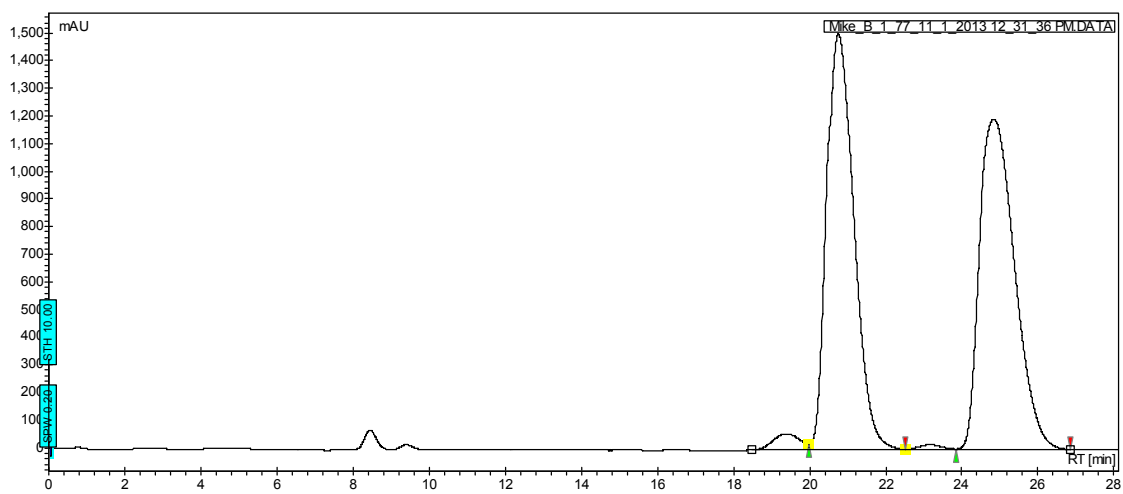

| # | Time [min] | Area [%] |
|---|------------|----------|
| 1 | 20.75      | 49.52    |
| 2 | 24.84      | 50.48    |

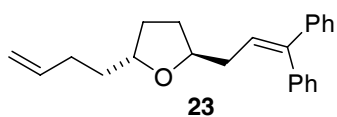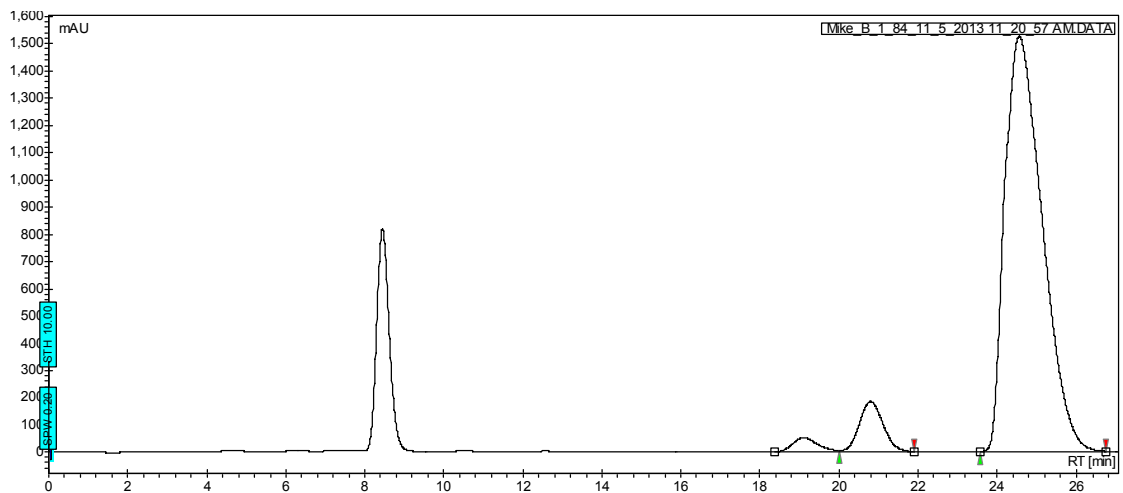

| # | Time [min] | Area [%] |
|---|------------|----------|
| 1 | 20.80      | 7.15     |
| 2 | 24.56      | 92.85    |

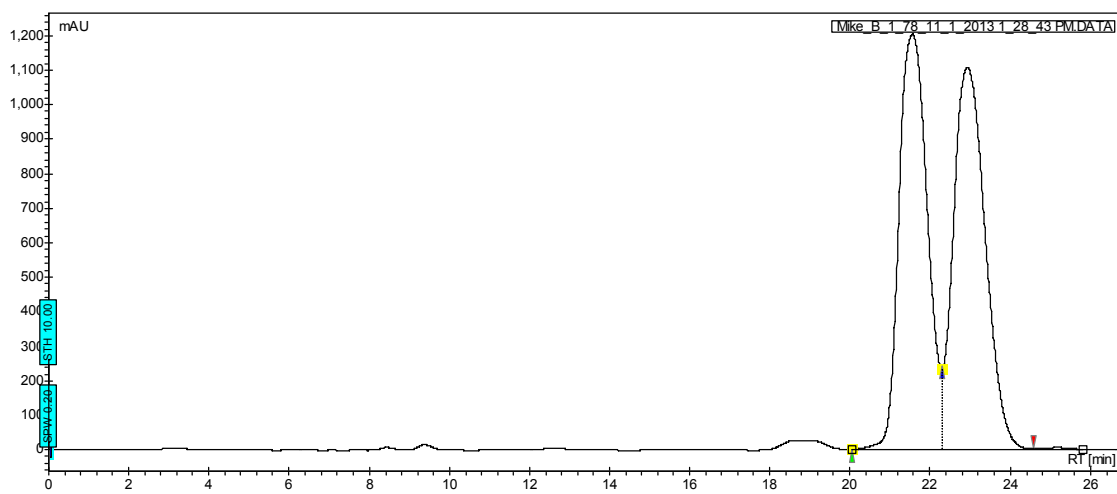

| # | Time [min] | Area [%] |
|---|------------|----------|
| 1 | 21.56      | 48.88    |
| 2 | 22.93      | 51.12    |

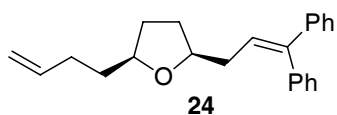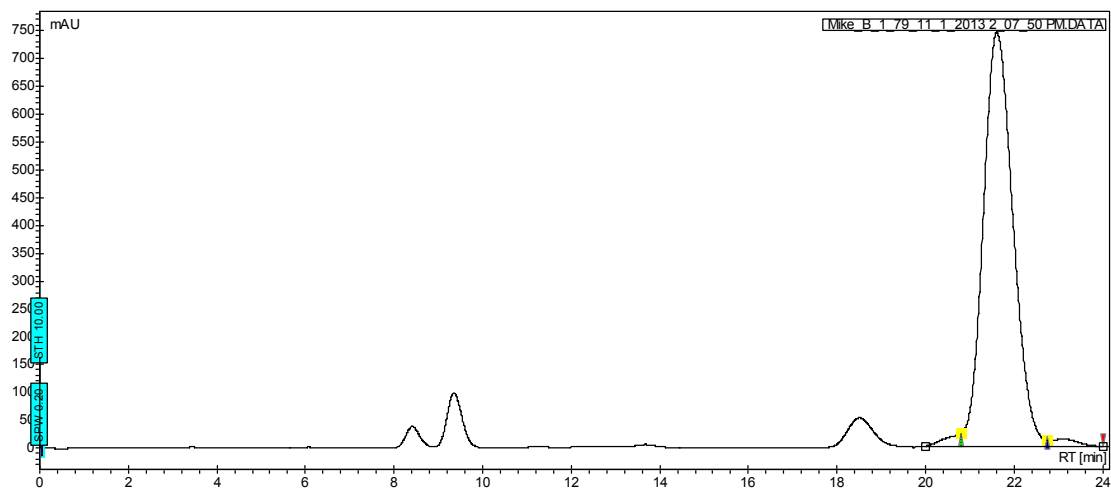

| # | Time [min] | Area [%] |
|---|------------|----------|
| 1 | 21.61      | 98.47    |
| 2 | 23.11      | 1.54     |

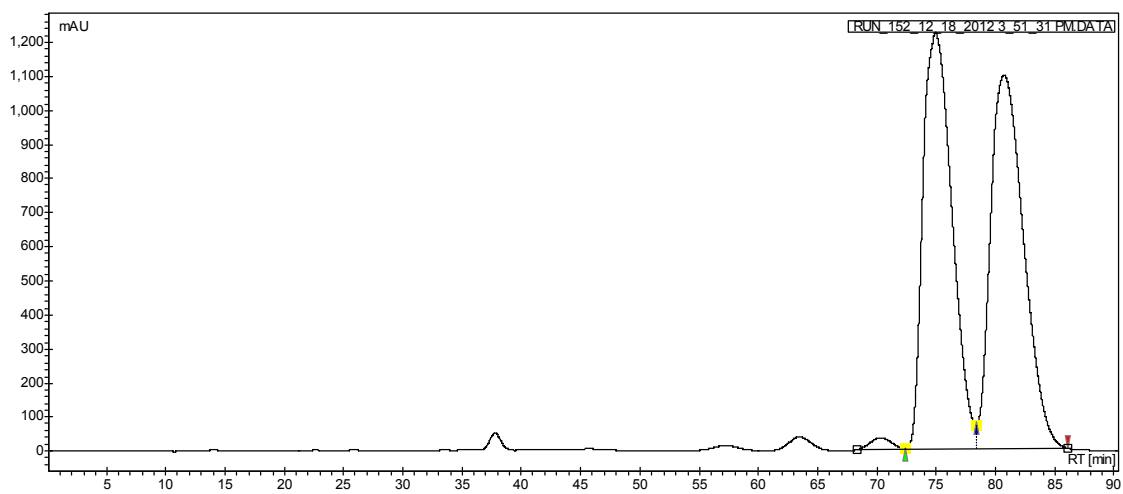

| # | Time [min] | Area [%] |
|---|------------|----------|
| 1 | 74.95      | 49.4     |
| 2 | 80.73      | 50.6     |

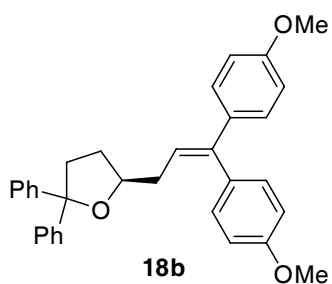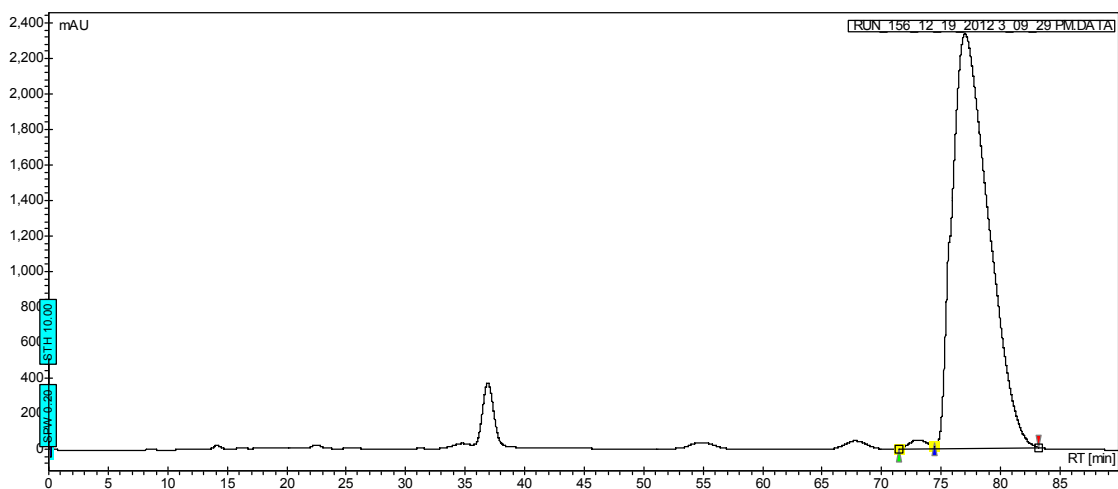

| # | Time [min] | Area [%] |
|---|------------|----------|
| 1 | 73.07      | 1.1      |
| 2 | 77.01      | 98.9     |

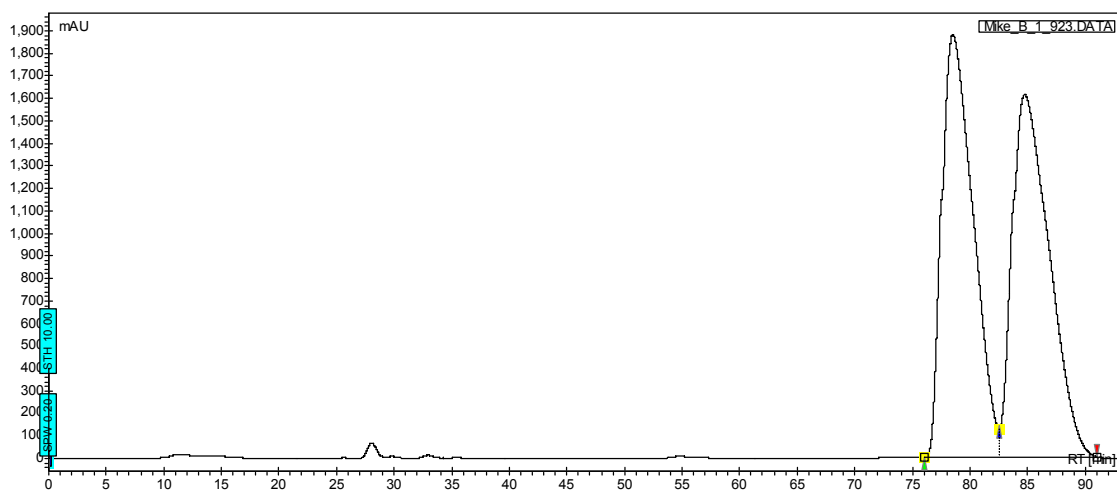

| # | Time [min] | Area [%] |
|---|------------|----------|
| 1 | 78.52      | 49.5     |
| 2 | 84.77      | 50.5     |

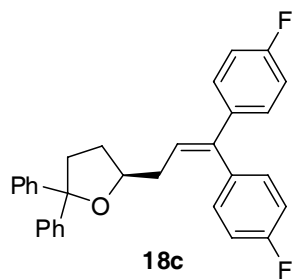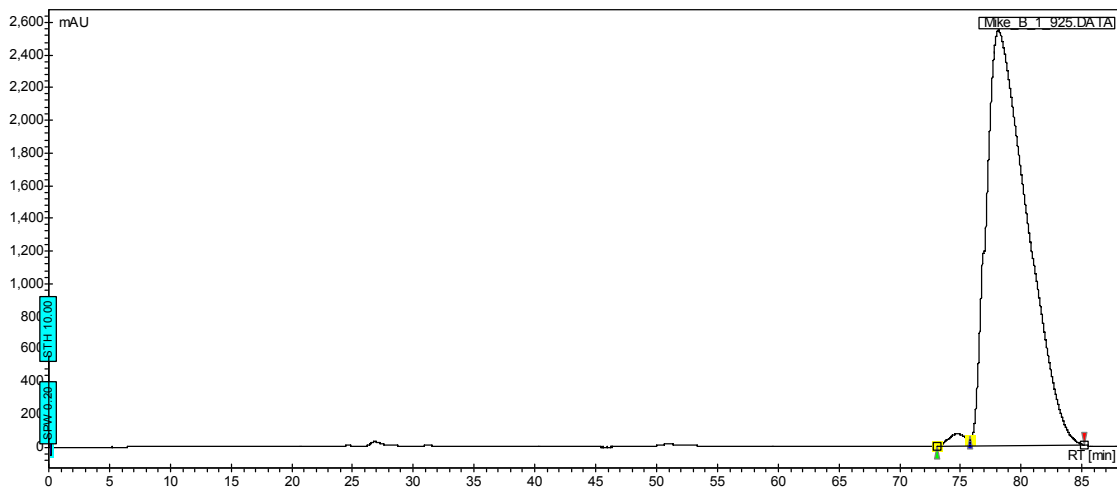

| # | Time [min] | Area [%] |
|---|------------|----------|
| 1 | 74.75      | 1.2      |
| 2 | 78.12      | 98.8     |

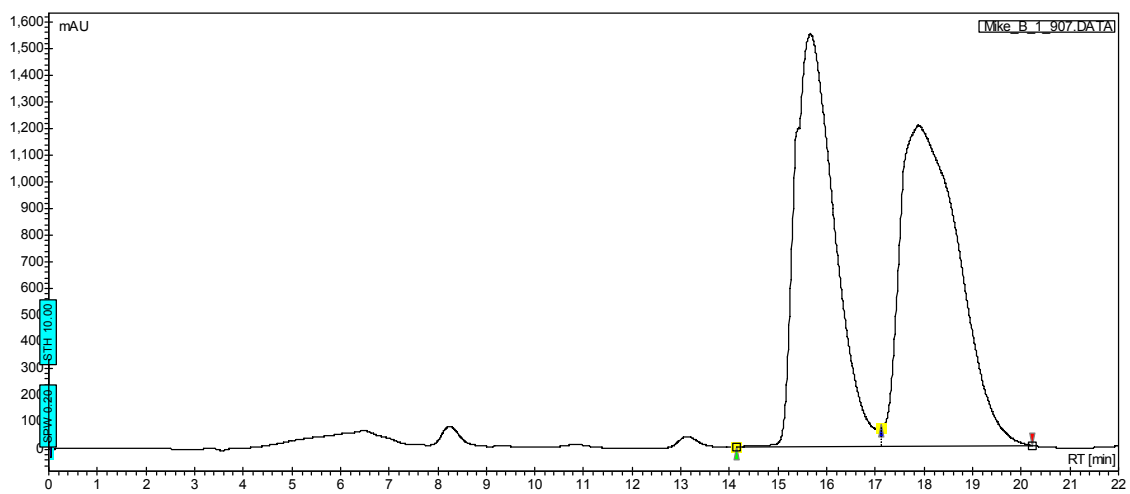

| # | Time [min] | Area [%] |
|---|------------|----------|
| 1 | 15.66      | 46.3     |
| 2 | 17.89      | 53.7     |

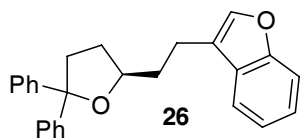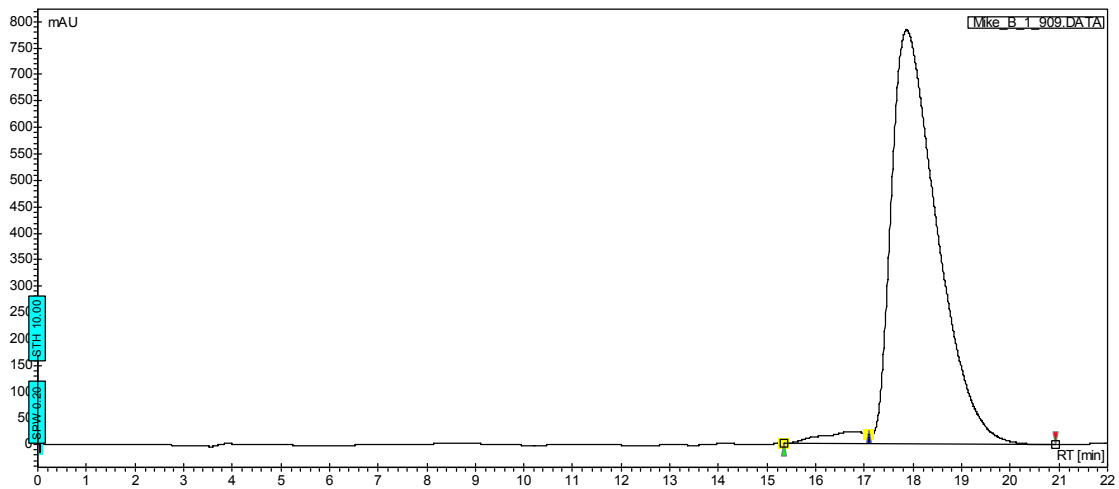

| # | Time [min] | Area [%] |
|---|------------|----------|
| 1 | 16.75      | 2.9      |
| 2 | 17.87      | 97.1     |

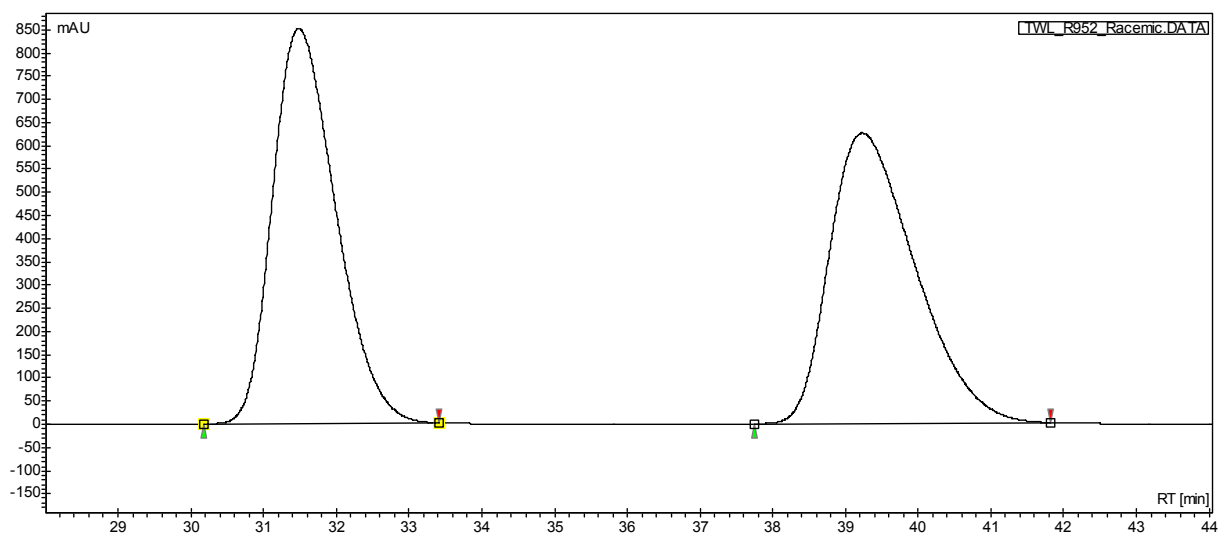

| # | Time [min] | Area [%] |
|---|------------|----------|
| 1 | 31.48      | 50.2     |
| 2 | 39.23      | 49.8     |

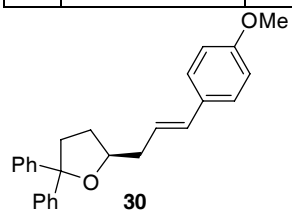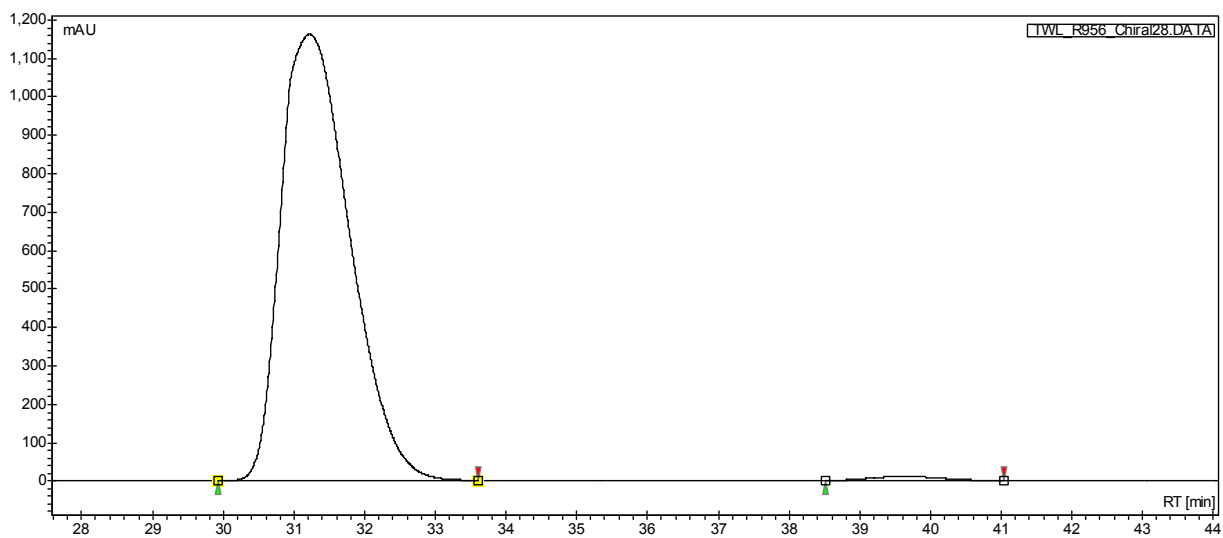

| # | Time [min] | Area [%] |
|---|------------|----------|
| 1 | 31.22      | 99.1     |
| 2 | 39.63      | 0.9      |

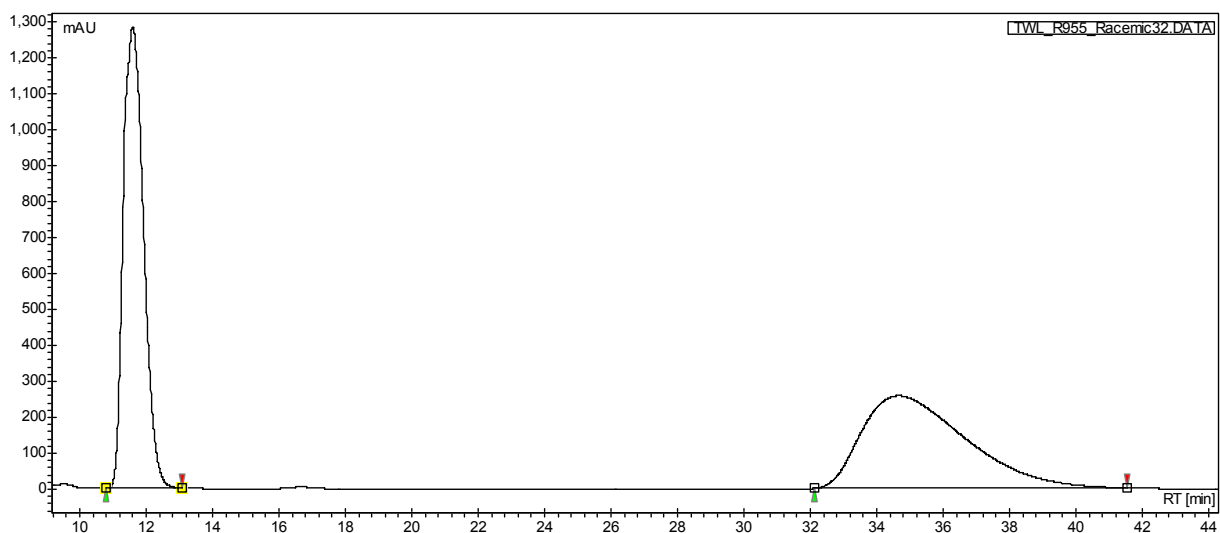

| # | Time [min] | Area [%] |
|---|------------|----------|
| 1 | 11.59      | 49.4     |
| 2 | 34.67      | 50.6     |

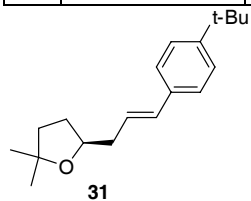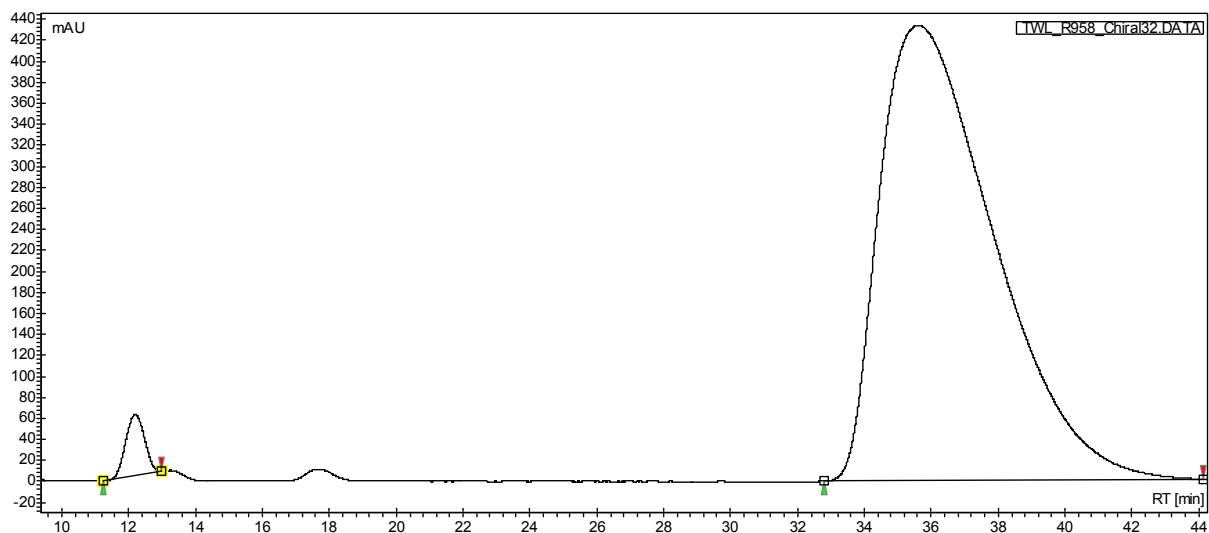

| # | Time [min] | Area [%] |
|---|------------|----------|
| 1 | 12.19      | 2.2      |
| 2 | 35.61      | 97.8     |

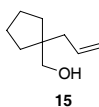

Sample Name:  
 Data Collected on:  
 roesy.chem.buffalo.edu-mercury300  
 Archive directory:  
 Sample directory:  
 FidFile: PROTON  
 Pulse Sequence: PROTON (s2pu1)  
 Solvent: cdcl3  
 Data Collected on: Aug 27 2013  
 Temp. 25.0 C / 298.1 K  
 Operator: Sherry  
 Relax. delay 1.000 sec  
 Pulse 45.0 degrees  
 Acq. time 1.705 sec  
 Width 4809.1 Hz  
 8 repetitions  
 OBSERVE H1, 300.0738816 MHz  
 DATA PROCESSING  
 FT size 16384  
 Total time 0 min 23 sec

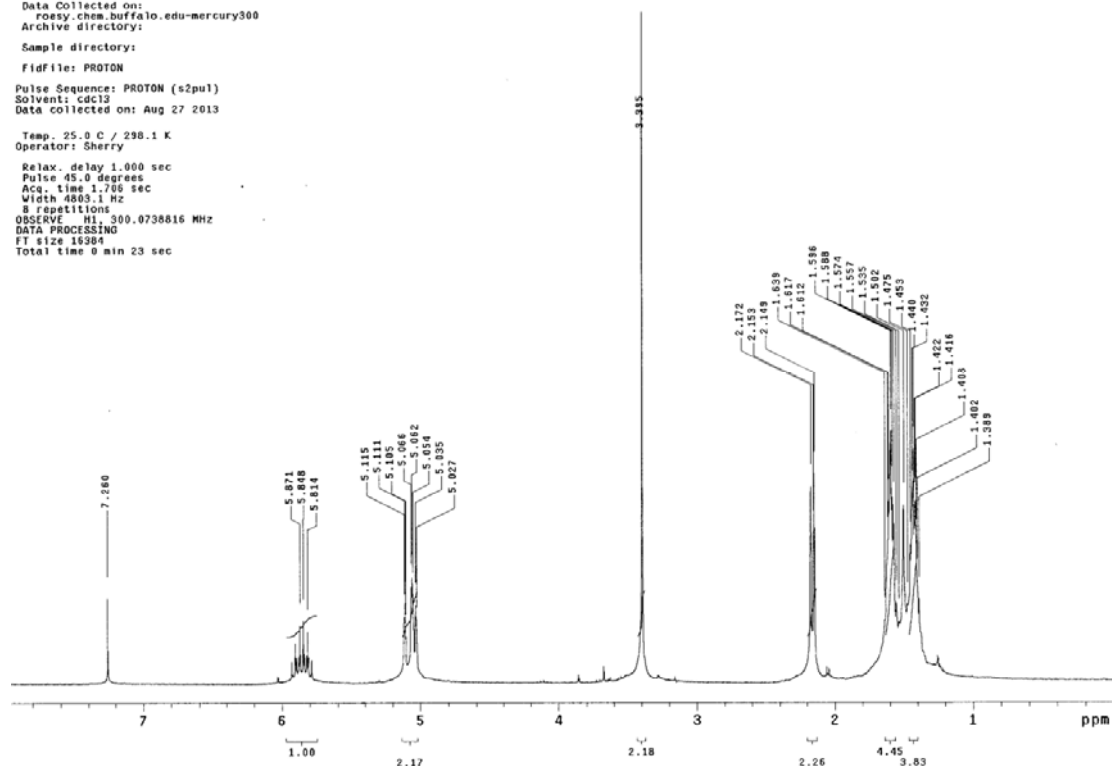

STANDARD CARBON PARAMETERS  
 Sample Name:  
 Data Collected on:  
 roesy.chem.buffalo.edu-mercury300  
 Archive directory:  
 Sample directory:  
 FidFile: CARBON  
 Pulse Sequence: CARBON (s2pu1)  
 Solvent: cdcl3  
 Data collected on: Aug 27 2013  
 Temp. 25.0 C / 298.1 K  
 Operator: Sherry  
 Relax. delay 8.000 sec  
 Pulse 45.0 degrees  
 Acq. time 0.868 sec  
 Width 10867.9 Hz  
 5888 repetitions  
 OBSERVE C13, 75.4536375 MHz  
 DECOUPLE H1, 300.0754430 MHz  
 Power 38 dB  
 continuously on  
 WALTZ-16 modulated  
 DATA PROCESSING  
 Line broadening 0.5 Hz  
 FT size 32768  
 Total time 15 hr, 14 min

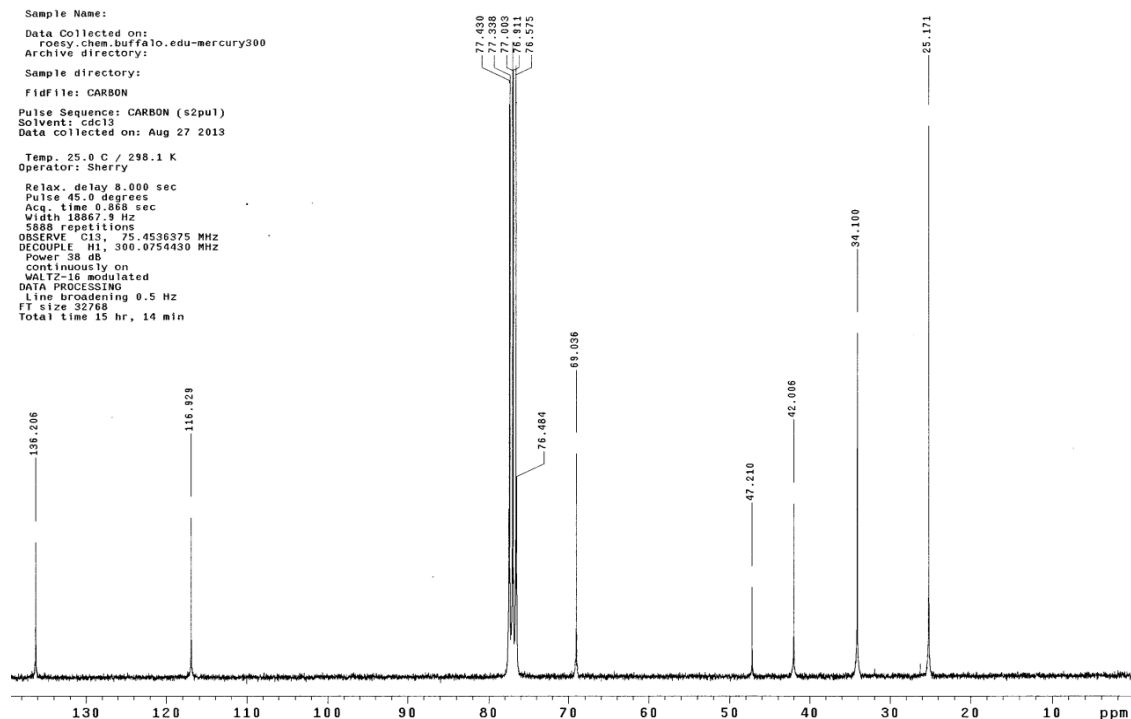

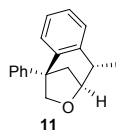

Sample Name:  
 Data Collected on:  
 chemmr400.chem.buffalo.edu-inova400  
 Archive directory:  
 Sample directory:  
 FIDFile: PROTON  
 Pulse Sequence: PROTON (s2pu1)  
 Solvent: cdcl3  
 Data collected on: Nov 5 2013  
 Operator: Chemler  
 Relax. delay 1.000 sec  
 Pulse 45.0 degrees  
 Acq. time 2.565 sec  
 Width 6387.7 Hz  
 8 repetitions  
 OBSERVE H1, 499.9239023 MHz  
 DATA PROCESSING  
 FT size 32768  
 Total time 70 min 23 sec

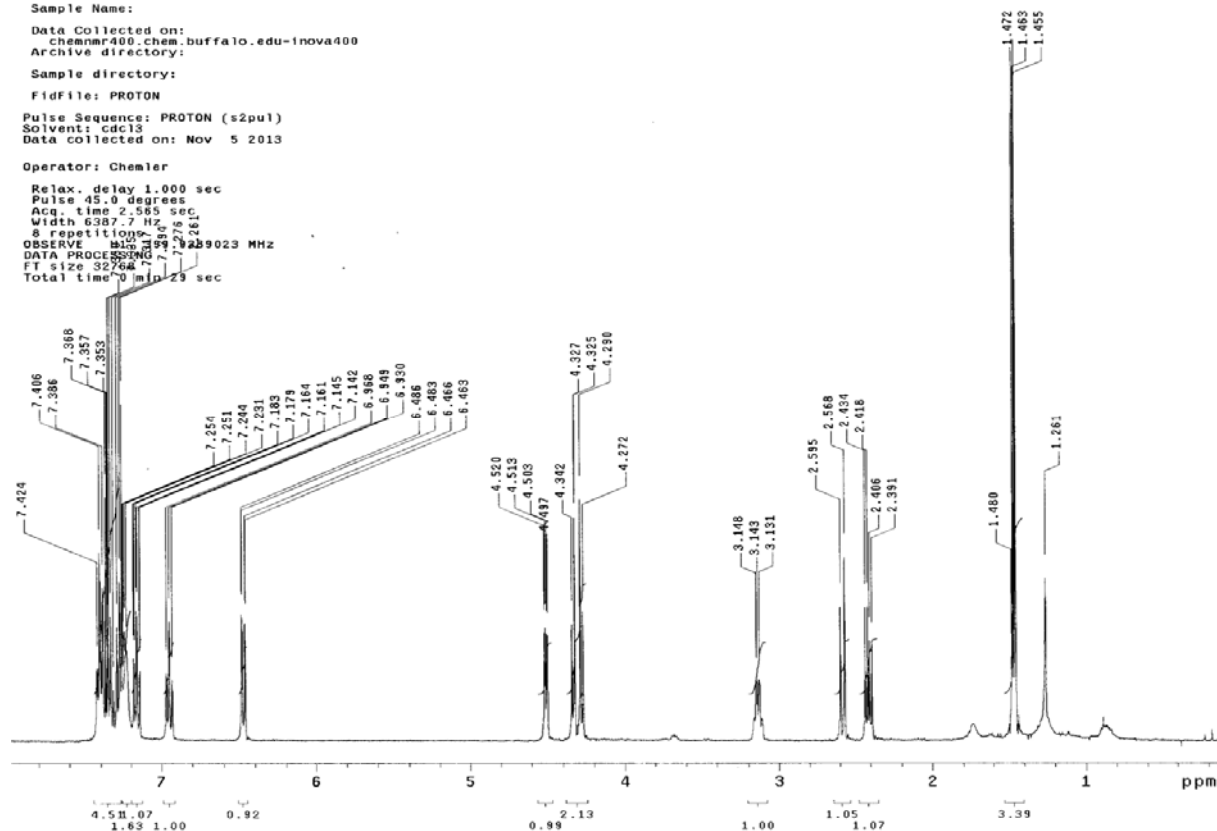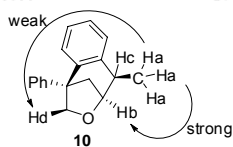

Selective band center: 1.46 (ppm); width: 10.3 (Hz)  
 Sample Name:  
 Data Collected on:  
 chemmr500.chem.buffalo.edu-inova500  
 Archive directory:  
 Sample directory:  
 FIDFile: NOESY10  
 Pulse Sequence: NOESY10  
 Solvent: cdcl3  
 Data collected on: Nov 1 2013  
 Temp: 25.0 C / 298.1 K  
 Operator: Chemler  
 Relax. delay 1.000 sec  
 Pulse 90.0 degrees  
 Acq. time 2.048 sec  
 Width 8000.0 Hz  
 12000 repetitions  
 OBSERVE H1, 499.8983908 MHz  
 DATA PROCESSING  
 FT size 32768  
 Total time 18 hr, 24 min

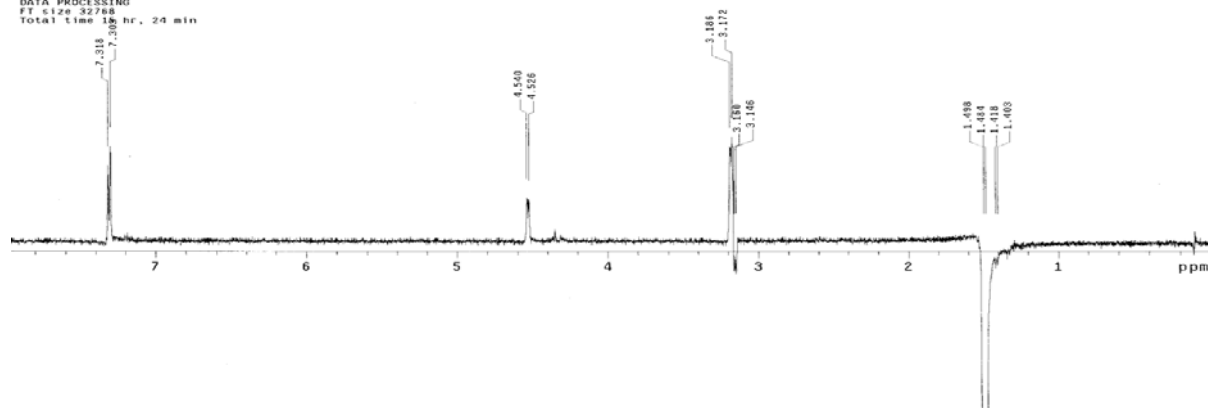

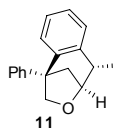

Sample Name:  
 Data Collected on: chemr400.chem.buffalo.edu-inova400  
 Archive directory:  
 Sample directory:  
 FidFile: PROTON  
 Pulse Sequence: PROTON (s2pul)  
 Solvent: cdcl3  
 Data collected on: Sep 27 2013  
 Operator: Chemler  
 Relax. delay 1.000 sec  
 Pulse 45.0 degrees  
 Acq. time 2.565 sec  
 Width 6387.7 Hz  
 8 repetitions  
 OBSERVE H1 399.9389023 MHz  
 DATA PROCESSING  
 FT size 32768  
 Total time 0 min 29 sec

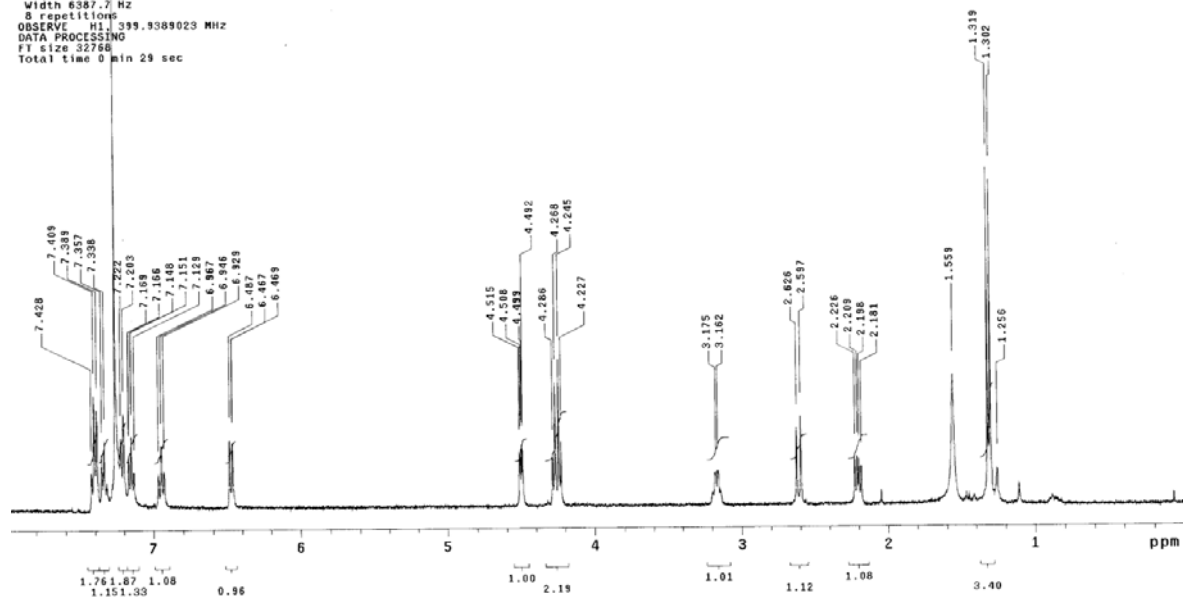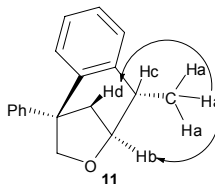

Selective band center: 3.96 (ppm); width: 30.0 (Hz)  
 Selective band center: 1.34 (ppm); width: 9.3 (Hz)

Sample Name:  
 Data collected on: nmr500c.chem.buffalo.edu-inova500  
 Archive directory:  
 Sample directory:  
 FidFile: NOESY1D  
 Pulse Sequence: NOESY1D  
 Solvent: cdcl3  
 Data collected on: Nov 14 2013  
 Temp. 25.0 °C / 298.1 K  
 Operator: Chemler  
 Relax. delay 1.000 sec  
 Pulse 90.0 degrees  
 Acq. time 2.945 sec  
 Width 8000.0 Hz  
 11872 repetitions  
 OBSERVE H1 499.8983908 MHz  
 DATA PROCESSING  
 FT size 32768  
 Total time 36 min 43 sec

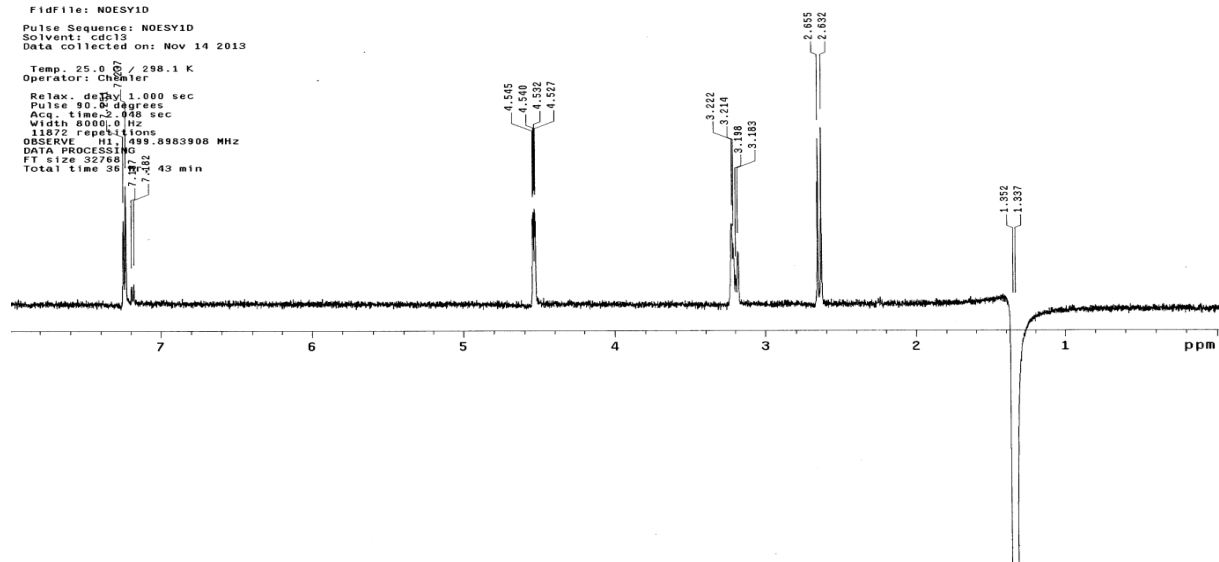

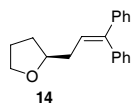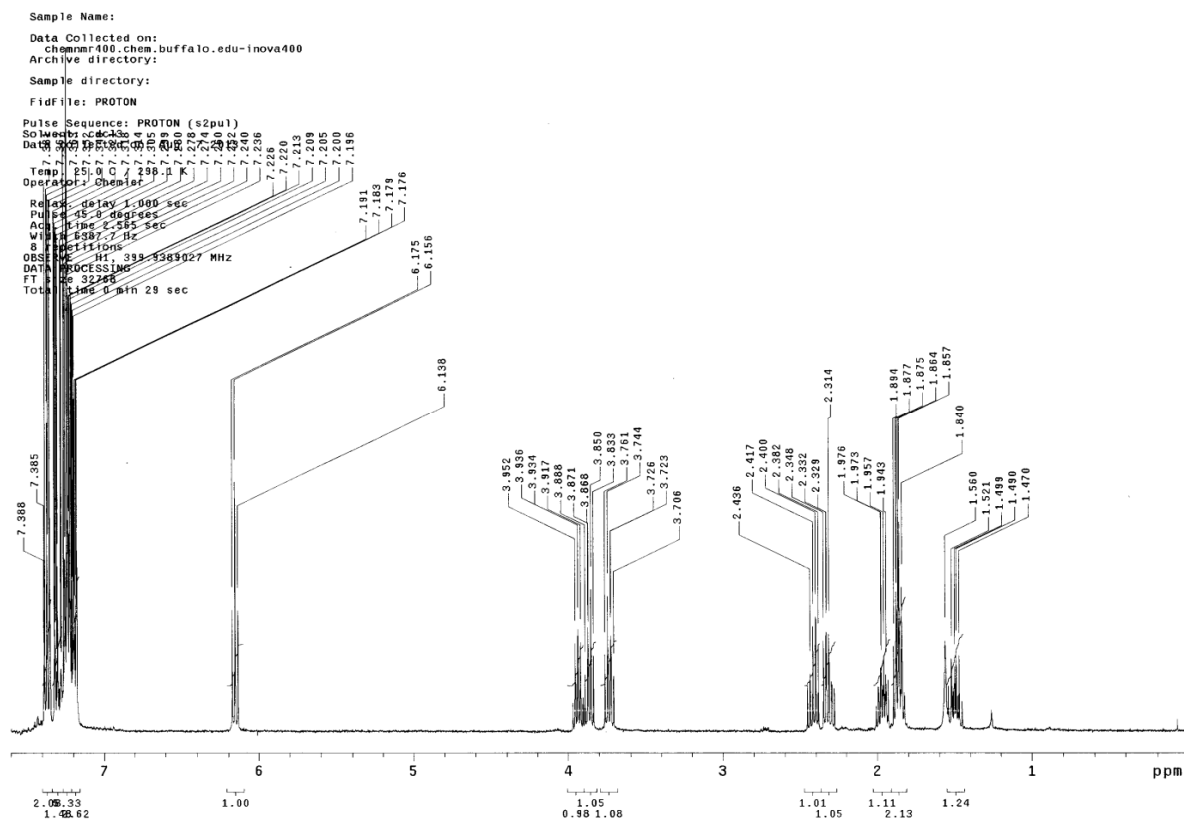

#### STANDARD CARBON PARAMETERS

Sample Name:  
Data Collected on: roesy.chem.buffalo.edu-mercury300  
Archive directory:  
Sample directory:

Fidfile: CARBON

Pulse Sequence: CARBON (s2pul1)  
Solvent: cdc13  
Data collected on: Aug 20 2013

Temp: 25.0 C / 298.1 K  
Operator: Sherry

Relax. delay 8.000 sec  
Pulse 45.0 degrees  
Acq. time 0.868 sec  
Width 18887.3 Hz  
5814 repetitions  
OBSERVE C13, 75.4536375 MHz  
DECOUPLE H1, 300.0754430 MHz  
Power 38 dB  
continuously on  
WALTZ-16 modulated  
DATA PROCESSING  
Line broadening 0.5 Hz  
FT size 32768  
Total time 14 hr, 25

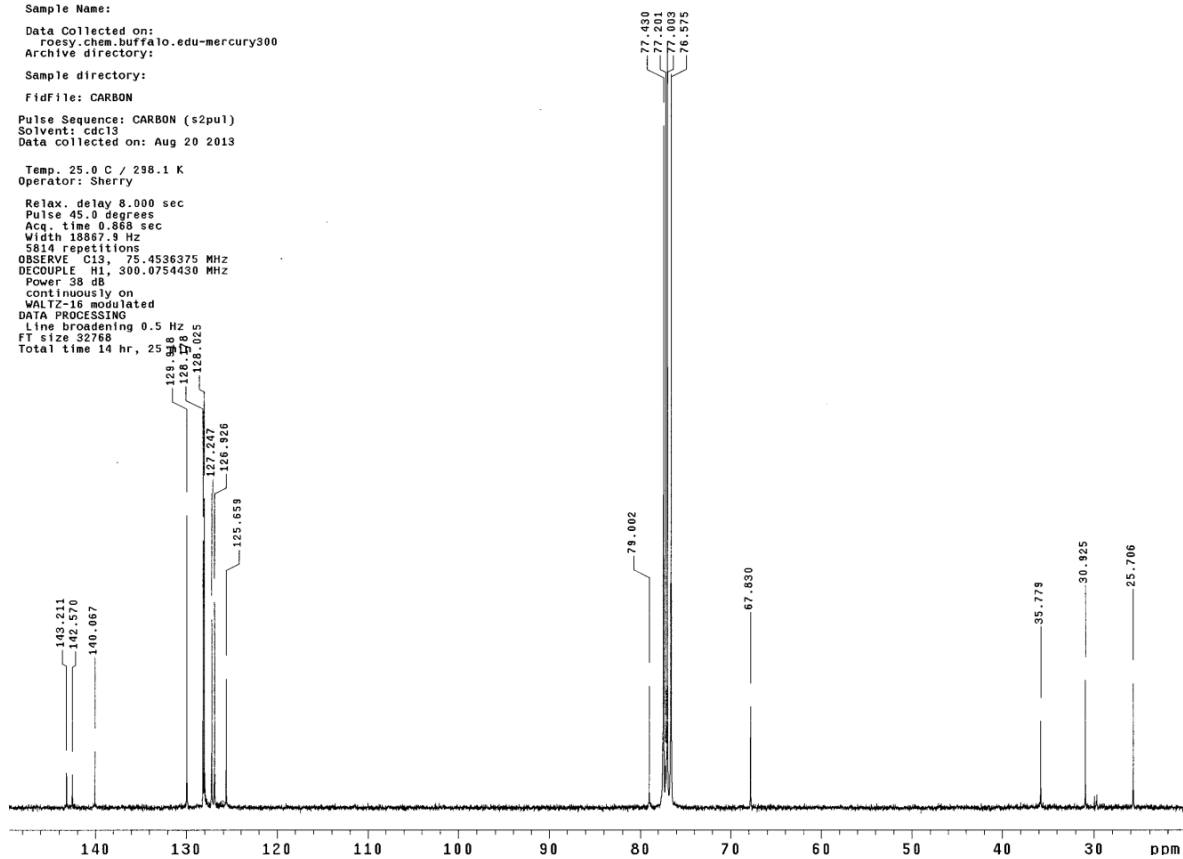

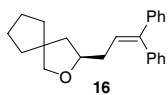

Sample Name:  
Data Collected on:  
chemnmr400.chem.buffalo.edu-inova400  
Archive directory:  
Sample directory:  
FidFile: PROTON

Pulse Sequence: PROTON (s2pu1)  
Solvent: cdc13  
Data collected on: Nov 5 2013

Operator: Chemler  
Relax. delay 1.400 sec  
Pulse 45.0 degrees  
Acq. time 0.886 sec  
Width 6387.9 Hz  
8 repetitions  
OBSERVE H1, 299.9389023 MHz  
DATA PROCESSING  
FT size 32768  
Total time 0 min 29 sec

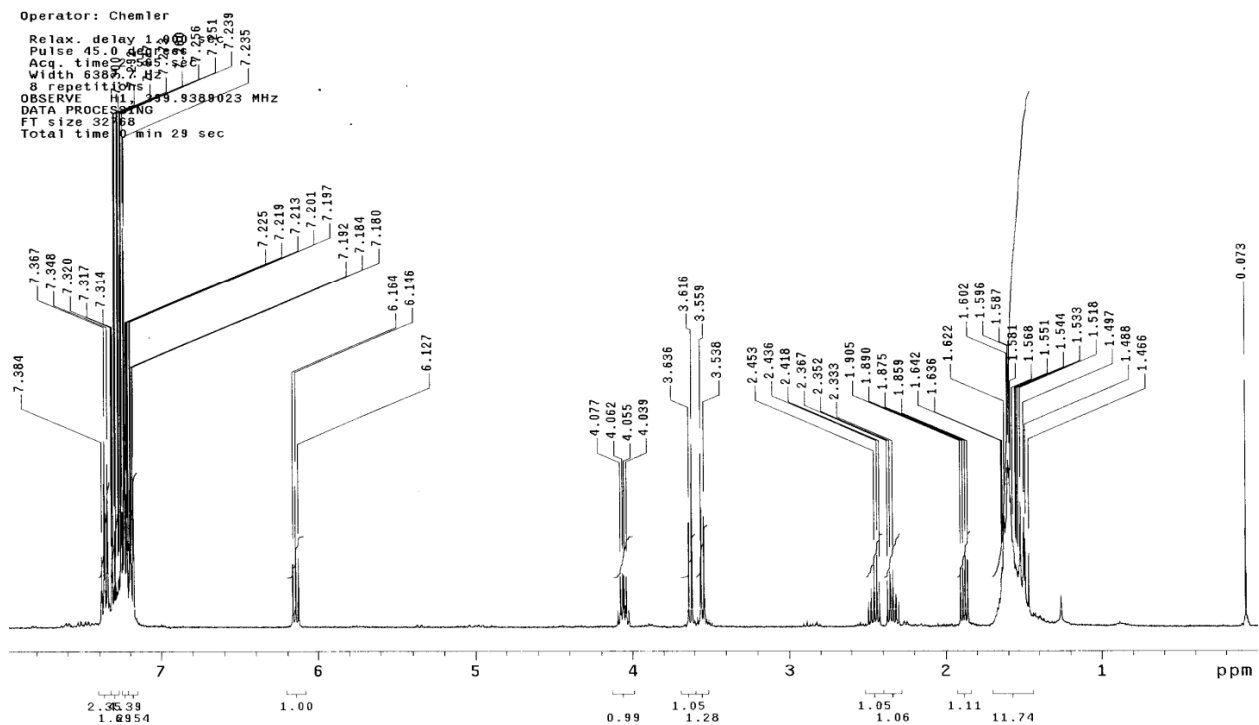

Sample Name:  
Data Collected on:  
roesy.chem.buffalo.edu-mercury300  
Archive directory:  
Sample directory:  
FidFile: CARBON  
Pulse Sequence: CARBON (s2pu1)  
Solvent: cdc13  
Data collected on: May 9 2012

Temp. 23.0 C / 296.1 K  
Operator: Sherry  
Relax. delay 1.000 sec  
Pulse 45.0 degrees  
Acq. time 0.886 sec  
Width 18867.9 Hz  
520 repetitions  
OBSERVE C13, 75.4536400 MHz  
DECOUPLE H1, 300.0754430 MHz  
Power 38 dB  
continuously on  
WALTZ-16 modulated  
DATA PROCESSING  
Line broadening 0.5 Hz  
FT size 32768  
Total time 1 hr, 12 min

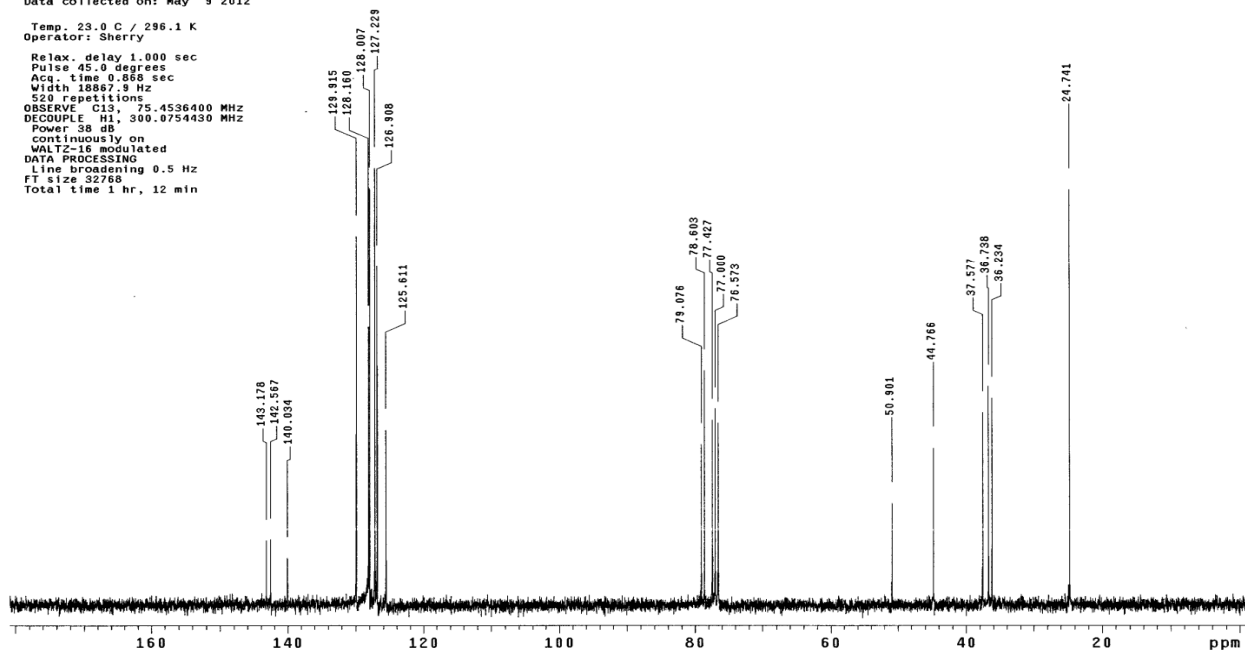

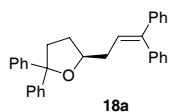

Sample Name:  
 Data Collected on:  
 chemmer400,chem.buffalo.edu-inova400  
 Archive directory:  
 Sample directory:  
 FidFile: PROTON  
 Pulse Sequence: PROTON (s2pu1)  
 Solvent: cdcl3  
 Data collected on: Feb 10 2012  
 Temp. 25.0 C / 298.1 K  
 Operator: Chmaler  
 Relax. delay 2.000 sec  
 Pulse 45.0 degrees  
 Acq. time 0.865 sec  
 Width 6387.2 Hz  
 8 repetitions  
 OBSERVE R1 399.9389215 MHz  
 DATA PROCESSING  
 FT size 32768  
 Total time 0 min 29 sec

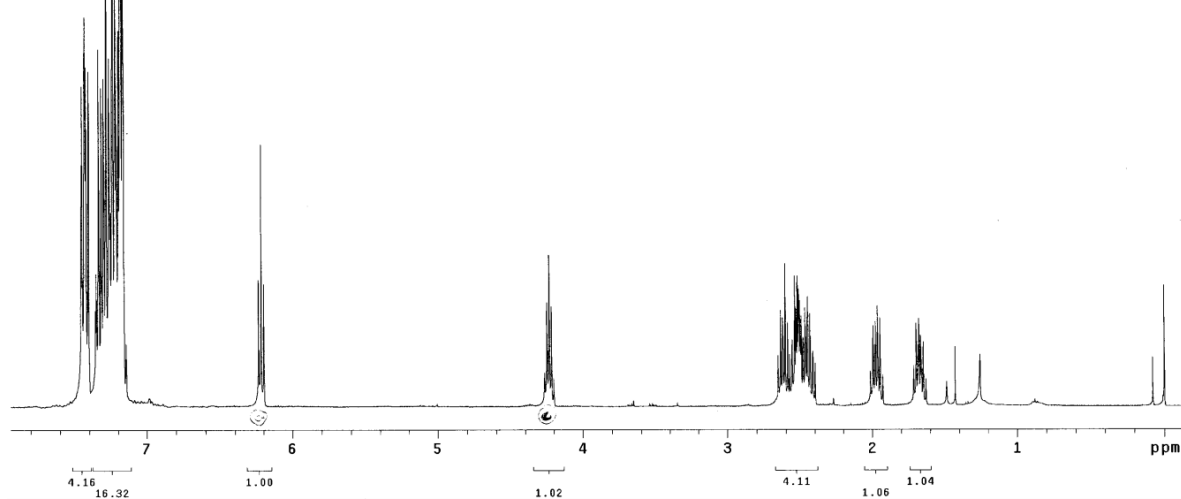

#### STANDARD CARBON PARAMETERS

Sample Name:  
 Data Collected on:  
 roesy,chem.buffalo.edu-mercury300  
 Archive directory:  
 Sample directory:  
 FidFile: CARBON  
 Pulse Sequence: CARBON (s2pu1)  
 Solvent: cdcl3  
 Data collected on: Feb 9 2012  
 Temp. 22.4 C / 295.6 K  
 Operator: Sherry  
 Relax. delay 1.000 sec  
 Pulse 45.0 degrees  
 Acq. time 0.668 sec  
 Width 18867.9 Hz  
 1776 repetitions  
 OBSERVE C13, 76.4536423 MHz  
 DECOUPLE H1, 300.0754430 MHz  
 Power 38 dB  
 continuously on  
 WALTZ-16 modulated  
 DATA PROCESSING  
 Line broadening 0.5 Hz  
 FT size 32768  
 Total time 2 hr, 28 min

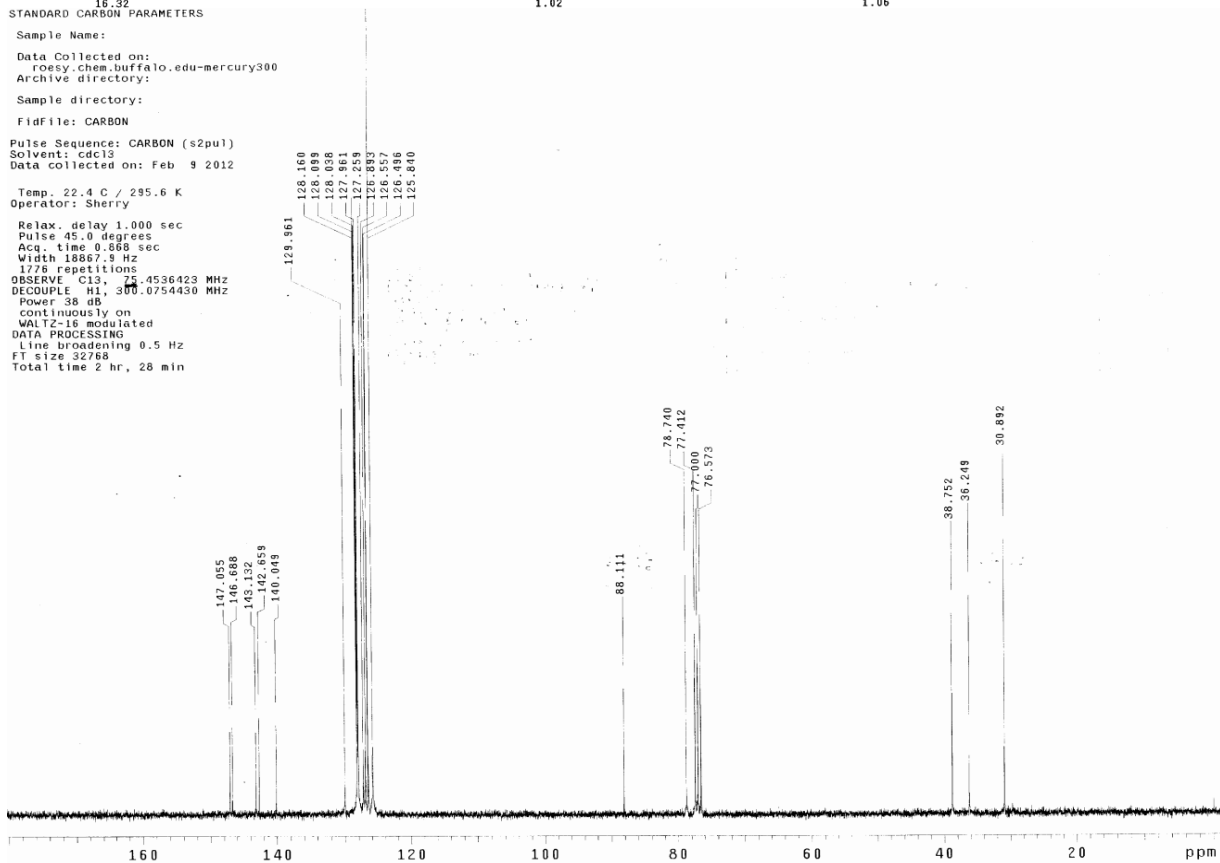

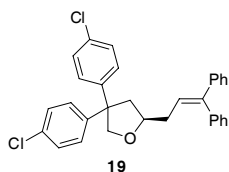

# STANDARD PROTON PARAMETERS

Sample Name:

Data Collected on:  
roesy.chem.buffalo.edu-mercury300

Archive directory:

Sample directory:

FidFile: PROTON

Pulse Sequence: PROTON (s2pu1)

Solvent: cdc13

Data collected on: Sep 24 2013

Temp. 25.0 C / 298.1 K  
Operator: Sherry

Relax. delay 1.000 sec

Pulse 45.0 degrees

Acq. time 1.706 sec

Width 4803.1 Hz

8 repetitions

OBSERVE H1, 300.0738816 MHz

DATA PROCESSING

FT size 16384

Total time 0 min 23 sec

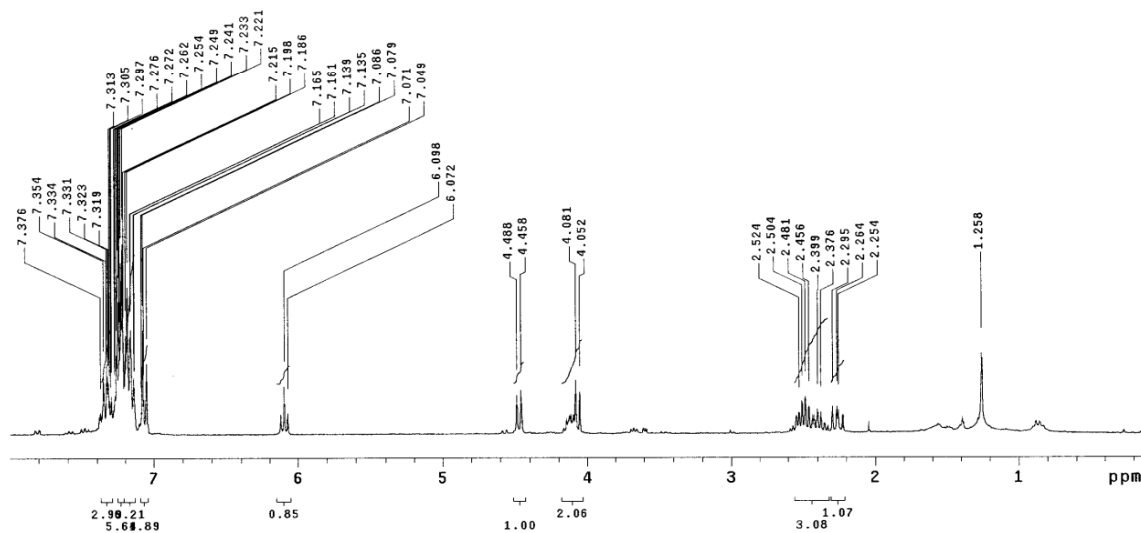

Sample Name:

Data Collected on:  
roesy.chem.buffalo.edu-mercury300

Archive directory:

Sample directory:

FidFile: CARBON

Pulse Sequence: CARBON (s2pu1)

Solvent: cdc13

Data collected on: Sep 23 2013

Temp. 23.4 C / 296.6 K

Operator: Sherry

Relax. delay 8.000 sec

Pulse 45.0 degrees

Acq. time 0.888 sec

Width 15887.9 Hz

5852 repetitions

OBSERVE C13, 75.4536375 MHz

DECOUPLE H1, 300.0754430 MHz

Power 38 dB

Continuously on

WALTZ-16 modulated

DATA PROCESSING

Line broadening 0.5 Hz

FT size 32768

Total time 15 hr, 14 min

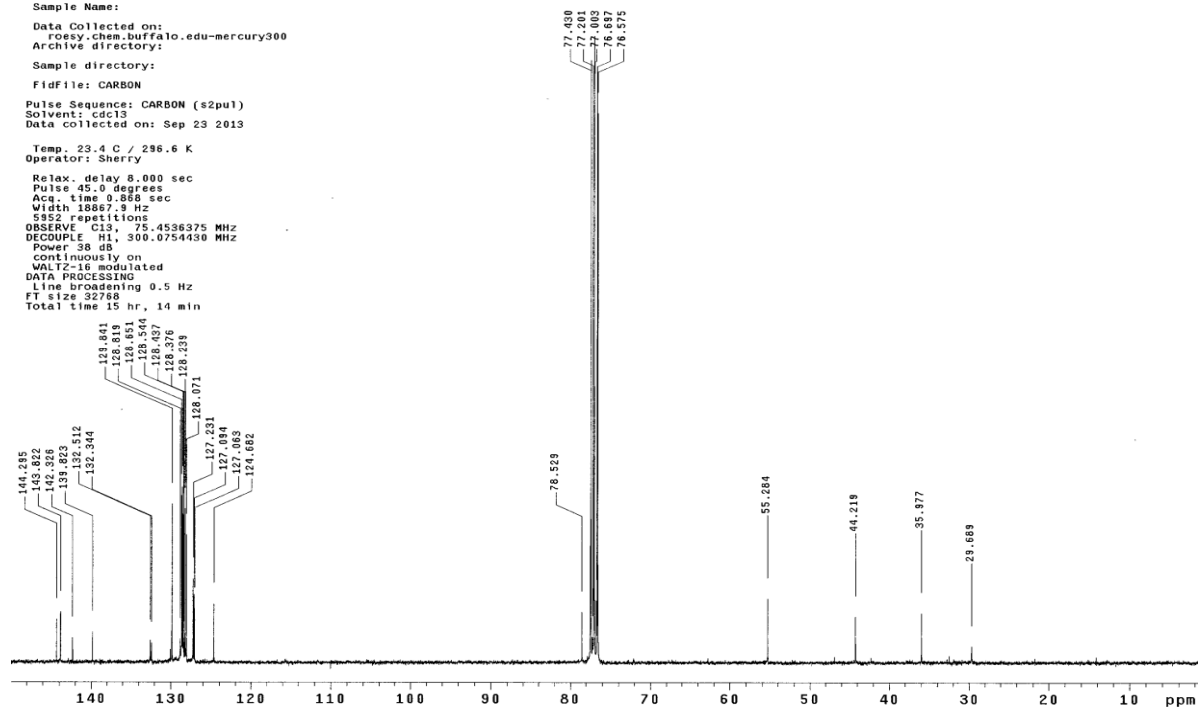

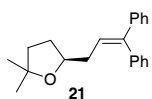

tw1-3-302prepped

Sample Name: 21  
 Data Collected On: Nov 15 2013  
 nmr300.chem.buffalo.edu-mercury300  
 Archive directory:  
 Sample directory:  
 FidFile: PROTON  
 Pulse Sequence: PROTON (s2pu1)  
 Solvent: cdc13  
 Data collected on: Nov 15 2013  
 Temp. 25.0 C / 298.1 K  
 Operator: Chemier  
 Relax. delay 1.000 sec  
 Pulse 45.0 degrees  
 Acq. time 565 sec  
 Width 6387.9 Hz  
 8 repetitions  
 OBSERVE C13, 399.9389015 MHz  
 DATA PROCESSING  
 FT size 32768  
 Total time 1 min 29 sec

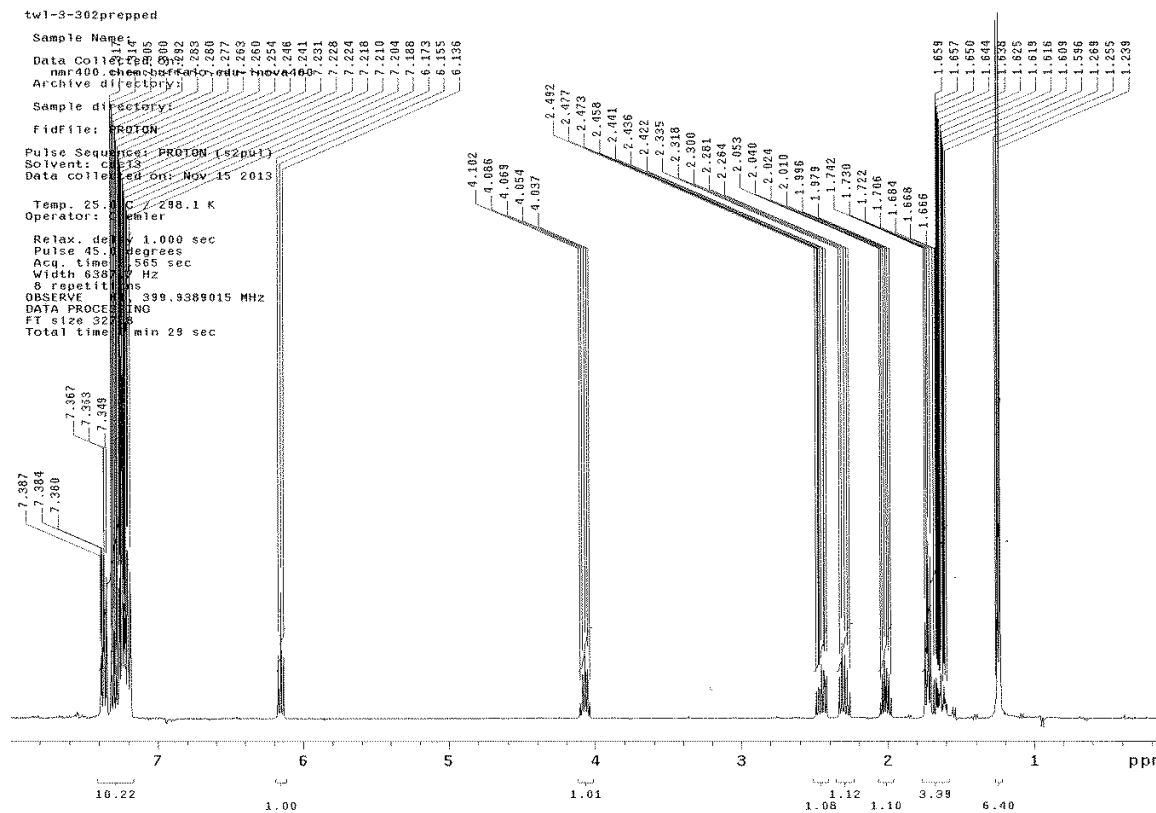

tw1-3-302carbon

Sample Name: 21  
 Data Collected On: Nov 15 2013  
 nmr300.chem.buffalo.edu-mercury300  
 Archive directory:  
 Sample directory:  
 FidFile: CARBON  
 Pulse Sequence: CARBON (s2pu1)  
 Solvent: cdc13  
 Data collected on: Nov 15 2013  
 Temp. 23.7 C / 296.9 K  
 Operator: Chemier  
 Relax. delay 1.000 sec  
 Pulse 45.0 degrees  
 Acq. time 0.868 sec  
 Width 18867.9 Hz  
 1440 repetitions  
 OBSERVE C13, 75.4536388 MHz  
 DECOUPLE H1, 300.0754430 MHz  
 Power 38 dB  
 continuously on  
 WALTZ-16 modulated  
 DATA PROCESSING  
 Line broadening 0.5 Hz  
 FT size 32768  
 Total time 3 hr

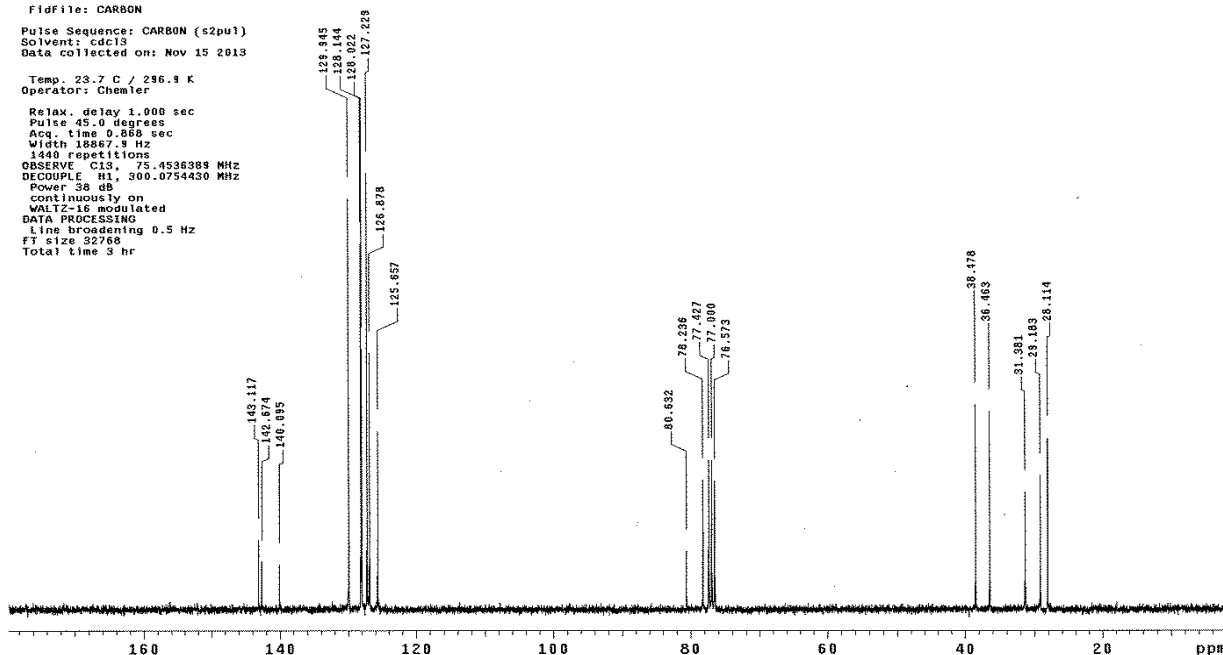

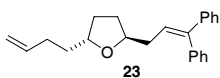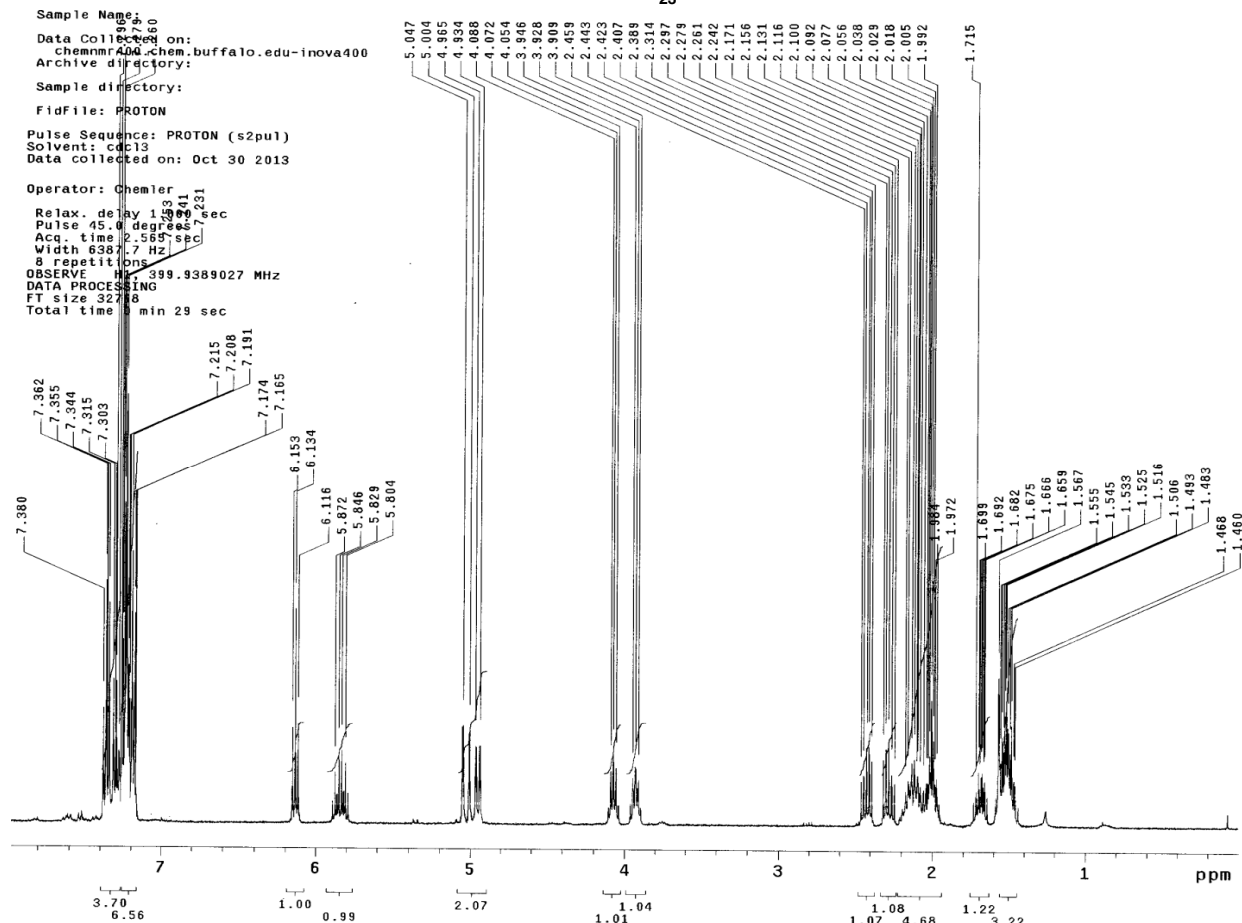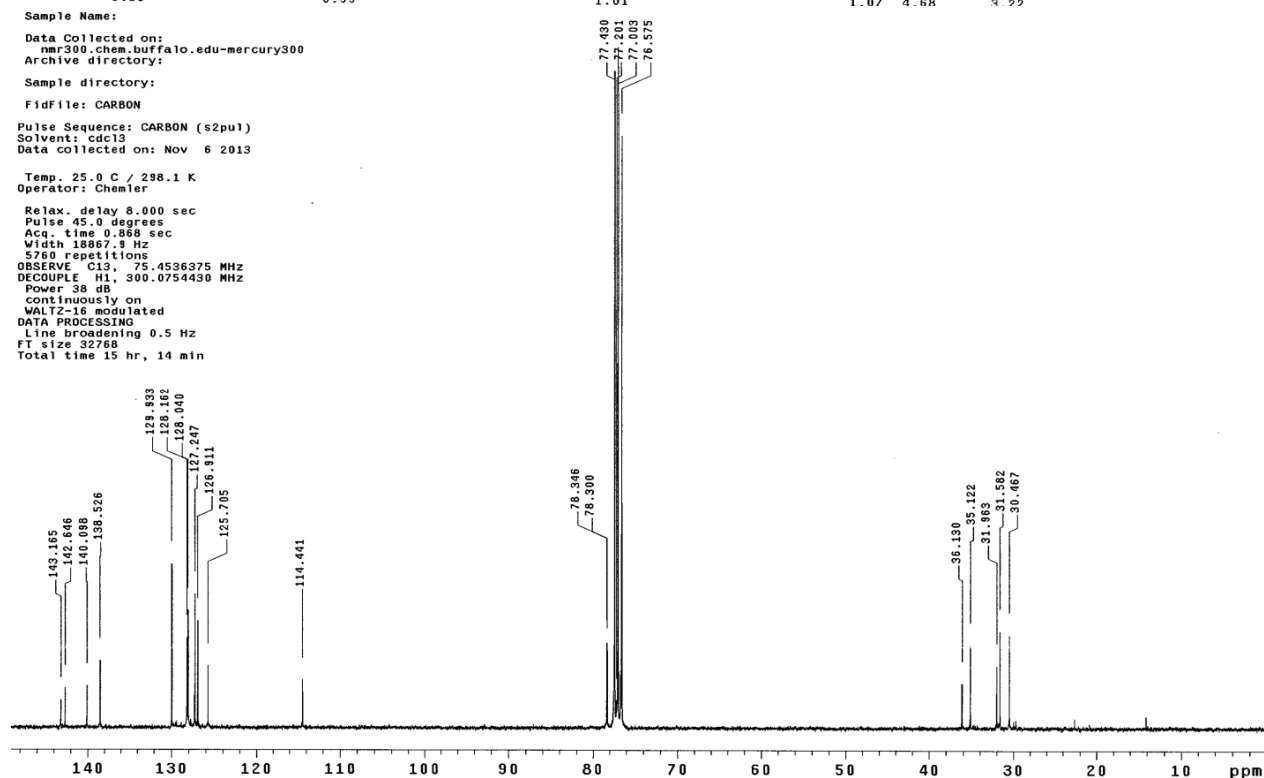

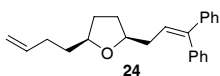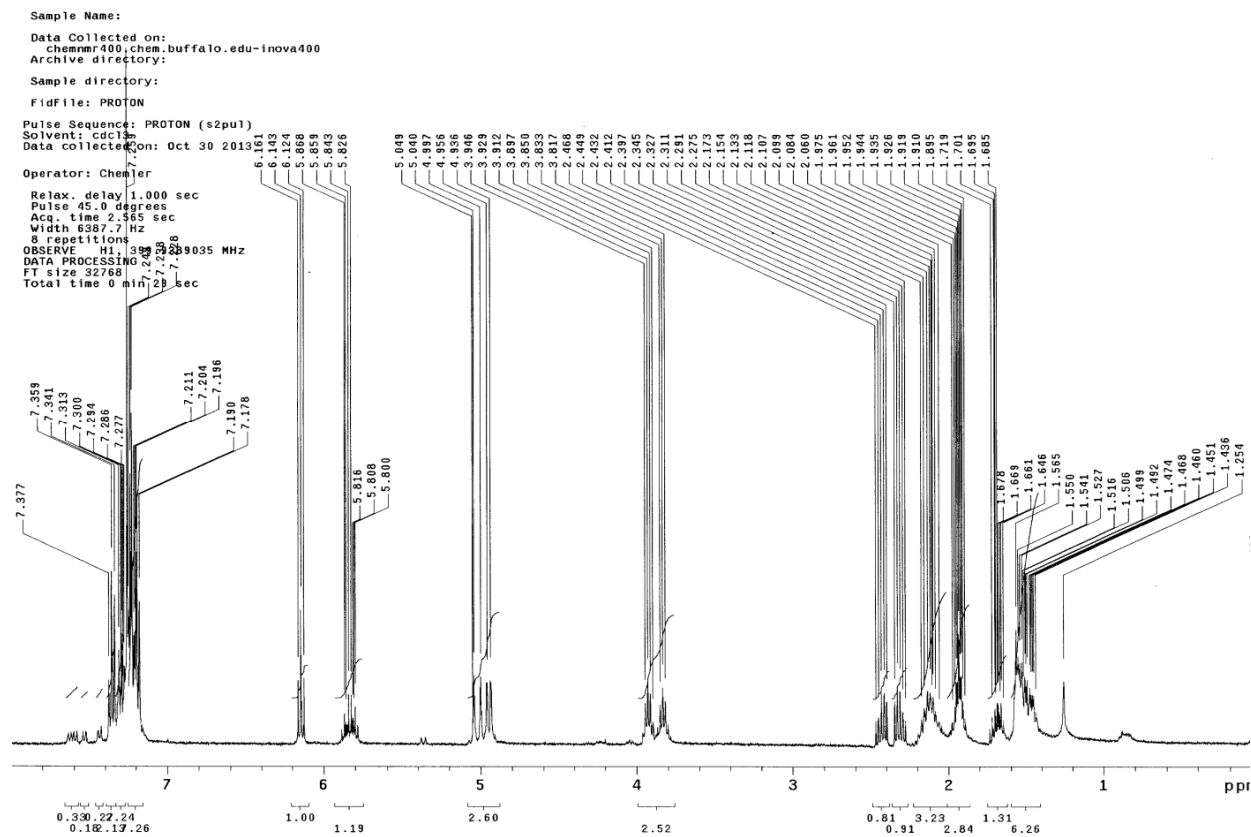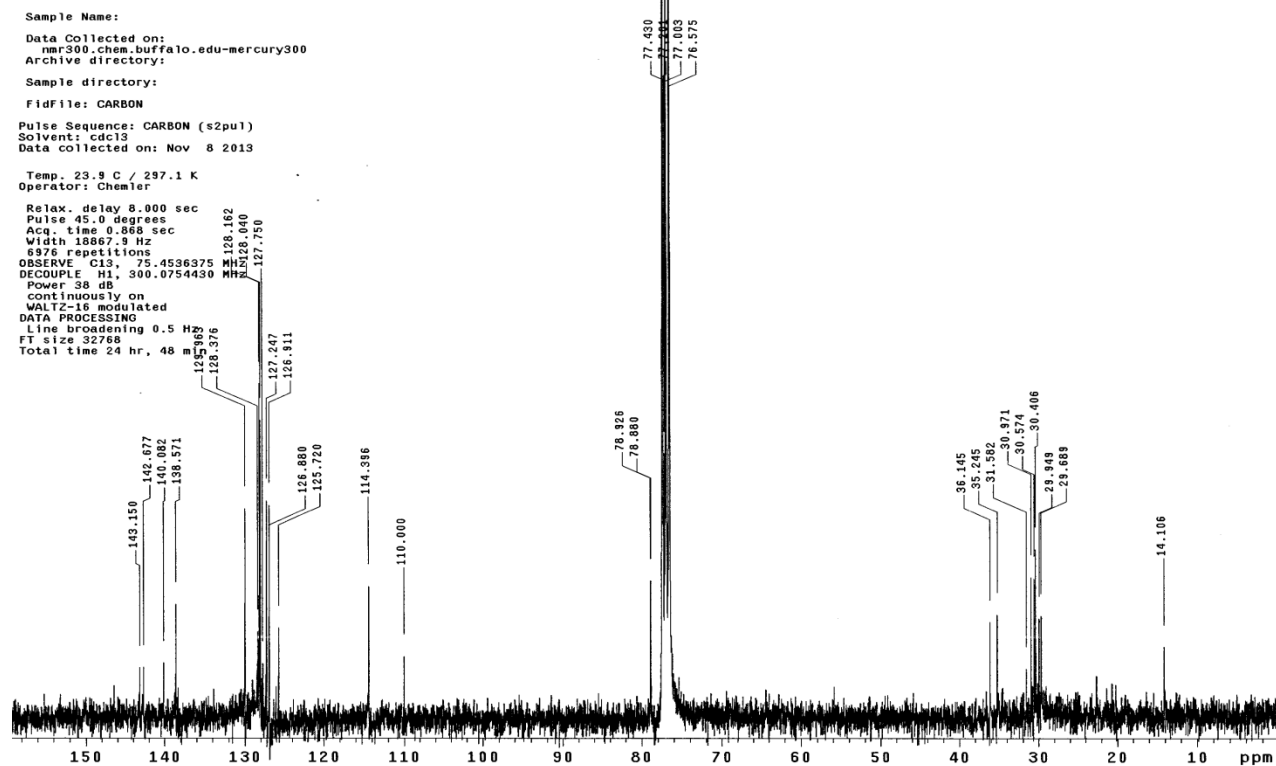

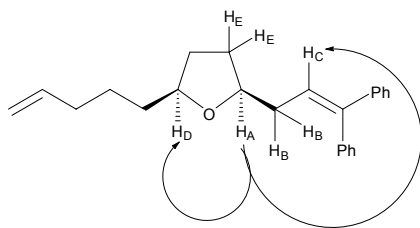

Selective band center: 3.86 (ppm); width: 32.5 (Hz)

Sample Name:

Data Collected on:  
nmr500c.chem.buffalo.edu-inova500

Archive directory:

Sample directory:

FidFile: NOESY1D

Pulse Sequence: NOESY1D

Solvent: cdcl3

Data collected on: Nov 20 2013

Temp. 25.0 C / 298.1 K

Operator: Chemler

Relax. delay 1.000 sec

Pulse 90.0 degrees

Acq. time 2.048 sec

Width 8000.0 Hz

13600 repetitions

OBSERVE H1, 499.8984429 MHz

DATA PROCESSING

FT size 32768

Total time 21 hr, 24 min

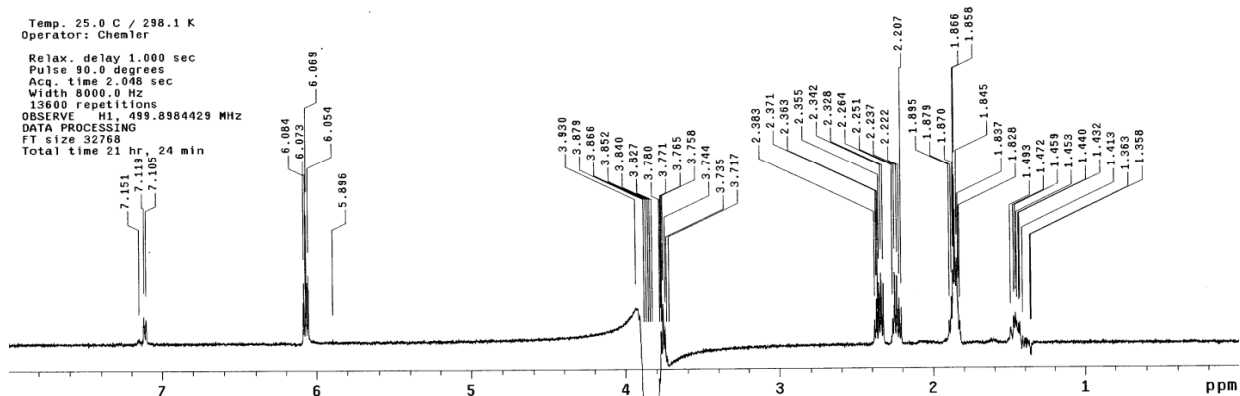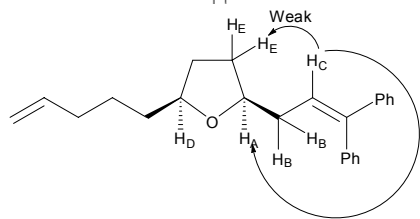

Selective band center: 6.15 (ppm); width: 16.5 (Hz)

Sample Name:

Data Collected on:  
nmr500c.chem.buffalo.edu-inova500

Archive directory:

Sample directory:

FidFile: NOESY1D

Pulse Sequence: NOESY1D

Solvent: cdcl3

Data collected on: Nov 22 2013

Temp. 25.0 C / 298.1 K

Operator: Chemler

Relax. delay 1.000 sec

Pulse 90.0 degrees

Acq. time 2.048 sec

Width 8000.0 Hz

14784 repetitions

OBSERVE H1, 499.8984040 MHz

DATA PROCESSING

FT size 32768

Total time 38 hr, 54 min

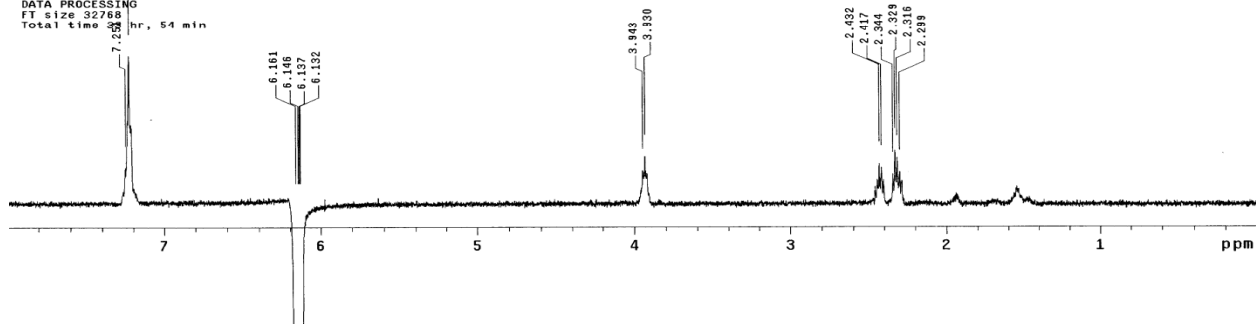

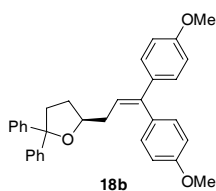

Sample Name:  
 Data Collected on:  
 chemmr400.chem.buffalo.edu-inova400  
 Archive directory:  
 Sample directory:  
 Fidfile: PROTON  
 Pulse Sequence: PROTON (s2pul)  
 Solvent: cdc13  
 Data collected on: Dec 14 2012  
 Operator: Chemler  
 Relax. delay 1.000 sec  
 Pulse 45.0 degrees  
 Acq. time 2.585 sec  
 Width 6387.7325  
 8 repetitions  
 OBSERVE H1, 399.9389023 MHz  
 DATA PROCESSING  
 FT size 32768  
 Total time 0 min 29 sec

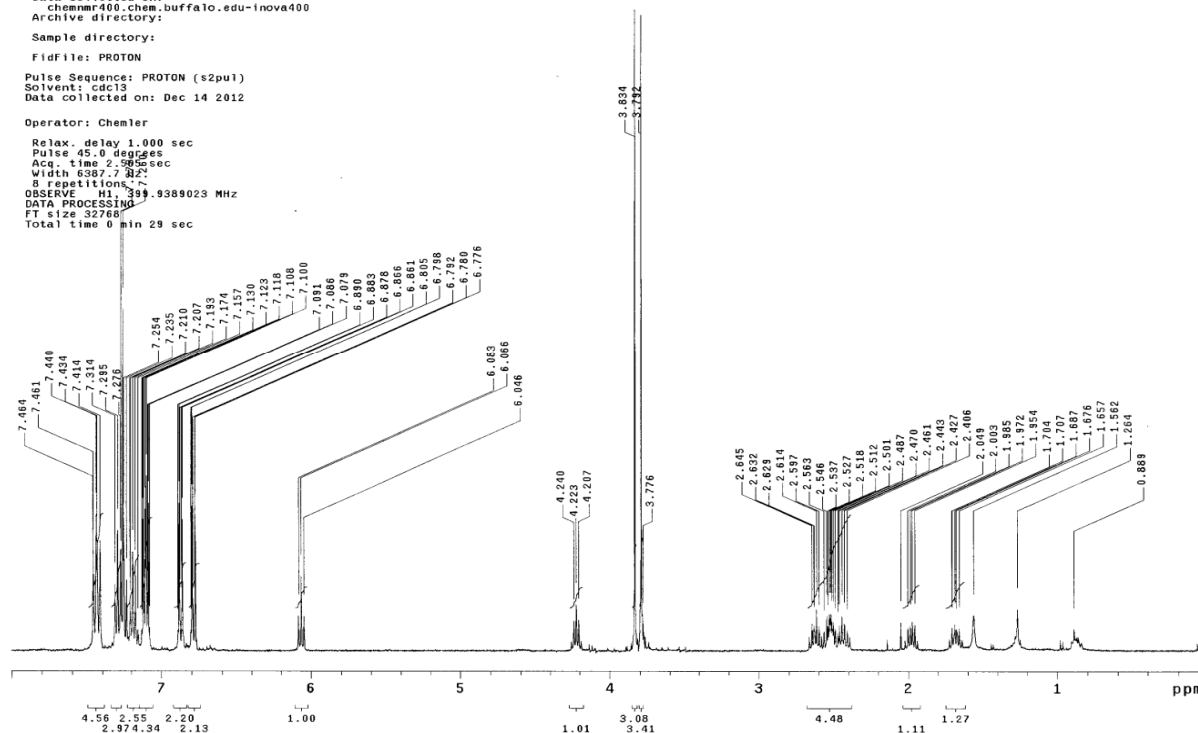

Sample Name:  
 Data Collected on:  
 fmsy.chem.buffalo.edu-mercury300  
 Archive directory:  
 Sample directory:  
 Fidfile: CARBON  
 Pulse Sequence: CARBON (s2pul)  
 Solvent: cdc13  
 Data collected on: Oct 9 2013  
 Temp. 25.0 C / 298.1 K  
 Operator: Sherry  
 Relax. delay 8.000 sec  
 Pulse 45.0 degrees  
 Acq. time 0.868 sec  
 Width 18867.9 Hz  
 6080 repetitions  
 OBSERVE C13, 75.4536389 MHz  
 DECOUPLE H1, 300.0754430 MHz  
 Power 38 dB  
 continuously on  
 WALTZ-16 modulated  
 DATA PROCESSING  
 Line broadening 0.5 Hz  
 FT size 32768  
 Total time 15 hr, 14 min

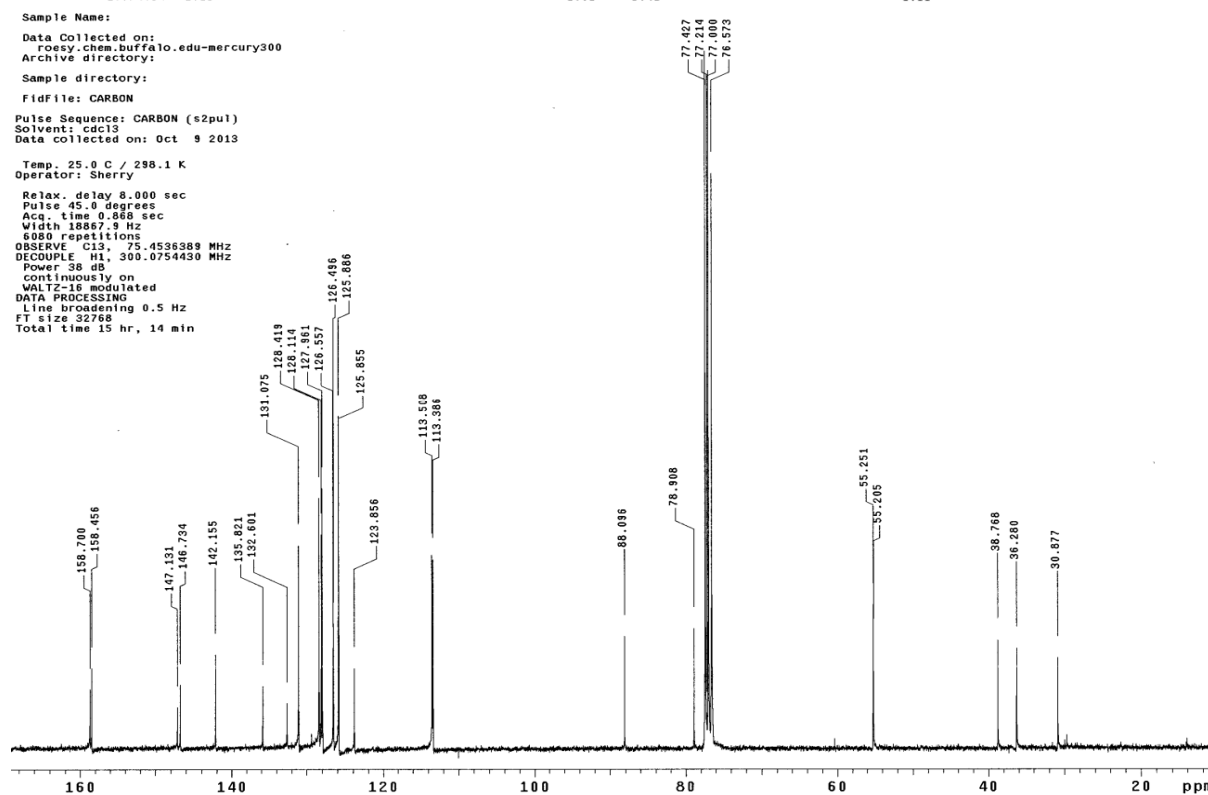

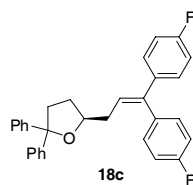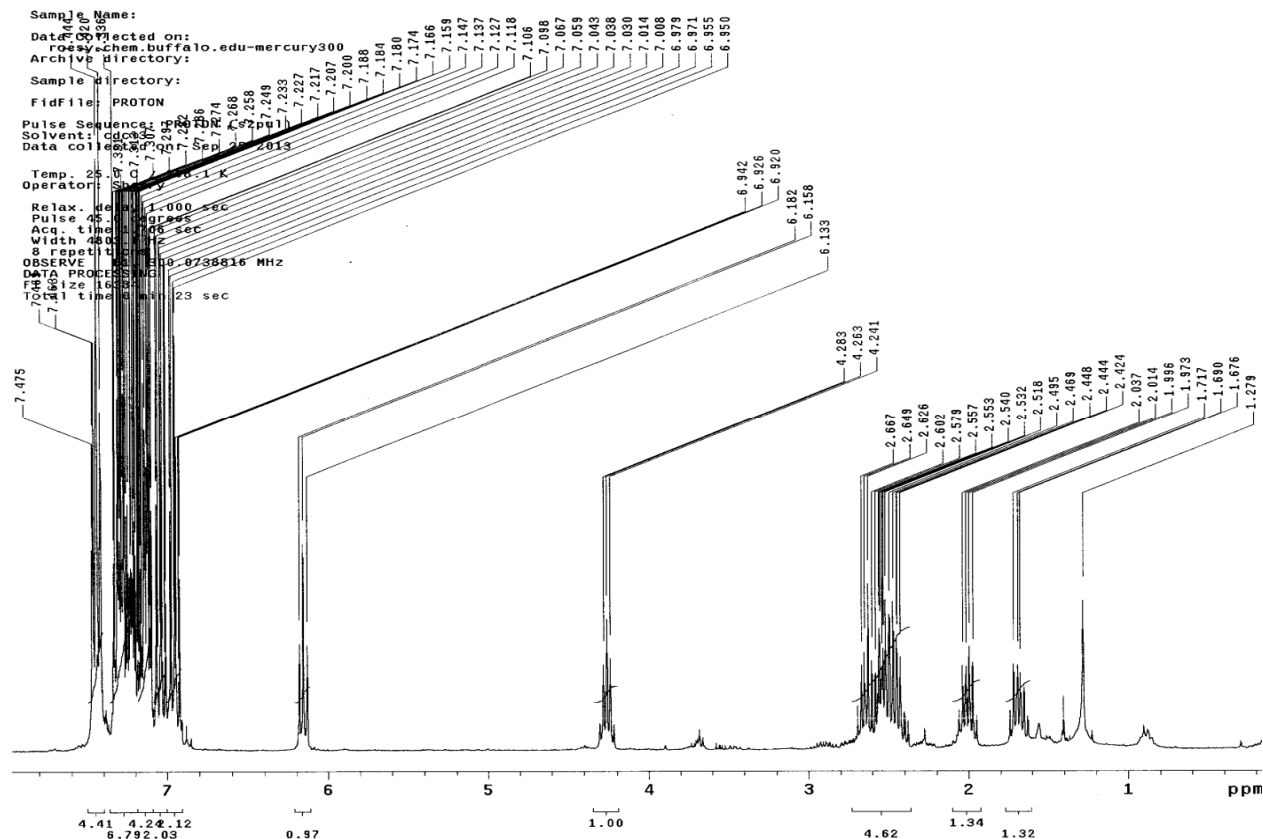

# STANDARD CARBON PARAMETERS

Sample Name: 18c  
 Data Collected on: roesy.chem.buffalo.edu-mercury300  
 Archive directory:  
 Sample directory:  
 FidFile: CARBON  
 Pulse Sequence: CARBON (s2pu1)  
 Solvent: cdcl3  
 Data collected on: Sep 24 2013  
 Temp: 25.0 C / 298.1 K  
 Operator: Sherry  
 Relax. delay: 8.000 sec  
 Pulse: 45.0 degrees  
 Acq. time: 0.800 sec  
 Width: 18887.9 Hz  
 582 repetitions  
 OBSERVE: C13, 75.4536400 MHz  
 DECOUPLE: H1, 300.0754430 MHz  
 Power: 38 dB  
 Continuously on  
 VOLTAGE: 16 modulated  
 DATA PROCESSING:  
 Line broadening: 0.5 Hz  
 FT size: 32768  
 Total time: 15 hr, 14 min

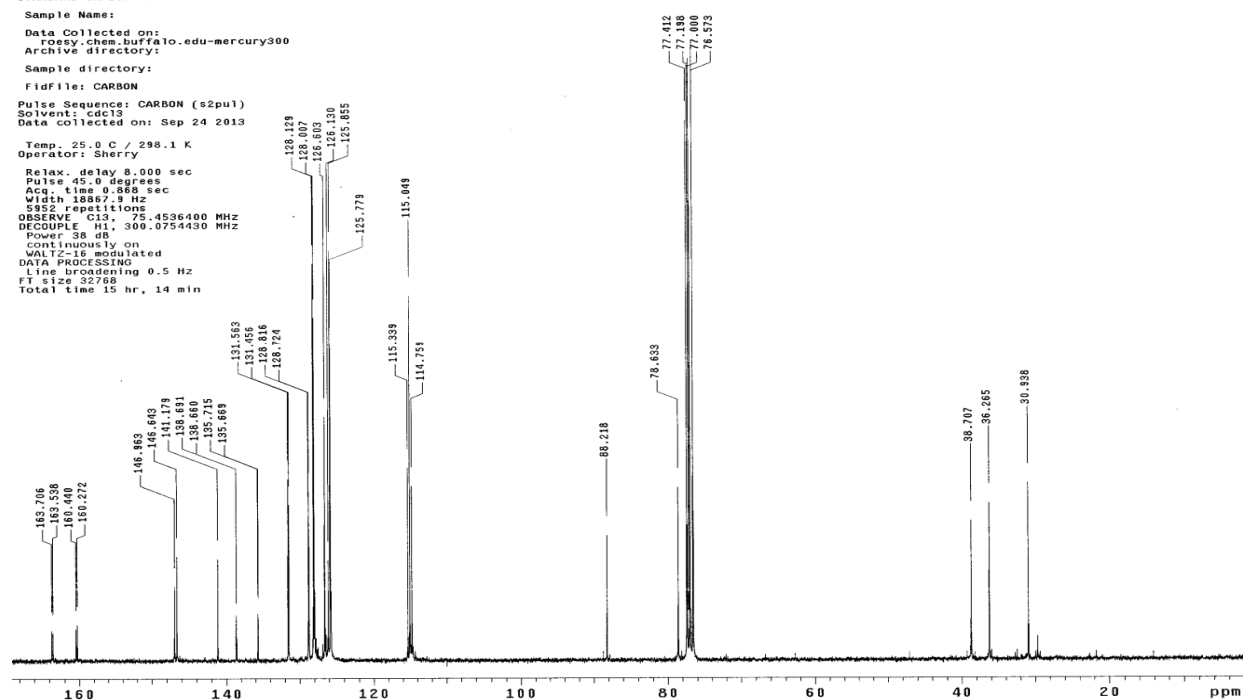

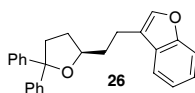

Sample Name:  
Data Collected on:  
chemmr400.chem.buffalo.edu-inova400  
Archive directory:  
Sample directory:  
FidFile: PROTON

Pulse Sequence: PROTON (s2pul)  
Solvent: cdcl3  
Data collected on: Sep 30 2013  
Temp: 25.0 C / 298.1 K  
Operator: Chemier  
Relax. delay: 1.000 sec  
Pulse: 45.0 degrees  
Acq. time: 2.565 sec  
Width: 6387.4 Hz  
8 repetitions  
OBSERVE: H1, 399.9389011 MHz  
DATA PROCESSING  
FT size: 32768  
Total time: 0 min 29 sec

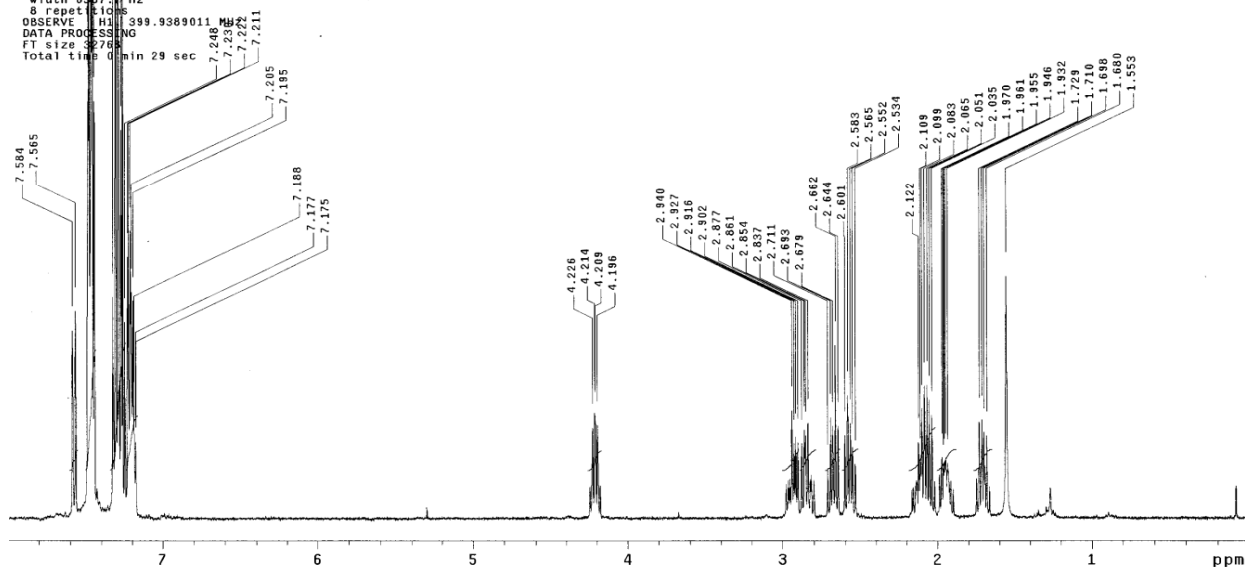

#### STANDARD CARBON PARAMETERS

Sample Name:  
Data Collected on:  
roesy.chem.buffalo.edu-mercury300  
Archive directory:  
Sample directory:  
FidFile: CARBON  
Pulse Sequence: CARBON (s2pul)  
Solvent: cdcl3  
Data collected on: Sep 30 2013

Temp: 23.4 C / 296.6 K  
Operator: Sherry  
Relax. delay: 8.000 sec  
Pulse: 45.0 degrees  
Acq. time: 0.868 sec  
Width: 18867.9 Hz  
5952 repetitions  
OBSERVE: C13, 75.4536389 MHz  
DECOUPLE: H1, 300.0754430 MHz  
Power: 38 dB  
continuously on  
WALTZ-16 modulated  
DATA PROCESSING  
Line broadening: 0.5 Hz  
FT size: 32768  
Total time: 15 hr, 14 min

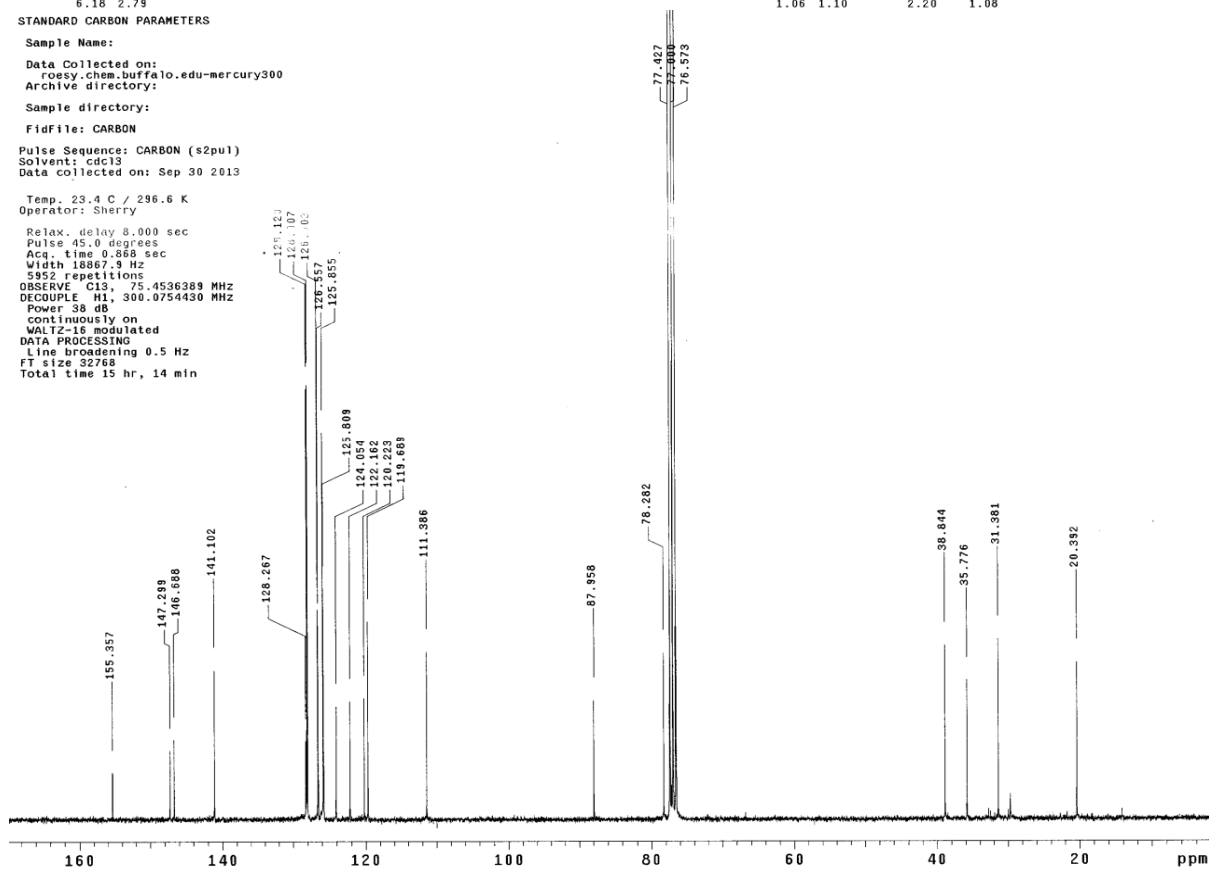

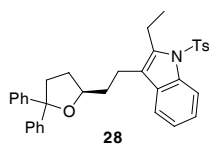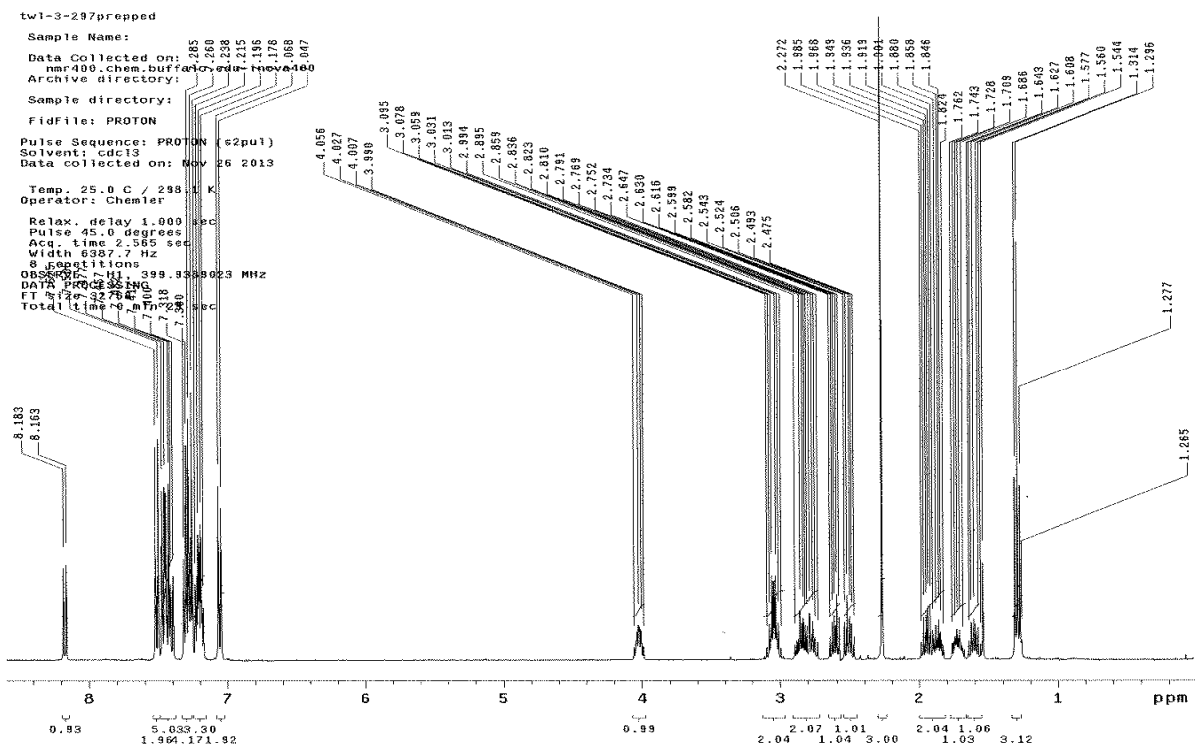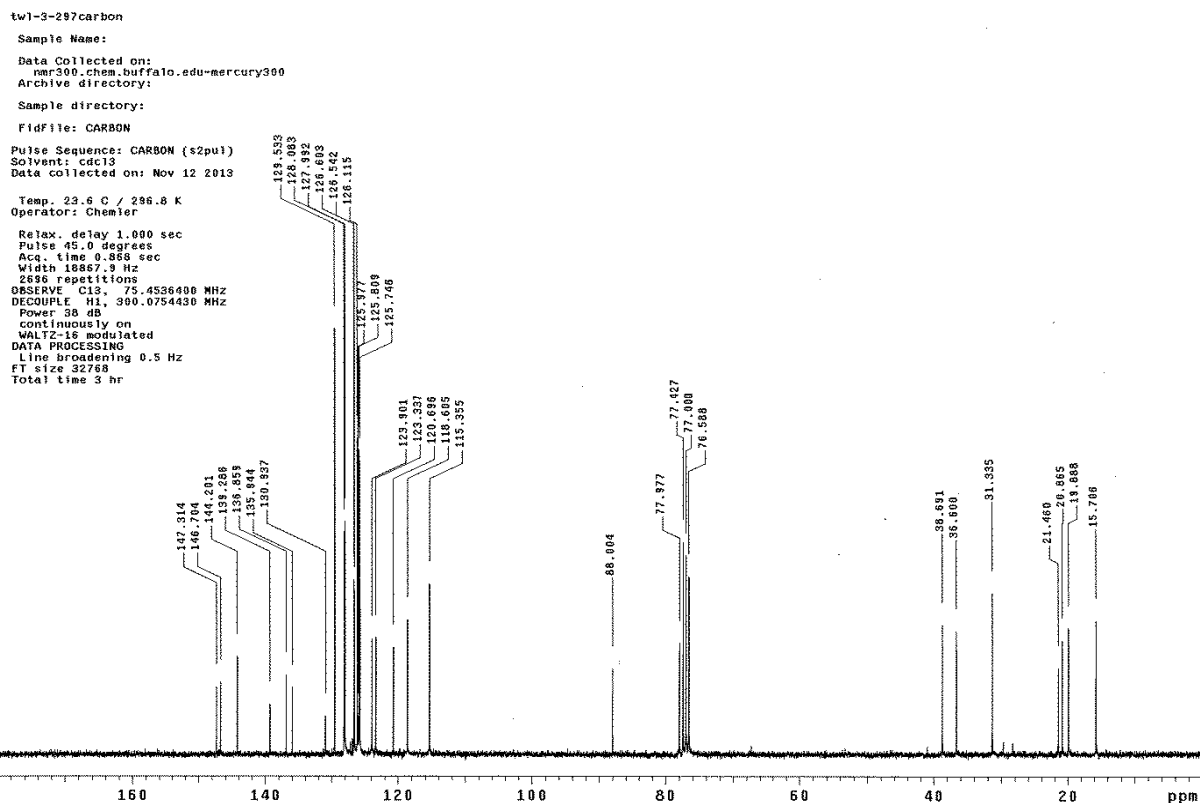

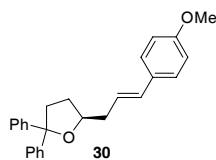

tw1-4-072prepped

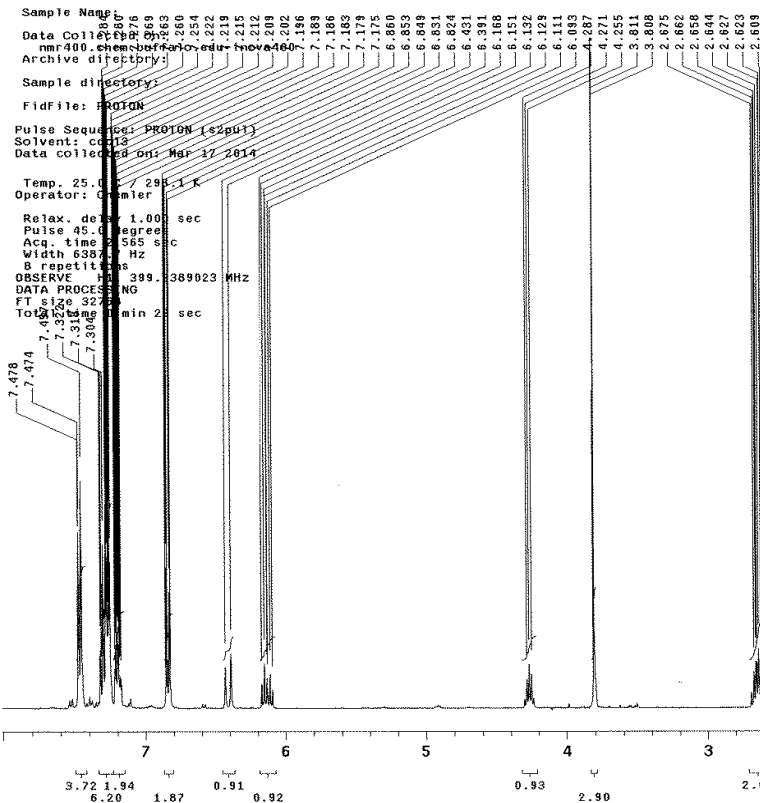

tw1-4-072carbon

Sample Name: 30  
 Data Collected On: mmr300.chem.buffalo.edu-mercury300  
 Archive directory: /usr/local/chem/buffalo.edu-mercury300  
 Sample directory: /usr/local/chem/buffalo.edu-mercury300  
 FidFile: CARBON

Pulse Sequence: CARBON (s2pu1)  
 Solvent: cdcl3  
 Data collected on: Mar 18 2014

Temp. 23.7 C / 296.9 K  
 Operator: Chemier

Relax. delay 1.000 sec  
 Pulse 45.0 degrees  
 Acq. time 0.369 sec  
 Width 18067.9 Hz  
 23336 repetitions  
 OBSERVE C13, 75.4536377 MHz  
 DECOUPLE H1, 300.0754430 MHz  
 Power 36 dB  
 continuously on  
 WALTZ-16 modulated  
 DATA PROCESSING  
 Line broadening 0.5 Hz  
 FT size 32768  
 Total time 16 hr, 34 min

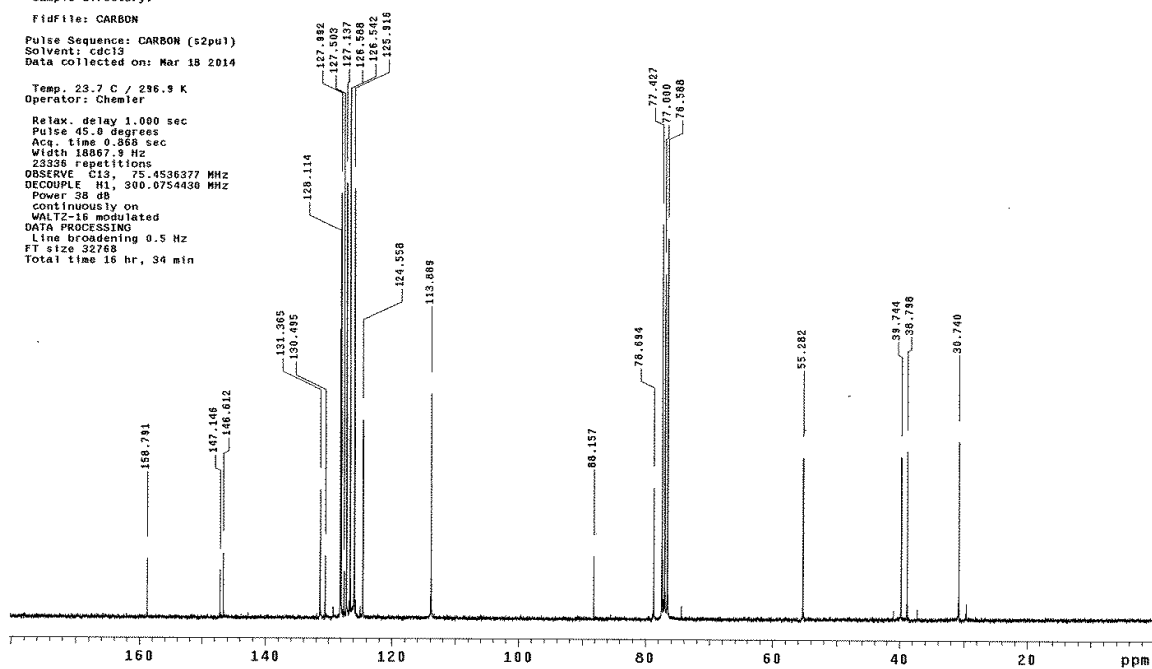

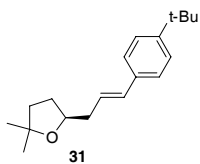

tw1-4-074prepped

Sample Name:

Data Collected on:  
nmr400.chem.buffalo.edu-inova400

Archive directory:

Sample directory:

FidFile: PROTON

Pulse Sequence: PROTON (s2pul)  
Solvent: cdc13

Data collected on: Mar 18 2014

Temp. 25.0 C / 298.1 K  
Operator: Chemler

Relax. delay 1.000 sec  
Pulse 45.0 degrees  
Acq. time 2.565 sec  
Width 6387.7 Hz

8 repetitions

OBSERVE H1, 399.9389027 MHz

DATA PROCESSING

FT size 32768

Total time 0 min 29 sec

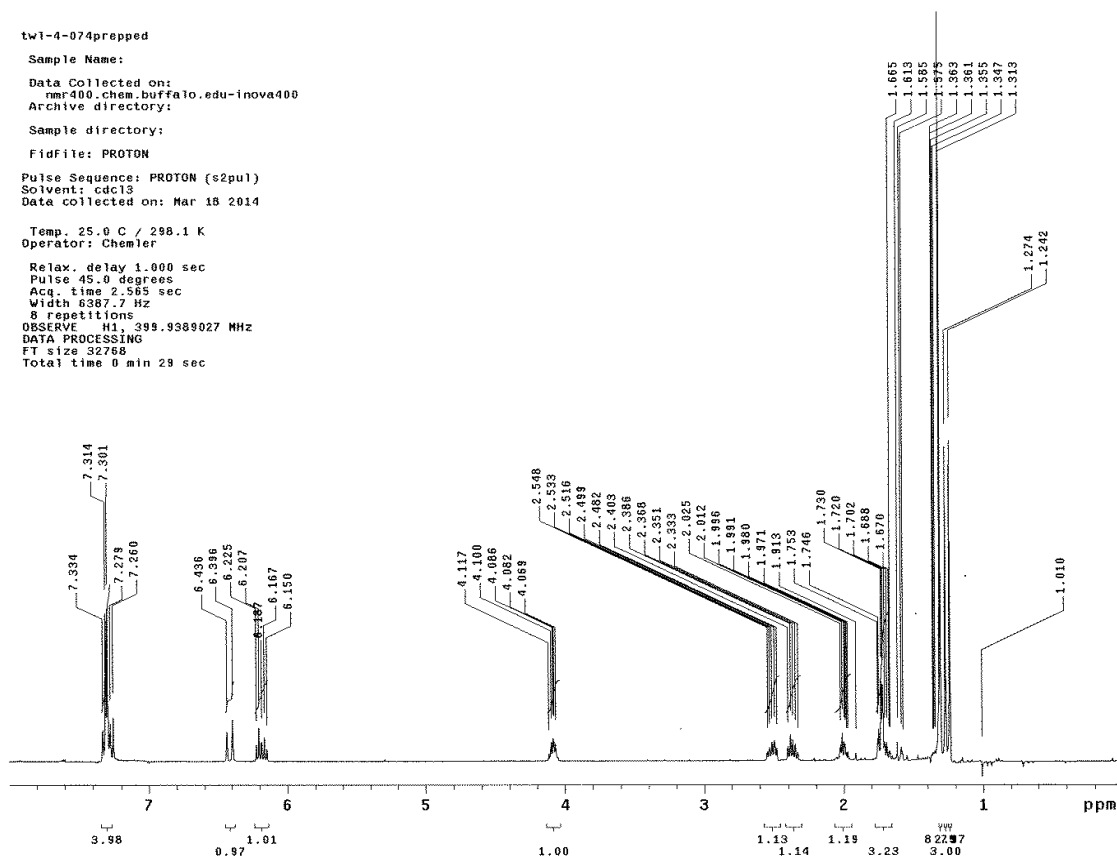

tw1-4-074carbon

Sample Name:

Data Collected on:  
nmr300.chem.buffalo.edu-mercury300

Archive directory:

Sample directory:

FidFile: CARBON

Pulse Sequence: CARBON (s2pul)  
Solvent: cdc13

Data collected on: Mar 19 2014

Temp. 23.5 C / 296.6 K  
Operator: Chemler

Relax. delay 1.000 sec  
Pulse 45.0 degrees  
Acq. time 0.868 sec  
Width 16887.9 Hz

1768 repetitions

OBSERVE C13, 75.4536281 MHz

DECOUPLE H1, 300.0754439 MHz

Power 38 dB

continuously on

WALTZ-16 modulated

DATA PROCESSING

Line broadening 0.5 Hz

FT size 32768

Total time 5 hr

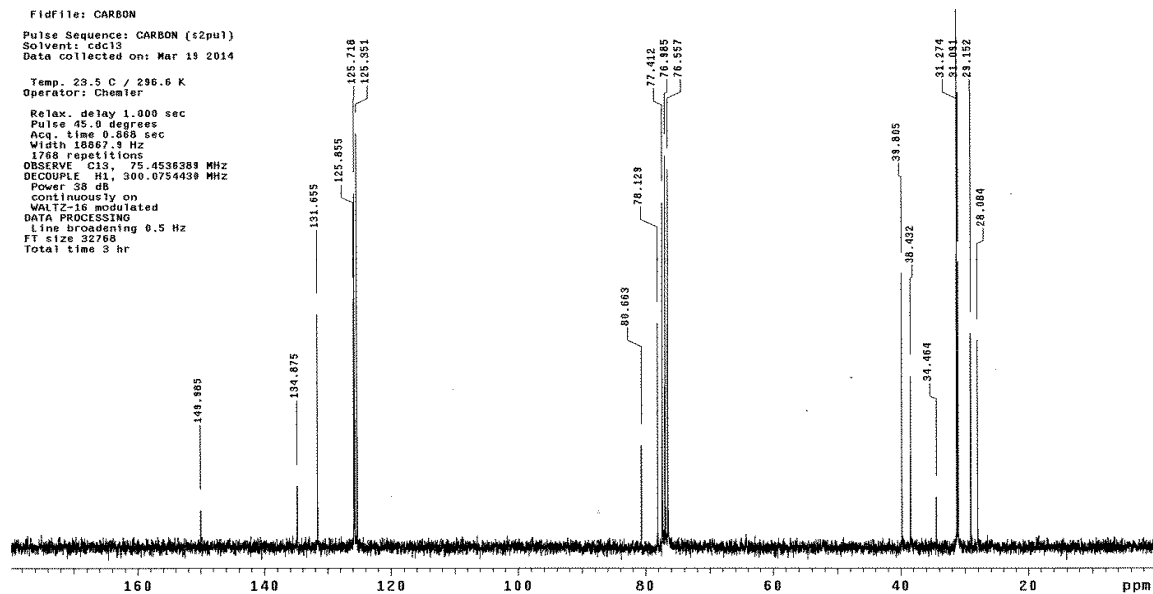

## SUPPORTING INFORMATION

### Enantioselective Copper-Catalyzed Intra- and Intermolecular Carboetherification of Unactivated Alkenes

#### COMPUTATIONAL DETAILS

Unrestricted Density Functional Theory (DFT) calculations (geometry optimizations, vibrational frequencies) were carried out at the hybrid Generalized Gradient Approximation (GGA) level using the Gaussian 09 software.<sup>1</sup> The UB3LYP<sup>2</sup> functional was coupled with a 6-31+G(d) basis set<sup>3</sup> applied on all atoms (*i.e.*, H, C, N, O, Cu). Trifluorotoluene ( $\epsilon = 9.18$ ) was employed in the experiment; however parameters for this solvent are not available in Gaussian. Because of this the solvation free energy ( $\Delta G_{\text{solv}}$ ) was computed using the default Polarizable Continuum Model (PCM) in Gaussian and parameters for dichloromethane ( $\epsilon = 8.93$ ).<sup>4</sup> We have previously used parameters for 1,2-dichloroethane ( $\epsilon = 10.13$ ) to model trifluorotoluene<sup>5</sup>, but since its dielectric constant is closer to dichloromethane, we employ the latter solvent here instead. Tests revealed that the relative energies of species which may be important in the reaction mechanism did not change much when geometry optimizations and frequency calculations were carried out in solution. For this reason, we chose to calculate the solvation free energy by carrying out single point calculations on geometries which were stationary points in the gas phase. The thermochemical data was obtained for 373.15 K, in accordance with the experimental conditions. Analysis of vibrational frequencies showed that the optimized structures had all real normal modes, whereas the transition states possessed only one imaginary frequency. The Intrinsic Reaction Coordinate (IRC) method<sup>6</sup> was employed to find the initial coordinates of the product species, which result from considering the path of steepest descent for each transition state (TS). The geometries found in this way were then confirmed to be minima of the potential energy surface. The spin density and Natural Bond Order (NBO) analysis using NBO 3.1<sup>7</sup> version for Gaussian were performed at the UB3LYP/6-31+G(d) level of theory for the pro-S (aka major) and pro-R (aka minor) transition states. Plots visualizing the spin density were prepared with the Avogadro (1.1.0)<sup>8</sup> open source molecular editor and visualizer, using Cartesian coordinates of the gas phase species. The so-called tetrahedral twist angle ( $\theta_{\text{TTA}}$ ) is used to define the angle between two planes: the first containing two nitrogen atoms of bis(oxazoline) ligand and the Cu atom; the second contains the carbon atom bonded to Cu (which belongs to the 6-member heterocyclic ring in a chair conformation), the O atom bonded to Cu (also in the ring), and Cu (see Fig 1).  $\theta_{\text{TTA}}$  was measured using the Mercury 2.4 program.<sup>9</sup>

The basis set superposition error (BSSE) was calculated via the Counterpoise method.<sup>10</sup> The major transition state was used to estimate the BSSE, with its structure being split into two fragments. These were chosen based on the last step of the mechanism, *i.e.*, the C-[Cu] homolysis step of the carboetherification. Frontier Density Surfaces (FDS) were visualized for both transition states using WebMO.<sup>11</sup> These plots are obtained from the magnitudes of the gradient of the electron density maps for the molecular orbitals available for attack by an electrophile, nucleophile, or a radical. Furthermore an electrostatic potential map was created to illustrate the charge distribution for both transition states in vacuum and dichloromethane. This in addition to the electrophilic MO, nucleophilic MO, and radical FDS can be used as an aid to describe the electronic structure of the transition states. Below we use the term “iso values MO and ED” in order to refer to the isosurface value used to plot the molecular orbitals and electron density, respectively. The electron density colored by the electrostatic potential in Figure 7 was calculated using the Amsterdam Density Functional (ADF) program package,<sup>12</sup> the B3LYP functional and a small frozen core ATZP (augmented triple-zeta basis sets with added polarization functions from the ADF basis set library) on the geometries optimized with the Gaussian program code. Herein, we provide the electrostatic potential calculated with ADF because of the powerful visualization capabilities provided by the ADF-GUI (graphical user interface).

## TRANSITION STATE ANALYSIS

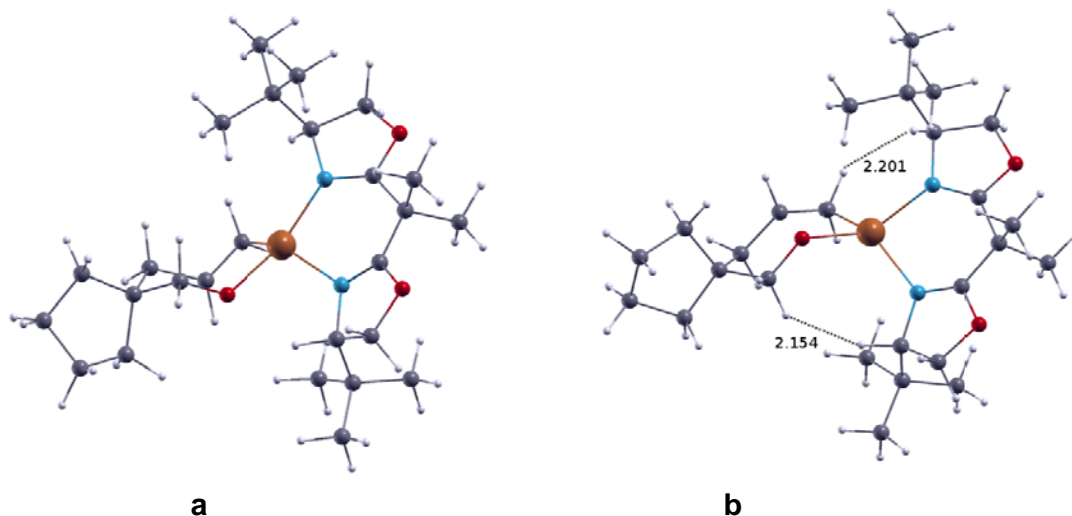

$\Delta\Delta G^\ddagger = 1.59$  kcal/mol and %ee = 79.1

**Fig. 1** Structural representation of the major (a) and minor (b) transition states. H – H distances of less than or equal to 2.2 Å are shown, *i.e.*, one between a substrate terminal alkene H and a ligand backbone

H as well as one between a substrate carbon H and a ligand backbone H. The color code for atoms is as follows: H – white, O – red, N – blue, C – gray, and Cu – orange-bronze.

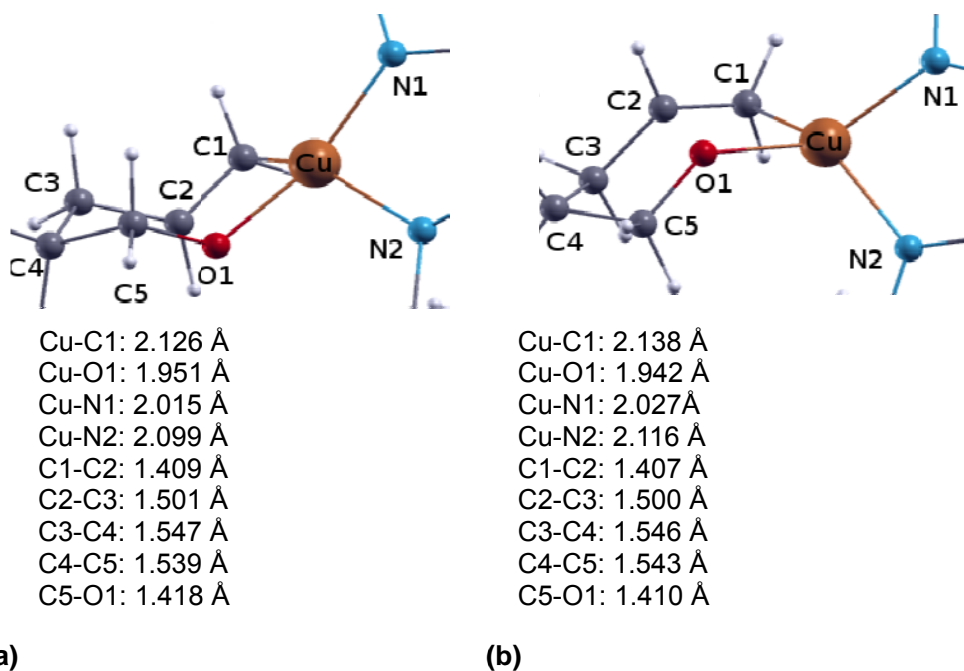

**Fig. 2** A zoomed-in view of the first coordination shell around the Cu atom for the major (a) and minor (b) transition states.

#### Natural Bond Order Analysis

The NBO orbital analysis shows that for the major transition state in vacuum the Cu – C bonding orbital is composed from the atomic orbitals of the first C of the (1-allylcyclopentyl)methanol ligand and the metal center. This NBO is singly occupied ( $\beta$ -spin) and formed due to an overlap between the C p orbital and the Cu d orbital. Both orbitals contribute about 50% to this NBO. The overlap-weighted natural atomic orbital bond order indicates that there is about (30%) overlap between these orbitals. Not surprisingly the addition of the solvent via single-point calculations does not influence this analysis. Also although it appears that there is no bonding orbital between the Cu and the O atom the second most important overlap is between these two atoms. A similar situation is found for the interaction of the metal center with the N atoms. Despite a 17 degree difference between  $\theta_{\text{TTA}}$  calculated for both transition states (see below) the NBO analysis for the major TS is very comparable to the results obtained for the minor TS.

### Spin density

The most important contributions computed for the major and minor transition states in vacuum and solvent are presented in Table 1, and illustrated in Fig 2 a – d with the iso value set to 0.0005 au.

Table 1. Spin densities of major and minor transition states.

| Major TS (vacuum)          |                                                  |                      | Minor TS (vacuum)          |                                                  |                      |
|----------------------------|--------------------------------------------------|----------------------|----------------------------|--------------------------------------------------|----------------------|
| Atom                       | Description                                      | Percentage           | Atom                       | Description                                      | Percentage           |
| Cu                         | —                                                | 45.1 %               | Cu                         | —                                                | 46.0 %               |
| C1                         | connecting Cu with CYPN through propane          | 27.2 %               | C1                         | connecting Cu with CYPN through propane          | 27.7 %               |
| O1                         | connecting Cu with CYPN through methyl           | 22.1 %               | O1                         | connecting Cu with CYPN through methyl           | 24.1 %               |
| N1 + N2                    | connecting Cu with 5-membered heterocyclic rings | 3.48 + 2.54 = 6.02 % | N1 + N2                    | connecting Cu with 5-membered heterocyclic rings | 2.58 + 1.44 = 4.02 % |
| Major TS (dichloromethane) |                                                  |                      | Minor TS (dichloromethane) |                                                  |                      |
| Cu                         | —                                                | 46.1 %               | Cu                         | —                                                | 47.3 %               |
| C1                         | connecting Cu with CYPN through propane          | 26.3 %               | C1                         | connecting Cu with CYPN through propane          | 26.9 %               |
| O1                         | connecting Cu with CYPN through methyl           | 21.1 %               | O1                         | connecting Cu with CYPN through methyl           | 22.5 %               |
| N1 + N2                    | connecting Cu with 5-membered heterocyclic rings | 3.72 + 2.63 = 6.35 % | N1 + N2                    | connecting Cu with 5-membered heterocyclic rings | 2.80 + 1.60 = 4.40 % |

CYPN – cyclopentyl

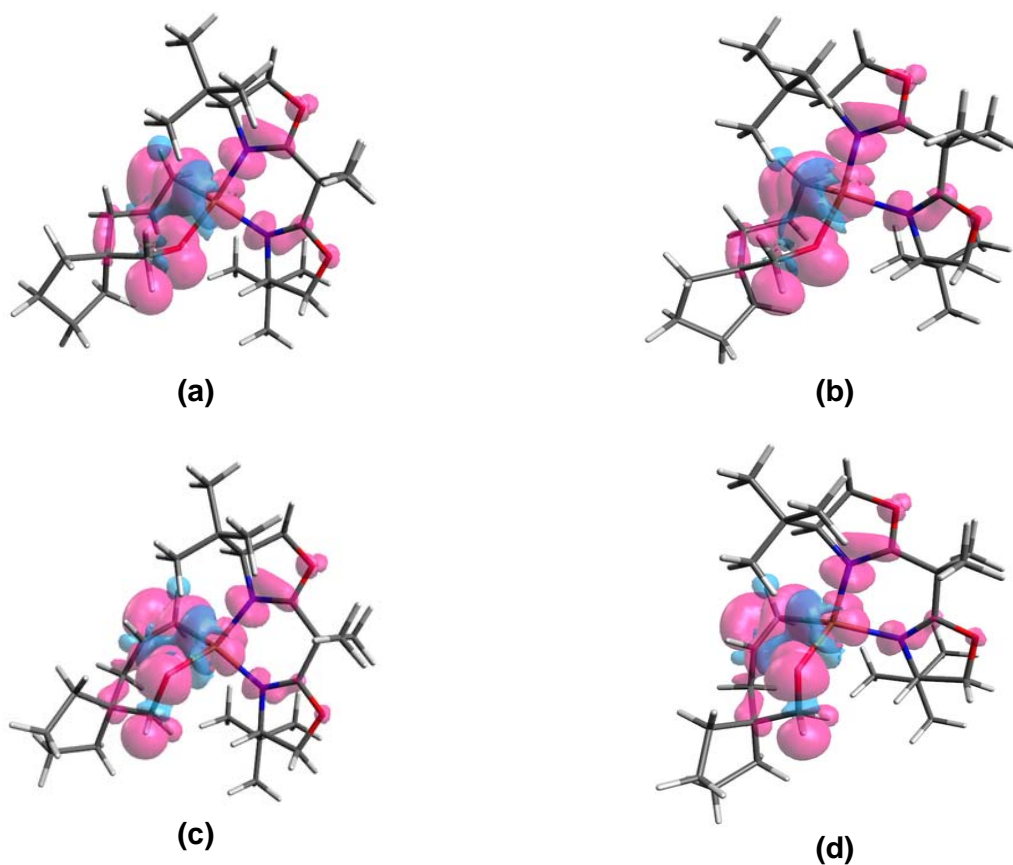

**Fig. 3** Spin Densities for the major transition state in vacuum (a) and in dichloromethene (b), and for minor transition state in vacuum (c) and in dichloromethane (d).

It was found that 93% of the SOMO resides on Cu (46%), O1 (21%) and C1 (26%) for the major TS. In the case of the minor TS 97% of the SOMO also resides on these atoms however its composition is slightly different, *i.e.*, Cu (47%), O1 (23%) and C1 (27%). Hence it is fair to state that these two transition states highly resemble one another. The most striking difference found between the major and minor TS is the relationship between N-Cu and O-Cu bond distances and their corresponding  $N_{LP} \rightarrow Cu_{LP^*}$  and  $O_{LP} \rightarrow Cu_{LP^*}$  NBO donor-acceptor stabilization energies (Table 2).

**Table 2.** Selected  $\beta$ -spin NBO donor-acceptor stabilization energies and bond distances for major and minor transition states. Each NBO is labeled as: BD – bond, LP – valence lone pair, and the asterisk indicates a non-Lewis orbital.

|                 | Donor $\rightarrow$ acceptor                            | $E_{\text{NBO}}$ (kcal/mol) | Corresponding bond distance (Å) |
|-----------------|---------------------------------------------------------|-----------------------------|---------------------------------|
| <b>Major TS</b> | C2-O1 <sub>(BD)</sub> $\rightarrow$ Cu <sub>(LP*)</sub> | 16.21                       | 2.049                           |
|                 | O1 <sub>(LP)</sub> $\rightarrow$ Cu <sub>(LP*)</sub>    | 28.46                       | 1.951                           |
|                 | N1 <sub>(LP)</sub> $\rightarrow$ Cu <sub>(LP*)</sub>    | 30.65                       | 2.015                           |
|                 | N2 <sub>(LP)</sub> $\rightarrow$ Cu <sub>(LP*)</sub>    | 20.32                       | 2.099                           |
| <b>Minor TS</b> | C2-O1 <sub>(BD)</sub> $\rightarrow$ Cu <sub>(LP*)</sub> | 13.34                       | 2.044                           |
|                 | O1 <sub>(LP)</sub> $\rightarrow$ Cu <sub>(LP*)</sub>    | 13.67                       | 1.942                           |
|                 | N1 <sub>(LP)</sub> $\rightarrow$ Cu <sub>(LP*)</sub>    | 26.28                       | 2.029                           |
|                 | N2 <sub>(LP)</sub> $\rightarrow$ Cu <sub>(LP*)</sub>    | 14.27                       | 2.116                           |

The NBO donor - acceptor stabilization energy ( $E_{\text{NBO}}$ ) reveals that C2-O1 contributes about 16 kcal/mol, whereas the same bond in the minor TS contributes almost 3 kcal/mol less towards  $E_{\text{NBO}}$ . Moreover, N(1,2)  $\rightarrow$  Cu is very comparable for both transition states. However, the O1 $\rightarrow$ Cu gives about 50% more NBO stabilization energy in the major TS as compared to the minor TS.

An analysis of the Wiberg bond indices<sup>13</sup> (WIB) showed that within the major TS about 68% of the C1-Cu and 45% of C2-O1 bond is formed (see Table3). In order to obtain a percentage of the formed bond first the relative variation of the WIB has to be calculated as:<sup>14</sup>

$$\Delta BO_{A-B} = (W_{A-B}^{TS} - W_{A-B}^R) / (W_{A-B}^{IntP} - W_{A-B}^R) \quad [1]$$

where  $W$  is the total WIB for a given bond, A-B, in the NAO basis (i.e.,  $\sum W_{A-B}(\alpha) + W_{A-B}(\beta)$ ). The superscripts  $R$ ,  $TS$ , and  $IntP$  refer to reactant, transition state, and intermediate product, respectively.

Since the C1-Cu and C2-O1 bonds are not present in the starting material their WIB indexes are 0. Therefore Eq. (1) may be simplified to:

$$\Delta BO_{A-B} = (W_{A-B}^{TS}) / (W_{A-B}^{IntP}) \quad [2]$$

Hence the percentage evolution (%EV)<sup>15</sup> for a given A-B bond order is obtained as shown below:

$$\%EV = 100\Delta BO_{A-B} \quad [3]$$

Note that for the O1-Cu bond Eq. (1) has to be used, and the WIB is assumed to be 1. In this case the percentage indicates how much of this bond is broken.

**Table 3.**  $\Delta BO_{A-B}$  and total WIB for the intermediate product and the major transition state obtained in vacuum.

|                      | Major TS | Intermediate Product |
|----------------------|----------|----------------------|
| WIB <sub>C1-Cu</sub> | 0.1965   | 0.2897               |
| WIB <sub>C2-O1</sub> | 0.1775   | 0.3984               |
| WIB <sub>O1-Cu</sub> | 0.1844   | 0.1015               |
| $\Delta BO_{C1-Cu}$  | 0.6783   | —                    |
| $\Delta BO_{C2-O1}$  | 0.4455   | —                    |
| $\Delta BO_{O1-Cu}$  | 0.9077   | —                    |

The results computed with inclusion of solvent do not have a significant effect on the WIB values. Hence the  $\Delta BO_{A-B}$  and corresponding percentages are very similar.

Taken all together (*i.e.*, NBO, WBI,  $E_{NBO}$ , etc.) it seems that the major TS is preferred, due to a highly stabilizing NBO donor-acceptor energy for O1→Cu, which may be related to the formation of the C2-O1 bond and breaking of the Cu-O1 bond.

### Mulliken charges

In order to illustrate the change in the charge distribution that occurs when the carboetherification reaction progresses from the starting material (SM) to the major TS the Mulliken charges were computed in dichloromethane, see Figure 4. It is important to note that results obtained in vacuum are very similar.

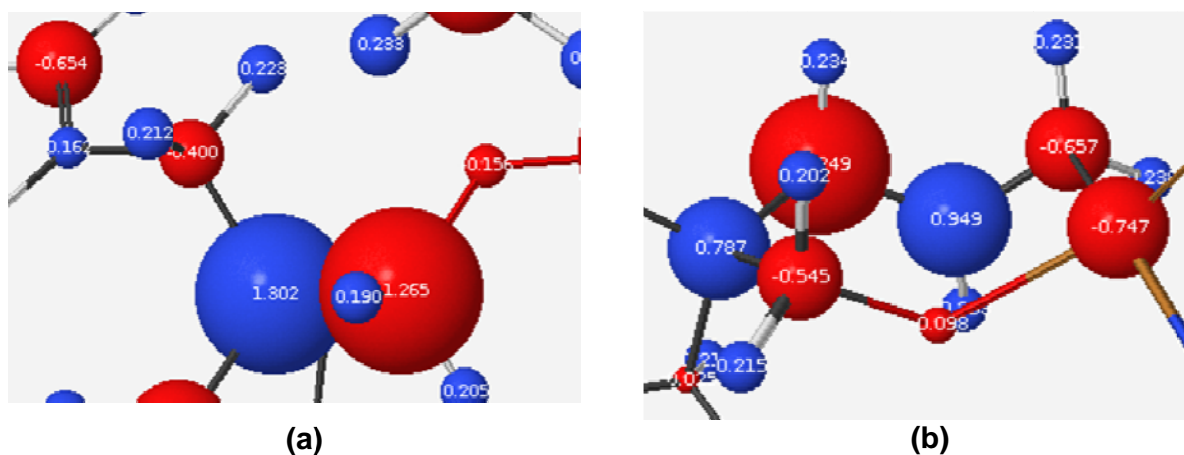

**Fig. 4** Mulliken charges for the starting material (a) and the major transition state (b) obtained in dichloromethane. Red indicates negative charge, while blue positive charge.

Additionally Table 4 contains values of Mulliken charges for the most important atoms obtained for SM and major TS as well as for the minor TS in both environments.

**Table 4.** Mulliken charges for select atoms of the major and minor transition states obtained in vacuum and dichloromethane.

| Atom | Vacuum  |          |        | Dichloromethane |          |        |
|------|---------|----------|--------|-----------------|----------|--------|
|      | SM      | Major TS | Minor  | SM              | Major TS | Minor  |
| C1   | -0.641  | -0.604   | -0.782 | -0.654          | -0.657   | -0.829 |
| C2   | +0.197  | +0.927   | +1.193 | +0.162          | +0.949   | +1.222 |
| O1   | -0.127  | -0.795   | -0.032 | -0.156          | -0.098   | -0.079 |
| C5   | + 1.310 | -0.551   | -0.156 | 1.302           | -0.545   | -0.140 |

#### Tetrahedral twist angle

For the major TS the value of the tetrahedral twist angle is 43.52 degrees, so about 16.5 degrees less than a perfect tetrahedron whereas the minor TS has  $\theta_{TTA}=60.90$  degrees, which is only slightly more than the twist angle for  $T_d$ .

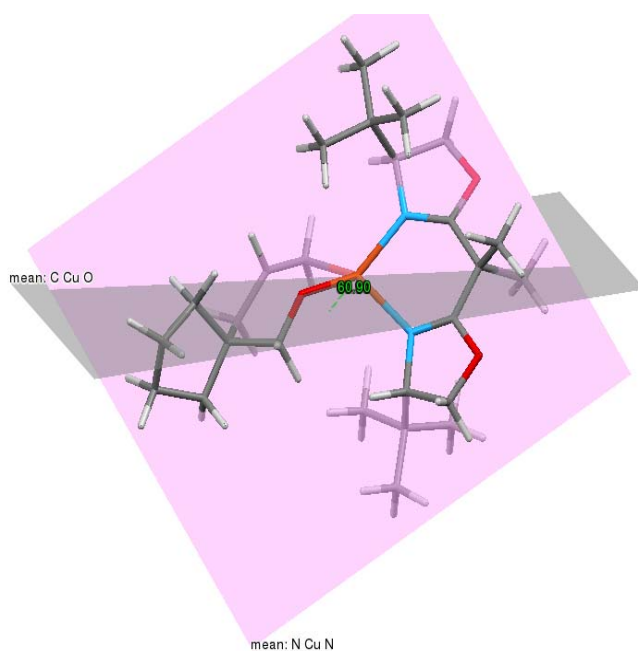

(a)

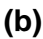

**Fig. 5** Graphic representation of the tetrahedral twist angles:  $\theta_{\text{TTA}} = 60.9^\circ$  and  $43.5^\circ$ , for the minor (a) and major (b) transition states, respectively.

### Basis Set Supper Position Error (BSSE)

The BSSE for the 6-31+G(d) basis set ( $\Delta E_{\text{BSSE}}=2.7$  kcal/mol) obtained at 0K in vacuum is about an order of magnitude smaller than the BSSE computed using the 6-31G(d) basis set. In fact, combining the 6-31G(d) with a different basis set on the metal center reduced the BSSE, but not as significantly. In particular the 6-31G(d) was applied to all atoms except Cu for which two different small-core effective core-potential (ECP) and corresponding basis sets were employed. The BSSE calculated using the following levels of theory B3LYP/6-31G(d)[Cu-LL2DZ] (where LL2DZ stands for Las Alamos LAN2DZ<sup>12</sup>) and B3LYP/6-31G(d)[Cu-SRSC] (where SRSC denotes Stuttgart RSC 1997 EPC<sup>12</sup>) were  $\Delta E_{\text{BSSE}}=8.0$  kcal/mol and  $\Delta E_{\text{BSSE}}=7.0$  kcal/mol, respectively. Hence using the 6-31+G(d) basis set not only reduces the BSSE but also is recommended for ionic and/or species with unpaired electron(s) since this basis set includes diffuse basis functions.

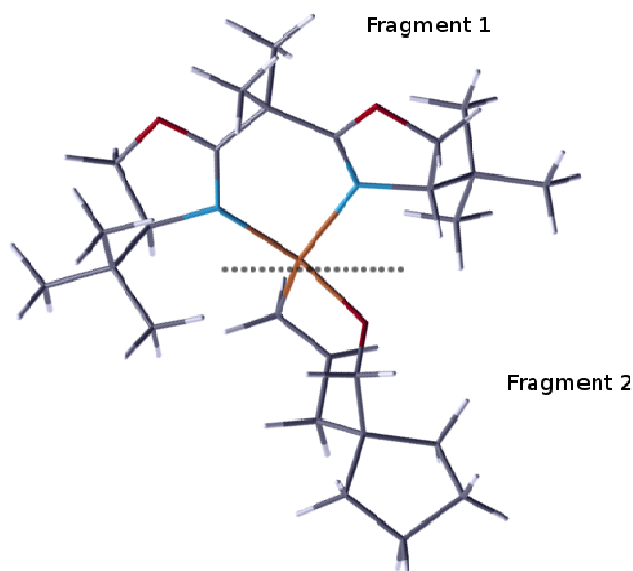

**Fig. 6** Graphic representation of fragments used to calculate the BSSE. The gray dotted line indicates where the major TS was “cut” in order to define two counterpoise fragments.

## MOLECULAR PROPERTIES

Images of the electrostatic potential, electrophilic, nucleophilic and radical FDS, for the major and minor transition states in vacuum and dichloromethane are shown below.

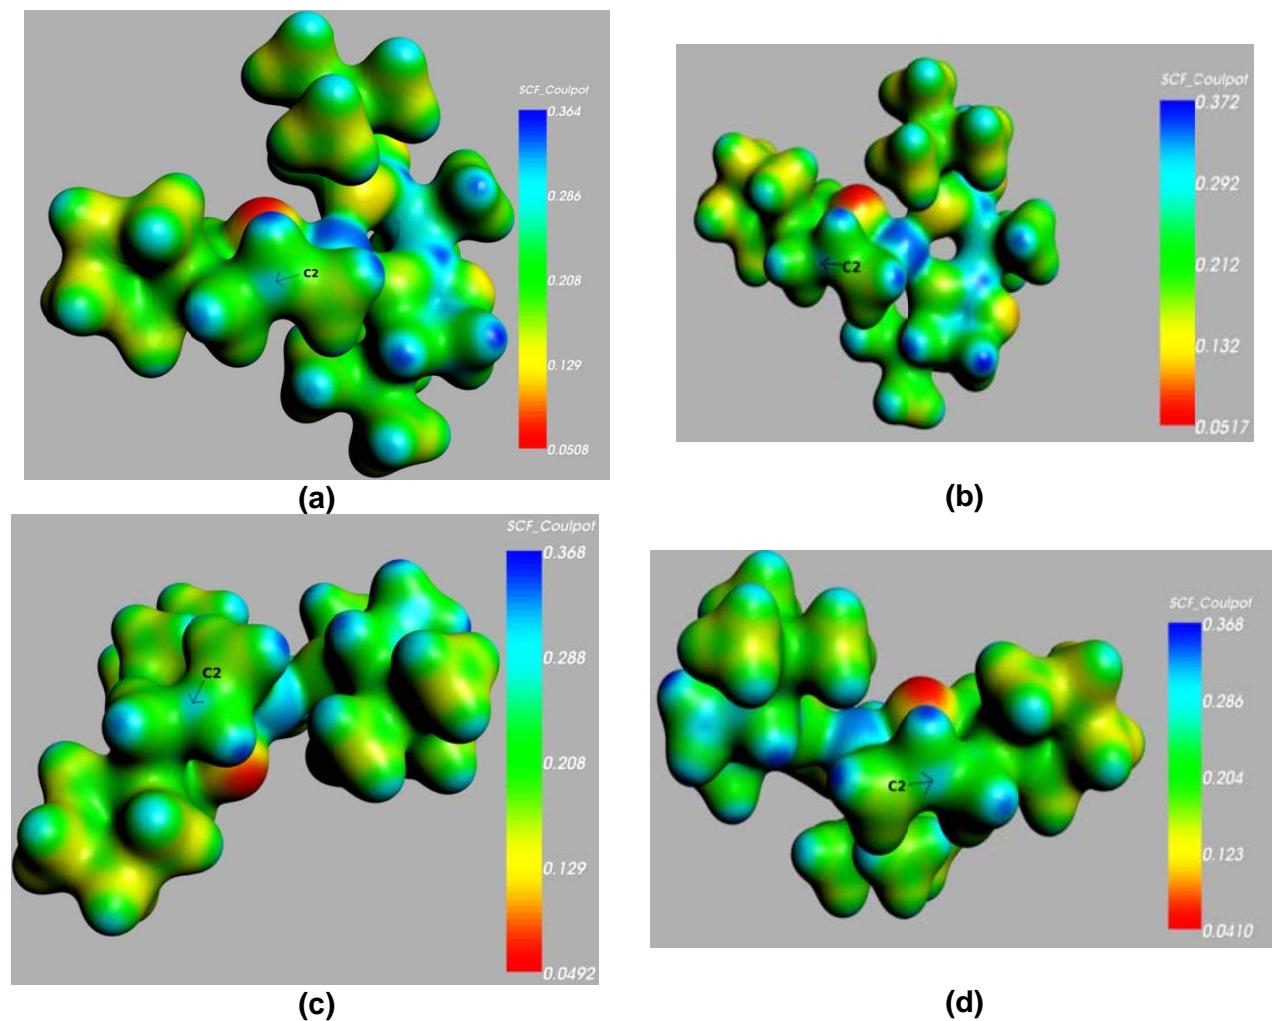

**Fig. 7** Electrostatic potentials for the: a) major TS in vacuum, b) major TS in dichloromethane, and the c) minor transition state in vacuum, and d) minor TS in dichloromethane. The isosurface for the electron density was 0.03 au, and the color bar illustrates the value of the electrostatic potential.

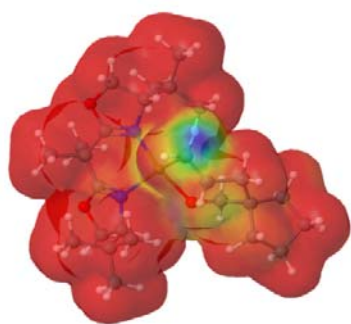

(a)

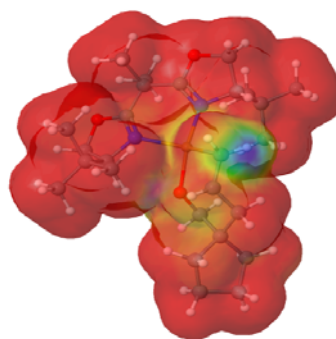

(b)

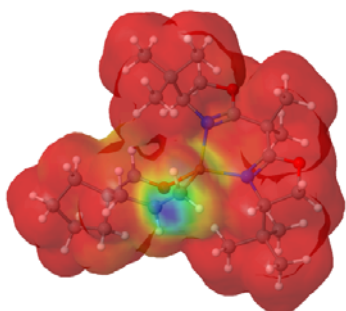

(c)

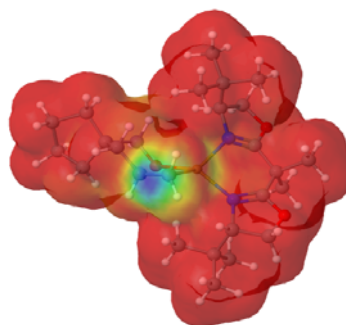

(d)

**Fig. 8** Electrophilic MO FDS of the: a) major TS in vacuum, b) major TS in dichloromethane, and the c) minor transition state in vacuum, and d) minor TS in dichloromethane. Iso values MO and ED are set to 0.05 and 0.003 au. The blue color indicates the most susceptible regions to be attacked by an electrophile.

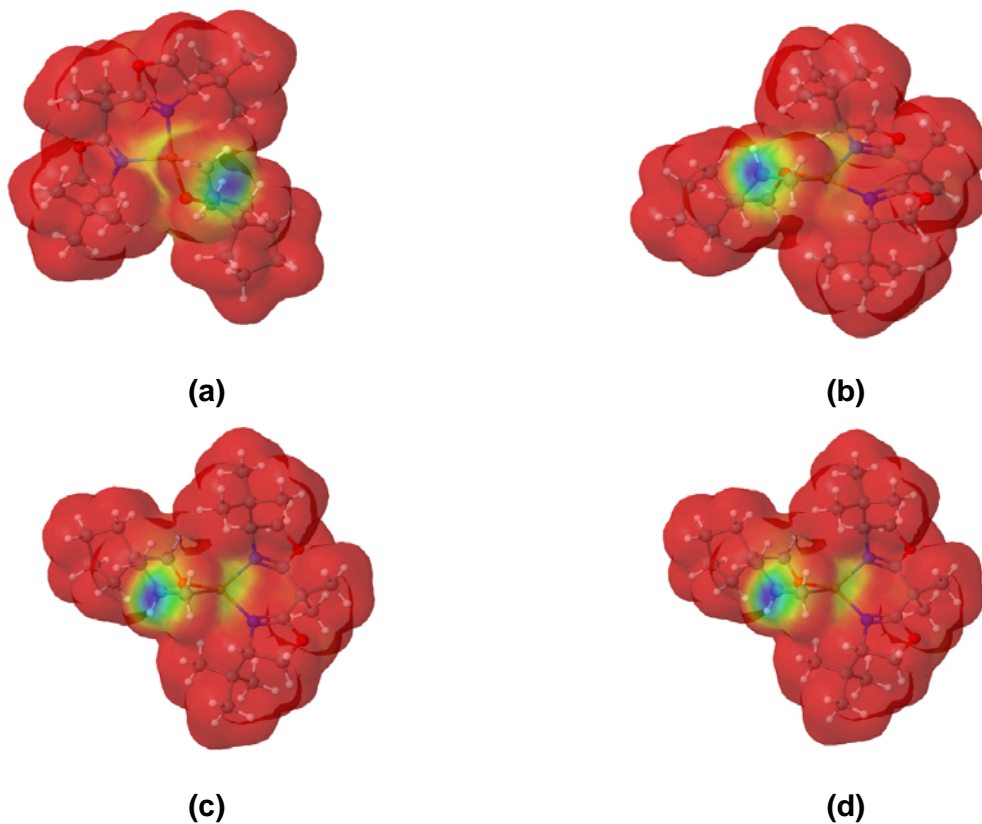

**Fig. 9** Nucleophilic MO FDS of the: a) major TS in vacuum, b) major TS in dichloromethane, and the c) minor transition state in vacuum, and d) minor TS in dichloromethane. Iso values MO and ED are set to 0.05 and 0.003 au. The blue color indicates the most susceptible regions to be attacked by a nucleophile.

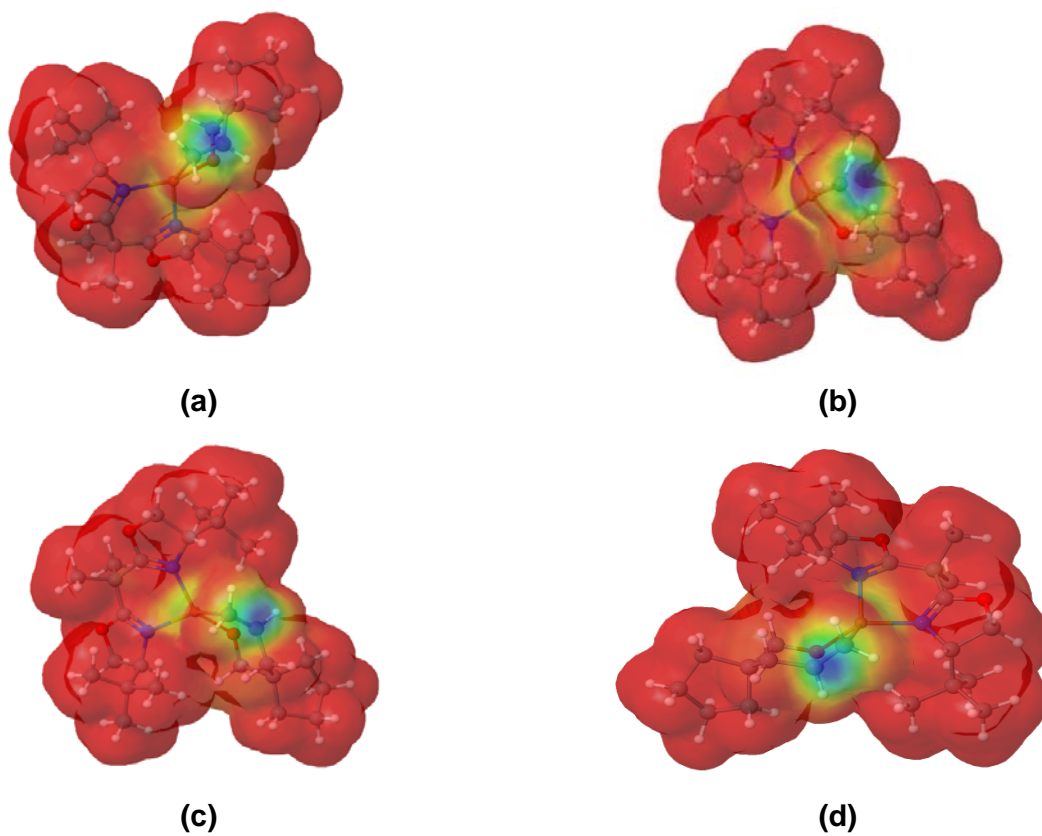

**Fig. 10** Radical FDS of the: a) major TS in vacuum, b) major TS in dichloromethane, and the c) minor transition state in vacuum, and d) minor TS in dichlormorthane. Iso values MO and ED are set to 0.05 and 0.003 au. The blue color indicates the most susceptible regions to be attacked by a radical.

## CARTESIAN COORDINATES

### [C<sub>26</sub>H<sub>45</sub>CuN<sub>2</sub>O<sub>3</sub>]<sup>+</sup> (Major TS)

|    |             |             |             |
|----|-------------|-------------|-------------|
| C  | 0.00000000  | 0.00000000  | 0.00000000  |
| C  | 1.27421500  | 0.45748700  | 0.38872600  |
| C  | 2.31183200  | -0.45012700 | 0.98344100  |
| C  | 2.93609300  | 0.16960400  | 2.25621500  |
| C  | 1.69784400  | 0.64694800  | 3.03623500  |
| O  | 0.88071500  | 1.40712900  | 2.16166100  |
| Cu | -0.94393400 | 0.93043500  | 1.66215100  |
| N  | -2.75236900 | 0.04396800  | 1.73092100  |
| C  | -3.87874700 | 0.64631600  | 1.93500800  |
| O  | -4.98260000 | -0.01963900 | 1.57321300  |
| C  | -4.54761700 | -1.22658600 | 0.88155500  |
| C  | -3.05867000 | -1.34627200 | 1.26394700  |
| H  | -2.45310000 | -1.55050100 | 0.37700600  |
| C  | -2.73895200 | -2.44671700 | 2.32972400  |
| C  | -1.24555300 | -2.40766600 | 2.70586900  |
| H  | -0.60396800 | -2.56247900 | 1.83064800  |
| H  | -1.02030100 | -3.20645100 | 3.42140100  |
| H  | -0.96653500 | -1.45859500 | 3.17708400  |
| C  | -3.03993500 | -3.81995800 | 1.68964000  |
| H  | -2.45814000 | -3.97146500 | 0.77164500  |
| H  | -4.09997500 | -3.94893800 | 1.44311800  |
| H  | -2.77340600 | -4.62334500 | 2.38506800  |
| C  | -3.57990100 | -2.27156900 | 3.60934000  |
| H  | -3.36684000 | -1.31861600 | 4.10680100  |
| H  | -3.34198300 | -3.06940400 | 4.32141500  |
| H  | -4.65759100 | -2.32424900 | 3.41725600  |
| H  | -4.70853900 | -1.06120600 | -0.18772200 |
| H  | -5.18252700 | -2.04156900 | 1.22497200  |
| C  | -4.18278300 | 1.97567900  | 2.60247500  |
| C  | -2.96038600 | 2.84326500  | 2.82087400  |
| N  | -1.79506900 | 2.74388700  | 2.28730100  |
| C  | -1.01395300 | 3.95763000  | 2.66496200  |
| C  | -1.88322200 | 4.55898800  | 3.79211700  |
| O  | -3.17309300 | 3.89023800  | 3.63298700  |
| H  | -2.06519500 | 5.63016600  | 3.71664300  |
| H  | -1.52076900 | 4.31900800  | 4.79586800  |
| C  | -0.74463000 | 4.91167800  | 1.45601500  |
| C  | -2.04932000 | 5.48040000  | 0.86459900  |
| H  | -2.70615000 | 4.68392000  | 0.49640400  |
| H  | -1.81941500 | 6.13098200  | 0.01337300  |
| H  | -2.61349700 | 6.08385000  | 1.58522800  |
| C  | 0.01652600  | 4.15103300  | 0.35299700  |
| H  | -0.60065600 | 3.35815900  | -0.08491500 |
| H  | 0.93256600  | 3.69677200  | 0.74487100  |
| H  | 0.29196400  | 4.83881500  | -0.45466000 |
| C  | 0.14755200  | 6.06641600  | 1.96056100  |
| H  | -0.34254500 | 6.66979900  | 2.73376500  |
| H  | 0.39250100  | 6.74227200  | 1.13357800  |

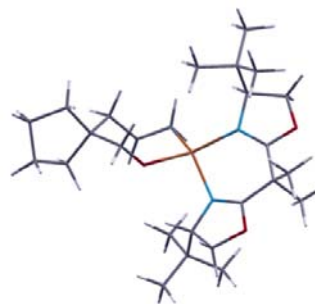

|   |             |             |             |
|---|-------------|-------------|-------------|
| H | 1.09221100  | 5.69088600  | 2.37320000  |
| H | -0.04604600 | 3.62162500  | 3.04615000  |
| C | -5.17533800 | 2.78488900  | 1.71501900  |
| H | -4.75783000 | 2.97522700  | 0.72122700  |
| H | -5.39276000 | 3.74312000  | 2.19275300  |
| H | -6.10847600 | 2.22929800  | 1.60155100  |
| C | -4.85440000 | 1.66189800  | 3.97251000  |
| H | -4.16924100 | 1.13264800  | 4.64247400  |
| H | -5.74196000 | 1.04460600  | 3.81678700  |
| H | -5.15402000 | 2.59561400  | 4.45247500  |
| H | 1.15962900  | -0.21631200 | 3.45984200  |
| H | 1.98849500  | 1.29563400  | 3.87711700  |
| C | 3.89678000  | 1.35905400  | 1.94227100  |
| C | 5.04836500  | 1.22953500  | 2.95495400  |
| C | 5.24083400  | -0.29066600 | 3.06791100  |
| C | 3.79841400  | -0.83762100 | 3.08109800  |
| H | 3.73097300  | -1.85867200 | 2.68838400  |
| H | 3.42562600  | -0.87624600 | 4.11451600  |
| H | 5.81434000  | -0.59320600 | 3.95038600  |
| H | 5.78086700  | -0.66203300 | 2.18658200  |
| H | 4.75173300  | 1.64476600  | 3.92856300  |
| H | 5.95225000  | 1.76110100  | 2.63870000  |
| H | 3.38433400  | 2.32635100  | 1.98754300  |
| H | 4.29882700  | 1.25772500  | 0.92450100  |
| H | 3.08738600  | -0.62789600 | 0.22529600  |
| H | 1.85878700  | -1.42133400 | 1.21894300  |
| H | 1.63134300  | 1.39535200  | -0.02713700 |
| H | -0.20384200 | -1.06554000 | 0.07543900  |
| H | -0.52503300 | 0.52651700  | -0.79788500 |

### **[C<sub>26</sub>H<sub>45</sub>CuN<sub>2</sub>O<sub>3</sub>]<sup>+</sup> (Minor TS)**

|    |             |             |             |
|----|-------------|-------------|-------------|
| C  | 0.00000000  | 0.00000000  | 0.00000000  |
| C  | -1.35624900 | -0.62968200 | 0.11620200  |
| C  | -2.47425100 | -0.25095900 | -0.64881400 |
| H  | -3.20860100 | -1.00945200 | -0.90558400 |
| H  | -2.36380000 | 0.56231600  | -1.36630000 |
| Cu | -3.37034100 | 0.76448300  | 1.00551500  |
| O  | -1.72176100 | 0.27842000  | 1.91032300  |
| C  | -0.50630300 | 0.94995800  | 2.15760400  |
| C  | 0.62241600  | 0.22213600  | 1.39721900  |
| C  | 1.94218800  | 1.05478200  | 1.37097500  |
| C  | 3.06139200  | 0.11112500  | 1.85521200  |
| C  | 2.33425800  | -0.83213300 | 2.82556200  |
| C  | 1.00650500  | -1.11802000 | 2.10117300  |
| H  | 1.16875900  | -1.90282500 | 1.34894100  |
| H  | 0.21568900  | -1.47561700 | 2.77005200  |
| H  | 2.14700200  | -0.31860700 | 3.77912200  |
| H  | 2.89689600  | -1.74361500 | 3.05373000  |
| H  | 3.89792500  | 0.64932400  | 2.31317900  |
| H  | 3.46718100  | -0.46418800 | 1.01215200  |
| H  | 1.85186000  | 1.90275500  | 2.06484900  |
| H  | 2.14396700  | 1.48130900  | 0.38148900  |

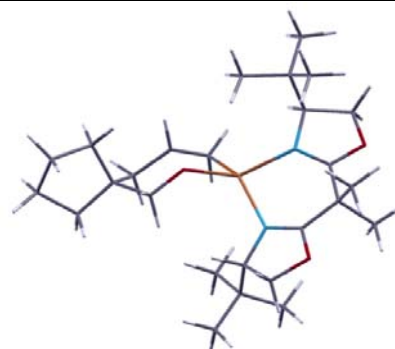

|   |             |             |             |
|---|-------------|-------------|-------------|
| H | -0.54781900 | 2.00462700  | 1.84591600  |
| H | -0.32048800 | 0.93163700  | 3.24289900  |
| N | -5.31925500 | 0.20951000  | 0.97055600  |
| C | -6.32536100 | 0.97777600  | 1.22574000  |
| O | -7.53549400 | 0.50914100  | 0.89361200  |
| C | -7.32982500 | -0.73934000 | 0.17333600  |
| C | -5.85809400 | -1.09745100 | 0.47258800  |
| H | -5.33516800 | -1.35123200 | -0.45377300 |
| C | -5.66176700 | -2.28455400 | 1.47270100  |
| C | -4.16176700 | -2.52545700 | 1.72955900  |
| H | -3.62862900 | -2.74786600 | 0.79708000  |
| H | -4.03344000 | -3.39023700 | 2.39042500  |
| H | -3.67675600 | -1.67132000 | 2.21259700  |
| C | -6.24469200 | -3.55432800 | 0.81291500  |
| H | -5.77187700 | -3.75711800 | -0.15648900 |
| H | -7.32743900 | -3.49384500 | 0.65495300  |
| H | -6.06381700 | -4.42354400 | 1.45465400  |
| C | -6.36620100 | -2.02459800 | 2.81841300  |
| H | -5.94967900 | -1.14942200 | 3.32948300  |
| H | -6.22690500 | -2.88497000 | 3.48219900  |
| H | -7.44691500 | -1.87676900 | 2.70804400  |
| H | -7.52113600 | -0.53736900 | -0.88446400 |
| H | -8.06397700 | -1.45097900 | 0.54754100  |
| C | -6.39003200 | 2.31592200  | 1.93862300  |
| C | -5.05562200 | 3.02208900  | 2.07267600  |
| N | -3.91043200 | 2.73362200  | 1.56013700  |
| C | -2.99145500 | 3.87699100  | 1.84596100  |
| C | -3.77311300 | 4.66103700  | 2.92274400  |
| O | -5.13099500 | 4.14742000  | 2.80243500  |
| H | -3.82029000 | 5.73836800  | 2.76974000  |
| H | -3.43567000 | 4.45001800  | 3.94165900  |
| C | -2.62000500 | 4.69829500  | 0.56833000  |
| C | -3.85837300 | 5.34981800  | -0.07825000 |
| H | -4.58435500 | 4.59697500  | -0.40581800 |
| H | -3.55845300 | 5.92026400  | -0.96426000 |
| H | -4.36825900 | 6.04801900  | 0.59527700  |
| C | -1.94566400 | 3.77659800  | -0.46525300 |
| H | -2.63062300 | 2.99923400  | -0.81972300 |
| H | -1.05435300 | 3.29154200  | -0.04945800 |
| H | -1.62536800 | 4.35855300  | -1.33685700 |
| C | -1.61128000 | 5.79047400  | 0.98468900  |
| H | -2.03751500 | 6.50924400  | 1.69441100  |
| H | -1.29037200 | 6.36032600  | 0.10562400  |
| H | -0.71362300 | 5.35614900  | 1.44284200  |
| H | -2.06596000 | 3.47381900  | 2.26542000  |
| C | -7.34658100 | 3.26998900  | 1.16312900  |
| H | -6.98795700 | 3.45222000  | 0.14482800  |
| H | -7.41390200 | 4.22589400  | 1.68654500  |
| H | -8.34295800 | 2.82808200  | 1.10617100  |
| C | -6.96932400 | 2.04729200  | 3.36173200  |
| H | -6.30213700 | 1.40880500  | 3.94958500  |
| H | -7.94241400 | 1.55757100  | 3.27849700  |

|   |             |             |             |
|---|-------------|-------------|-------------|
| H | -7.09758100 | 2.99562900  | 3.88778300  |
| H | -1.38128300 | -1.61064000 | 0.58369700  |
| H | -0.07214600 | 0.94637000  | -0.55068100 |
| H | 0.63409200  | -0.67285200 | -0.59517900 |

**C<sub>27</sub>H<sub>45</sub>CuF<sub>3</sub>N<sub>2</sub>O<sub>6</sub>S (tBu-SM, 4-coord)**

|    |            |             |             |
|----|------------|-------------|-------------|
| C  | 0.00000000 | 0.00000000  | 0.00000000  |
| C  | 0.46916600 | -1.47689400 | 0.11621500  |
| C  | 1.88510400 | -1.49416900 | 0.75972600  |
| H  | 1.78512100 | -1.14602300 | 1.80447700  |
| H  | 2.22804800 | -2.54101400 | 0.80414600  |
| O  | 2.78704600 | -0.68222700 | 0.06118300  |
| Cu | 4.60775900 | -0.91992700 | 0.09264000  |
| N  | 5.12249900 | 1.06921200  | 0.04967100  |
| C  | 6.17520100 | 1.53386700  | -0.51945400 |
| O  | 6.14921800 | 2.83763000  | -0.86201100 |
| C  | 4.78262800 | 3.29285000  | -0.62024700 |
| C  | 4.17934200 | 2.19707700  | 0.28462600  |
| H  | 3.19473400 | 1.87880100  | -0.06675900 |
| C  | 4.04989300 | 2.59150000  | 1.79313100  |
| C  | 3.57206700 | 1.38205200  | 2.61881700  |
| H  | 2.64529700 | 0.96568400  | 2.21300000  |
| H  | 3.38407500 | 1.69416100  | 3.65353600  |
| H  | 4.32255300 | 0.58735300  | 2.64552700  |
| C  | 2.98395300 | 3.70487400  | 1.88913600  |
| H  | 2.01843300 | 3.36717100  | 1.49228200  |
| H  | 3.27199700 | 4.61639500  | 1.35016100  |
| H  | 2.83151900 | 3.98546300  | 2.93783600  |
| C  | 5.38392900 | 3.09611200  | 2.37844500  |
| H  | 6.15338300 | 2.31769200  | 2.34993400  |
| H  | 5.24259200 | 3.37114400  | 3.43020000  |
| H  | 5.76634200 | 3.98476400  | 1.86090400  |
| H  | 4.29173700 | 3.36322200  | -1.59620700 |
| H  | 4.84757800 | 4.28287900  | -0.17065900 |
| C  | 7.50188500 | 0.83903000  | -0.77127500 |
| C  | 7.35847600 | -0.65877900 | -0.96432100 |
| N  | 6.31228800 | -1.40036300 | -0.86877000 |
| C  | 6.69020300 | -2.79784600 | -1.23364400 |
| C  | 8.23137800 | -2.71152800 | -1.25961600 |
| O  | 8.50651200 | -1.27527000 | -1.28048100 |
| H  | 8.70621400 | -3.13785600 | -2.14318100 |
| H  | 8.68378900 | -3.11380600 | -0.35051800 |
| C  | 6.00667500 | -3.28979800 | -2.54617300 |
| C  | 6.39207900 | -2.42374700 | -3.76058100 |
| H  | 6.07922000 | -1.38189000 | -3.62612400 |
| H  | 5.89623000 | -2.80087400 | -4.66286500 |
| H  | 7.47156500 | -2.43403100 | -3.95571400 |
| C  | 4.47629400 | -3.26400300 | -2.36482200 |
| H  | 4.09366800 | -2.24493800 | -2.24295300 |
| H  | 4.16734700 | -3.84800700 | -1.48967100 |
| H  | 3.98382400 | -3.69469600 | -3.24508300 |

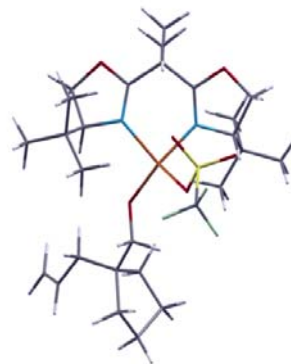

|   |             |             |             |
|---|-------------|-------------|-------------|
| C | 6.44500300  | -4.75079900 | -2.78594100 |
| H | 7.52438600  | -4.84248400 | -2.95750800 |
| H | 5.94037500  | -5.15409700 | -3.67176100 |
| H | 6.18384500  | -5.38953200 | -1.93324200 |
| H | 6.37167900  | -3.45027900 | -0.41819000 |
| C | 8.19007300  | 1.43226800  | -2.02856500 |
| H | 7.57141300  | 1.30338400  | -2.92321000 |
| H | 9.14793300  | 0.93465600  | -2.19262200 |
| H | 8.36545000  | 2.50014300  | -1.88447800 |
| C | 8.39560300  | 1.08098200  | 0.48577200  |
| H | 7.96382200  | 0.60634400  | 1.37128900  |
| H | 8.49509700  | 2.15667100  | 0.66020100  |
| H | 9.38989200  | 0.66233500  | 0.30815800  |
| O | 4.83386800  | -2.40223500 | 1.51573500  |
| S | 6.07797300  | -2.37427000 | 2.38615100  |
| C | 5.40195500  | -3.03988800 | 4.00778700  |
| F | 6.38747100  | -3.11618000 | 4.91626800  |
| F | 4.88072600  | -4.26540100 | 3.83914200  |
| F | 4.44284700  | -2.23074400 | 4.48800700  |
| O | 6.53564300  | -1.00525800 | 2.69207900  |
| O | 7.10301900  | -3.34724300 | 1.97033700  |
| C | 0.48268000  | -2.20316600 | -1.26347700 |
| C | -0.05681300 | -3.62043100 | -0.99666100 |
| C | -1.12919300 | -3.38638700 | 0.08056800  |
| C | -0.47475100 | -2.34824300 | 1.01372500  |
| H | -1.20996200 | -1.74486100 | 1.55903600  |
| H | 0.12236500  | -2.86806500 | 1.77593100  |
| H | -1.42663100 | -4.30151800 | 0.60679000  |
| H | -2.03204900 | -2.96791900 | -0.38537600 |
| H | 0.73731500  | -4.26616800 | -0.59557300 |
| H | -0.44726200 | -4.10671300 | -1.89908500 |
| H | 1.48345600  | -2.19494200 | -1.70842400 |
| H | -0.18696100 | -1.68785300 | -1.96353200 |
| H | 0.70414300  | 0.53679900  | -0.64597900 |
| H | 0.08212500  | 0.45312700  | 1.00159700  |
| C | -1.40300300 | 0.20703600  | -0.50358200 |
| C | -1.73433500 | 0.89406400  | -1.60292300 |
| H | -2.77022500 | 1.02191900  | -1.90878000 |
| H | -0.97840900 | 1.35644400  | -2.23636500 |
| H | -2.20564400 | -0.23211900 | 0.09172200  |

**[C<sub>26</sub>H<sub>45</sub>CuN<sub>2</sub>O<sub>3</sub>]<sup>+</sup> (tBu-Pdt-1) Major**

|   |            |             |            |
|---|------------|-------------|------------|
| C | 0.00000000 | 0.00000000  | 0.00000000 |
| C | 1.31579900 | 0.53961900  | 0.50373300 |
| C | 2.39277300 | -0.45132600 | 0.94661500 |
| C | 3.06164500 | 0.22049000  | 2.16688600 |
| C | 1.81914500 | 0.80290100  | 2.85572500 |
| H | 1.28820700 | 0.03634800  | 3.43609500 |
| H | 2.03399400 | 1.65781400  | 3.50545400 |
| O | 0.96566600 | 1.27494500  | 1.77936700 |
| C | 4.07496100 | 1.33976300  | 1.76681500 |
| C | 5.19429300 | 1.26697600  | 2.81900000 |

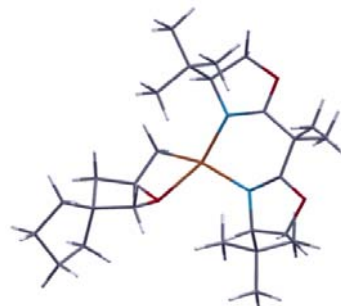

|    |             |             |             |
|----|-------------|-------------|-------------|
| C  | 5.33002700  | -0.24299500 | 3.06854200  |
| C  | 3.86894700  | -0.73716800 | 3.10172800  |
| H  | 3.76994500  | -1.78514900 | 2.79780500  |
| H  | 3.48070700  | -0.66947300 | 4.12754200  |
| H  | 5.87706700  | -0.48599300 | 3.98545800  |
| H  | 5.87043800  | -0.70840300 | 2.23356300  |
| H  | 4.88596200  | 1.77455000  | 3.74421500  |
| H  | 6.12358100  | 1.73961700  | 2.48376100  |
| H  | 3.60398300  | 2.32775100  | 1.70085100  |
| H  | 4.49434500  | 1.11879500  | 0.77612500  |
| H  | 3.09853600  | -0.66764300 | 0.13824300  |
| H  | 1.92702600  | -1.39876900 | 1.24733800  |
| H  | 1.72874800  | 1.31219300  | -0.15244100 |
| Cu | -1.10315400 | 0.93014400  | 1.40814300  |
| N  | -2.80168000 | -0.16143000 | 1.64371800  |
| C  | -3.96516200 | 0.36128000  | 1.84218600  |
| O  | -5.02392900 | -0.39192700 | 1.51244600  |
| C  | -4.50421800 | -1.58330900 | 0.84921600  |
| C  | -3.00662500 | -1.58101700 | 1.22044500  |
| H  | -2.39065300 | -1.76697600 | 0.33671700  |
| C  | -2.59964900 | -2.61535600 | 2.32218000  |
| C  | -1.11089700 | -2.44671900 | 2.68216500  |
| H  | -0.46666000 | -2.59044700 | 1.80747500  |
| H  | -0.82150100 | -3.19285500 | 3.43087500  |
| H  | -0.90396400 | -1.45667400 | 3.10350400  |
| C  | -2.80125600 | -4.03015900 | 1.73682500  |
| H  | -2.21502900 | -4.17249600 | 0.82030700  |
| H  | -3.85054600 | -4.24514900 | 1.50392500  |
| H  | -2.47247800 | -4.78523300 | 2.45936500  |
| C  | -3.44325600 | -2.45510300 | 3.60209400  |
| H  | -3.30235800 | -1.46853800 | 4.05814400  |
| H  | -3.13837900 | -3.20192300 | 4.34348300  |
| H  | -4.51491200 | -2.59987100 | 3.42355600  |
| H  | -4.68488600 | -1.46018500 | -0.22259300 |
| H  | -5.07363900 | -2.43337600 | 1.22150300  |
| C  | -4.35057500 | 1.69279300  | 2.45986900  |
| C  | -3.17252100 | 2.60574500  | 2.74292600  |
| N  | -1.97791200 | 2.57139500  | 2.26249800  |
| C  | -1.27878300 | 3.82458200  | 2.68037300  |
| C  | -2.22076500 | 4.35704500  | 3.78278200  |
| O  | -3.46656200 | 3.63080700  | 3.55544200  |
| H  | -2.45168300 | 5.41949800  | 3.72246400  |
| H  | -1.88691500 | 4.11136200  | 4.79507300  |
| C  | -1.01978300 | 4.81545900  | 1.49813100  |
| C  | -2.33294800 | 5.32124600  | 0.86912300  |
| H  | -2.92442800 | 4.49913500  | 0.45033100  |
| H  | -2.10825000 | 6.00952500  | 0.04683900  |
| H  | -2.96161600 | 5.86807400  | 1.58143400  |
| C  | -0.17338100 | 4.13029900  | 0.40831200  |
| H  | -0.71730900 | 3.30820600  | -0.07181000 |
| H  | 0.75964200  | 3.72860700  | 0.81690000  |
| H  | 0.08067500  | 4.85380400  | -0.37463100 |

C -0.21678200 6.00910500 2.05977000  
 H -0.76877300 6.56747900 2.82515500  
 H 0.01829700 6.71501400 1.25557700  
 H 0.73332900 5.68105200 2.49974500  
 H -0.30744800 3.54507700 3.09873500  
 C -5.30146500 2.45167900 1.48498500  
 H -4.81908600 2.63553700 0.51974000  
 H -5.58757200 3.41105800 1.92299900  
 H -6.20350500 1.85913700 1.31778600  
 C -5.10597100 1.38971600 3.78738500  
 H -4.45490800 0.88969600 4.51180000  
 H -5.96388200 0.74546100 3.58431500  
 H -5.46152400 2.32269500 4.22854200  
 H -0.09479500 -1.08563100 0.05736800  
 H -0.31475000 0.37387000 -0.97858400

## REFERENCES

1. Gaussian 09, Revision A.02, M. J. Frisch *et al.*, Gaussian, Inc., Wallingford CT, 2009.
2. A. D. Becke, *Phys. Rev. A*, **38** (1988) 3098; C. Lee, W. Yang, and R. G. Parr, *Phys. Rev. B*, **37** (1988) 785; T. J. Lee and P. R. Taylor, *Int. J. Quantum Chem., Quant. Chem. Symp.*, **S23** (1989) 199.
3. T. Clark, J. Chandrasekhar, G.W. Spitznagel, P.V.R. Schleyer, *J. Comp. Chem.* **4** (1983), 294; P.C. Hariharan and J.A. Pople, *Theoret. Chimica Acta*, **28** (1973), 213; M.M. Francl, W.J. Pietro, W.J. Hehre, J.S. Binkley, M.S. Gordon, D.J. DeFrees and J. A. Pople, *J. Chem. Phys.*, **77** (1982), 3654 .
4. J. Tomasi, B. Mennucci, and E. Cancès, *J. Mol. Struct. (Theochem)*, **464** (1999) 211.
5. L. Belding, S. Chemler, and T. Dudding, *J. Org. Chem.*, **78** (2013), 10288.
6. K. Fukui, *Acc. Chem. Res.*, **14** (1981), 363.
7. NBO Version 3.1., E. D. Glendening, A. E. Reed, J. E. Carpenter, and F. Weinhold.
8. M.D. Hanwell, D.E. Curtis, D.C. Lonie, T. Vandermeersch, E. Zurek **and** G. R Hutchison, *Journal of Cheminformatics*, **4** (2012), 17.
9. C.F. Macrae, I. J. Bruno, J.A. Chisholom, P.R. Edgington, P. McCabe, E. Pidcock, L. Rodriguez-Monge, R. Taylor, J. van de Streek, P. A. Wood, *J. Appl. Cryst.*, **41** (2008) 466.
10. S. F. Boys and F. Bernardi, *Mol. Phys.*, **19** (1970) 553; S. Simon, M. Duran, and J. J. Dannenberg, *J. Chem. Phys.*, **105** (1996) 11024.
11. LanL2DZ and Stuttgart RSC 1997 EPC where obtained using Basis Set Exchange (BSE) software from the EMSL Basis Set Library website. The Role of Databases in Support of Computational Chemistry Calculations, D. Feller, *J. Comp. Chem.*, **17** (1996), 1571; Basis Set Exchange: A Community Database for Computational Sciences, K.L. Schuchardt, B.T. Didier, T. Elsethagen, L. Sun, V. Gurumoorthi, J. Chase, J. Li, and T.L. Windus, *J. Chem. Inf. Model.*, **47**, (2007) 1045, doi:10.1021/ci600510j.

12. ADF2010.02, E. J. Baerends *et al.*, <http://www.scm.com>
13. *WebMO Enterprise*, version 13.1.003e, Schmidt, J.R.; Polik, W.F., WebMO LLC: Holland, MI, USA, 2013; <http://www.webmo.net>
14. J. P. Foster, F. Weinhold, *J. Am. Chem. Soc.*, **102** (1980), 7211; A. E. Reed, F. Weinhold, *J. Chem. Phys.*, **78** (1983), 4066; A. E. Reed, R. B. Weinstock, F. Weinhold, *J. Chem. Phys.*, **83** (1985), 735.
15. D. Josa, A. Peña-Gallego, J. Rodríguez-Otero, and E. M. Cabaleiro-Lago, The 15th International Electronic Conference on Synthetic Organic Chemistry, <http://www.usc.es/congresos/ecsoc/15/>
16. L. R. Domingo, M.T. Picher, V.S. Safont, J. Andrés, G. Chuchani, *J. Phys. Chem. A.*, **103** (1999), 3935.
